# Supplementary material
Source: publisher figshare collection journal article supplement (https://gsajournals.figshare.com/ndownloader/files/23547107)
Supplement: Supplementary file 1 [file 23547107]

## Sheet: Heading
Low oxygen stress during early development influences regulation of hypoxia-response genes in farmed Atlantic salmon (Salmo salar)
Tara Kelly*,co, Hanne Johnsen†,‡,co, Erik Burgerhout†,co, Helge Tveiten†,§, Tina Thesslund†, Øivind Andersen †,**, Nicholas Robinson†,*
File S1. Results of differential gene expression analysis comparing treatments 60%O2 925DD to 100%O2 925DD (60v100) 30%O2 990DD to 100%O2 925DD (30v100) and 30%O2 990DD to 60%O2 925DD (30v60).

## Sheet: 60v100
	gene_ID	baseMean	log2FoldChange	lfcSE	stat	pvalue	padj	contig_ID	start	end	gene_name	product
1	gene100:106602405	891.474	-0.479684	0.155602	-3.08276	0.00205091	0.0237809	ssa01	4303236	4306903	atp5s	ATP synthase%2C H+ transporting%2C mitochondrial Fo complex%2C subunit s (factor B)%2C transcript variant X2
2	gene100:106602405	891.474	-0.479684	0.155602	-3.08276	0.00205091	0.0237809	ssa01	4303236	4306903	atp5s	ATP synthase%2C H+ transporting%2C mitochondrial Fo complex%2C subunit s (factor B)%2C transcript variant X1
3	gene10009:100195495	330.461	0.971735	0.207436	4.68451	2.80633e-06	0.000520644	ssa04	48238243	48244509	mmp13	Collagenase 3
4	gene10015:106603552	409.771	-0.361425	0.107953	-3.348	0.000813982	0.0138198	ssa04	48448827	48516582	LOC106603552	nuclear receptor-interacting protein 1-like%2C transcript variant X1
5	gene10015:106603552	409.771	-0.361425	0.107953	-3.348	0.000813982	0.0138198	ssa04	48506405	48516582	LOC106603552	nuclear receptor-interacting protein 1-like%2C transcript variant X3
6	gene10015:106603552	409.771	-0.361425	0.107953	-3.348	0.000813982	0.0138198	ssa04	48448827	48516582	LOC106603552	nuclear receptor-interacting protein 1-like%2C transcript variant X2
7	gene10046:106603524	241.725	-0.757092	0.161344	-4.69242	2.69995e-06	0.000505916	ssa04	49690274	50005857	LOC106603524	autism susceptibility gene 2 protein-like%2C transcript variant X6
8	gene10046:106603524	241.725	-0.757092	0.161344	-4.69242	2.69995e-06	0.000505916	ssa04	49690274	50143174	LOC106603524	autism susceptibility gene 2 protein-like%2C transcript variant X1
9	gene10046:106603524	241.725	-0.757092	0.161344	-4.69242	2.69995e-06	0.000505916	ssa04	49690274	50143174	LOC106603524	autism susceptibility gene 2 protein-like%2C transcript variant X4
10	gene10046:106603524	241.725	-0.757092	0.161344	-4.69242	2.69995e-06	0.000505916	ssa04	49690274	50143174	LOC106603524	autism susceptibility gene 2 protein-like%2C transcript variant X3
11	gene10046:106603524	241.725	-0.757092	0.161344	-4.69242	2.69995e-06	0.000505916	ssa04	49690274	50143174	LOC106603524	autism susceptibility gene 2 protein-like%2C transcript variant X5
12	gene10046:106603524	241.725	-0.757092	0.161344	-4.69242	2.69995e-06	0.000505916	ssa04	49690274	49714259	LOC106603524	autism susceptibility gene 2 protein-like%2C transcript variant X8
13	gene10046:106603524	241.725	-0.757092	0.161344	-4.69242	2.69995e-06	0.000505916	ssa04	49690274	50143173	LOC106603524	autism susceptibility gene 2 protein-like%2C transcript variant X2
14	gene10046:106603524	241.725	-0.757092	0.161344	-4.69242	2.69995e-06	0.000505916	ssa04	49690274	49848965	LOC106603524	autism susceptibility gene 2 protein-like%2C transcript variant X7
15	gene10057:106603516	54.0312	0.395507	0.127129	3.11108	0.00186402	0.0223325	ssa04	50981356	51145087	LOC106603516	transmembrane protein 211-like
16	gene10062:106603511	170.212	0.326735	0.112806	2.89644	0.00377427	0.0344399	ssa04	51211547	51435729	LOC106603511	active breakpoint cluster region-related protein-like
17	gene10065:106603510	100.854	0.369121	0.112605	3.27801	0.00104542	0.015952	ssa04	51442404	51625930	LOC106603510	cytospin-B-like%2C transcript variant X2
18	gene10065:106603510	100.854	0.369121	0.112605	3.27801	0.00104542	0.015952	ssa04	51485017	51625930	LOC106603510	cytospin-B-like%2C transcript variant X1
19	gene10065:106603510	100.854	0.369121	0.112605	3.27801	0.00104542	0.015952	ssa04	51442400	51625930	LOC106603510	cytospin-B-like%2C transcript variant X3
20	gene10065:106603510	100.854	0.369121	0.112605	3.27801	0.00104542	0.015952	ssa04	51524720	51625930	LOC106603510	cytospin-B-like%2C transcript variant X5
21	gene10065:106603510	100.854	0.369121	0.112605	3.27801	0.00104542	0.015952	ssa04	51485017	51611137	LOC106603510	cytospin-B-like%2C transcript variant X4
22	gene10068:106603505	987.246	-0.397166	0.124044	-3.20182	0.00136562	0.018536	ssa04	51726155	51837135	LOC106603505	nuclear receptor corepressor 1-like%2C transcript variant X5
23	gene10068:106603505	987.246	-0.397166	0.124044	-3.20182	0.00136562	0.018536	ssa04	51726155	51837135	LOC106603505	nuclear receptor corepressor 1-like%2C transcript variant X7
24	gene10068:106603505	987.246	-0.397166	0.124044	-3.20182	0.00136562	0.018536	ssa04	51726155	51837135	LOC106603505	nuclear receptor corepressor 1-like%2C transcript variant X2
25	gene10068:106603505	987.246	-0.397166	0.124044	-3.20182	0.00136562	0.018536	ssa04	51726155	51783022	LOC106603505	nuclear receptor corepressor 1-like%2C transcript variant X6
26	gene10068:106603505	987.246	-0.397166	0.124044	-3.20182	0.00136562	0.018536	ssa04	51726155	51837135	LOC106603505	nuclear receptor corepressor 1-like%2C transcript variant X3
27	gene10068:106603505	987.246	-0.397166	0.124044	-3.20182	0.00136562	0.018536	ssa04	51726155	51837135	LOC106603505	nuclear receptor corepressor 1-like%2C transcript variant X4
28	gene10068:106603505	987.246	-0.397166	0.124044	-3.20182	0.00136562	0.018536	ssa04	51726155	51837333	LOC106603505	nuclear receptor corepressor 1-like%2C transcript variant X1
29	gene10072:106603501	216.113	-0.439744	0.112737	-3.90062	9.59475e-05	0.00381307	ssa04	51886751	51910208	LOC106603501	P2X purinoceptor 5-like%2C transcript variant X2
30	gene10072:106603501	216.113	-0.439744	0.112737	-3.90062	9.59475e-05	0.00381307	ssa04	51887660	51910208	LOC106603501	P2X purinoceptor 5-like%2C transcript variant X3
31	gene10072:106603501	216.113	-0.439744	0.112737	-3.90062	9.59475e-05	0.00381307	ssa04	51886751	51910208	LOC106603501	P2X purinoceptor 5-like%2C transcript variant X1
32	gene10073:106603502	222.764	-0.422392	0.114016	-3.70468	0.000211662	0.00611112	ssa04	51910207	51911426	LOC106603502	ER membrane protein complex subunit 6%2C transcript variant X2
33	gene10073:106603502	222.764	-0.422392	0.114016	-3.70468	0.000211662	0.00611112	ssa04	51910207	51911424	LOC106603502	ER membrane protein complex subunit 6%2C transcript variant X1
34	gene10077:106603497	50.4583	0.432218	0.138005	3.13189	0.00173683	0.0213898	ssa04	51961446	52020880	LOC106603497	protein FAM222B-like%2C transcript variant X2
35	gene10077:106603497	50.4583	0.432218	0.138005	3.13189	0.00173683	0.0213898	ssa04	51961446	52012626	LOC106603497	protein FAM222B-like%2C transcript variant X1
36	gene10093:106603486	2049.62	-0.409134	0.120265	-3.40194	0.000669101	0.0123578	ssa04	53334768	53340627	LOC106603486	ADP-ribosylation factor-like protein 9%2C transcript variant X2
37	gene10093:106603486	2049.62	-0.409134	0.120265	-3.40194	0.000669101	0.0123578	ssa04	53334431	53340627	LOC106603486	ADP-ribosylation factor-like protein 9%2C transcript variant X1
38	gene10095:106603485	216.536	0.233282	0.0863697	2.70097	0.00691373	0.0495978	ssa04	53352043	53394579	LOC106603485	G protein-coupled receptor kinase 6-like
39	gene10105:106603475	1759.88	-0.266695	0.0966796	-2.75854	0.00580595	0.0445856	ssa04	53874892	53876552	LOC106603475	cytochrome c oxidase subunit 7B2%2C mitochondrial-like
40	gene10106:100194765	637.439	0.205576	0.0749225	2.74386	0.00607222	0.0457412	ssa04	53893545	53915039	pgk	Phosphoglycerate kinase
41	gene10118:106603466	310.189	-0.211611	0.0671758	-3.1501	0.00163213	0.0206572	ssa04	54498054	54531466	trim37	tripartite motif containing 37%2C transcript variant X2
42	gene10118:106603466	310.189	-0.211611	0.0671758	-3.1501	0.00163213	0.0206572	ssa04	54498054	54531466	trim37	tripartite motif containing 37%2C transcript variant X1
43	gene10122:106603464	638.232	-0.359644	0.116857	-3.07763	0.00208653	0.0240377	ssa04	54694852	54700933	ska2	spindle and kinetochore associated complex subunit 2
44	gene10130:106603456	1064.54	0.202816	0.0706139	2.87219	0.00407643	0.0360303	ssa04	54843768	54884363	LOC106603456	3-methyl-2-oxobutanoate dehydrogenase [lipoamide] kinase%2C mitochondrial-like
45	gene10136:106603453	283.219	-0.279271	0.10352	-2.69775	0.00698104	0.0498456	ssa04	55109914	55125738	LOC106603453	derlin-2-like
46	gene10143:100195386	1161.38	-0.354979	0.0985711	-3.60125	0.000316696	0.00766698	ssa04	55296440	55303587	psmg1	proteasome (prosome%2C macropain) assembly chaperone 1
47	gene10145:100194969	406.349	-0.242098	0.0891025	-2.71708	0.00658607	0.0481643	ssa04	55417344	55447539	erg	v-ets erythroblastosis virus E26 oncogene like (avian)%2C transcript variant X6
48	gene10145:100194969	406.349	-0.242098	0.0891025	-2.71708	0.00658607	0.0481643	ssa04	55417344	55447539	erg	v-ets erythroblastosis virus E26 oncogene like (avian)%2C transcript variant X8
49	gene10145:100194969	406.349	-0.242098	0.0891025	-2.71708	0.00658607	0.0481643	ssa04	55425120	55447539	erg	v-ets erythroblastosis virus E26 oncogene like (avian)%2C transcript variant X7
50	gene10145:100194969	406.349	-0.242098	0.0891025	-2.71708	0.00658607	0.0481643	ssa04	55404469	55447539	erg	v-ets erythroblastosis virus E26 oncogene like (avian)%2C transcript variant X10
51	gene10145:100194969	406.349	-0.242098	0.0891025	-2.71708	0.00658607	0.0481643	ssa04	55425121	55447539	erg	v-ets erythroblastosis virus E26 oncogene like (avian)%2C transcript variant X4
52	gene10145:100194969	406.349	-0.242098	0.0891025	-2.71708	0.00658607	0.0481643	ssa04	55417344	55447539	erg	v-ets erythroblastosis virus E26 oncogene like (avian)%2C transcript variant X5
53	gene10145:100194969	406.349	-0.242098	0.0891025	-2.71708	0.00658607	0.0481643	ssa04	55370244	55447539	erg	v-ets erythroblastosis virus E26 oncogene like (avian)%2C transcript variant X2
54	gene10145:100194969	406.349	-0.242098	0.0891025	-2.71708	0.00658607	0.0481643	ssa04	55417344	55447539	erg	v-ets erythroblastosis virus E26 oncogene like (avian)%2C transcript variant X3
55	gene10145:100194969	406.349	-0.242098	0.0891025	-2.71708	0.00658607	0.0481643	ssa04	55425180	55447539	erg	v-ets erythroblastosis virus E26 oncogene like (avian)
56	gene10145:100194969	406.349	-0.242098	0.0891025	-2.71708	0.00658607	0.0481643	ssa04	55425121	55447539	erg	v-ets erythroblastosis virus E26 oncogene like (avian)%2C transcript variant X9
57	gene10145:100194969	406.349	-0.242098	0.0891025	-2.71708	0.00658607	0.0481643	ssa04	55417344	55447539	erg	v-ets erythroblastosis virus E26 oncogene like (avian)%2C transcript variant X1
58	gene10150:100196862	336.633	-0.261624	0.0788375	-3.31852	0.000904953	0.0146244	ssa04	55722327	55724283	pigp	phosphatidylinositol glycan anchor biosynthesis%2C class P
59	gene10150:100196862	336.633	-0.261624	0.0788375	-3.31852	0.000904953	0.0146244	ssa04	55721397	55724287	pigp	phosphatidylinositol glycan anchor biosynthesis%2C class P%2C transcript variant X3
60	gene10150:100196862	336.633	-0.261624	0.0788375	-3.31852	0.000904953	0.0146244	ssa04	55719920	55724287	pigp	phosphatidylinositol glycan anchor biosynthesis%2C class P%2C transcript variant X1
61	gene10150:100196862	336.633	-0.261624	0.0788375	-3.31852	0.000904953	0.0146244	ssa04	55722340	55724287	pigp	phosphatidylinositol glycan anchor biosynthesis%2C class P%2C transcript variant X2
62	gene10188:106603639	175.375	0.359231	0.114315	3.14247	0.00167528	0.0209976	ssa04	56572579	56726438	LOC106603639	zinc finger and BTB domain-containing protein 16-A%2C transcript variant X1
63	gene10188:106603639	175.375	0.359231	0.114315	3.14247	0.00167528	0.0209976	ssa04	56572579	56726438	LOC106603639	zinc finger and BTB domain-containing protein 16-A%2C transcript variant X2
64	gene10192:106603647	43.9118	-0.517162	0.152514	-3.39091	0.000696613	0.0125776	ssa04	58287674	58289615	LOC106603647	anaphase-promoting complex subunit 13-like%2C transcript variant X1
65	gene10201:106603672	210.63	-0.523259	0.0879825	-5.9473	2.72597e-09	2.83774e-06	ssa04	59015259	59021751	vps26b	VPS26 retromer complex component B
66	gene10204:106603669	19.6655	0.501733	0.183018	2.74144	0.00611702	0.0459586	ssa04	59140170	59150507	LOC106603669	myb/SANT-like DNA-binding domain-containing protein 2%2C transcript variant X1
67	gene10204:106603669	19.6655	0.501733	0.183018	2.74144	0.00611702	0.0459586	ssa04	59140170	59150507	LOC106603669	myb/SANT-like DNA-binding domain-containing protein 2%2C transcript variant X2
68	gene10210:106603662	400.721	-0.407917	0.117389	-3.47492	0.000511006	0.0104249	ssa04	60192658	60360486	LOC106603662	opioid-binding protein/cell adhesion molecule-like%2C transcript variant X5
69	gene10210:106603662	400.721	-0.407917	0.117389	-3.47492	0.000511006	0.0104249	ssa04	60192658	60360486	LOC106603662	opioid-binding protein/cell adhesion molecule-like%2C transcript variant X6
70	gene10210:106603662	400.721	-0.407917	0.117389	-3.47492	0.000511006	0.0104249	ssa04	60192658	60360485	LOC106603662	opioid-binding protein/cell adhesion molecule-like%2C transcript variant X1
71	gene10210:106603662	400.721	-0.407917	0.117389	-3.47492	0.000511006	0.0104249	ssa04	60192658	60657476	LOC106603662	opioid-binding protein/cell adhesion molecule-like%2C transcript variant X3
72	gene10210:106603662	400.721	-0.407917	0.117389	-3.47492	0.000511006	0.0104249	ssa04	60192658	60360484	LOC106603662	opioid-binding protein/cell adhesion molecule-like%2C transcript variant X4
73	gene10210:106603662	400.721	-0.407917	0.117389	-3.47492	0.000511006	0.0104249	ssa04	60192658	60360486	LOC106603662	opioid-binding protein/cell adhesion molecule-like%2C transcript variant X2
74	gene10214:106603660	177.224	0.374059	0.107886	3.46716	0.000525991	0.0106076	ssa04	60821219	60824174	LOC106603660	78 kDa glucose-regulated protein homolog
75	gene10228:100380315	112.771	0.25095	0.0838892	2.99144	0.00277662	0.0286106	ssa04	61277597	61280638	i2bp1	Interferon regulatory factor 2-binding protein 1
76	gene10228:100380315	112.771	0.25095	0.0838892	2.99144	0.00277662	0.0286106	ssa04	61277597	61280666	i2bp1	Interferon regulatory factor 2-binding protein 1%2C transcript variant X1
77	gene10230:106603686	106.984	0.429771	0.123273	3.48634	0.000489686	0.0101277	ssa04	61335754	61344025	hic2	hypermethylated in cancer 2
78	gene10235:100196019	268.91	0.255104	0.0868846	2.93612	0.00332342	0.0317969	ssa04	61561365	61562707	hnrpl	heterogeneous nuclear ribonucleoprotein L
79	gene10247:106603699	127.191	-0.284315	0.105021	-2.70722	0.00678493	0.049021	ssa04	61894427	61900628	LOC106603699	delta-like protein B
80	gene10250:106603701	378.597	-0.317249	0.111206	-2.85279	0.00433372	0.0372672	ssa04	61932615	61942125	LOC106603701	myb-related transcription factor%2C partner of profilin-like%2C transcript variant X3
81	gene10250:106603701	378.597	-0.317249	0.111206	-2.85279	0.00433372	0.0372672	ssa04	61932615	61942126	LOC106603701	myb-related transcription factor%2C partner of profilin-like%2C transcript variant X2
82	gene10250:106603701	378.597	-0.317249	0.111206	-2.85279	0.00433372	0.0372672	ssa04	61932615	61942116	LOC106603701	myb-related transcription factor%2C partner of profilin-like%2C transcript variant X1
83	gene10255:106603705	5382.74	-0.250512	0.0797371	-3.14172	0.00167957	0.0210092	ssa04	62028054	62032540	LOC106603705	histone H3.3
84	gene10257:106603706	1448.01	-0.15236	0.0548721	-2.77663	0.00549258	0.043074	ssa04	62046469	62091384	fam168a	family with sequence similarity 168%2C member A%2C transcript variant X2
85	gene10257:106603706	1448.01	-0.15236	0.0548721	-2.77663	0.00549258	0.043074	ssa04	62046469	62091384	fam168a	family with sequence similarity 168%2C member A%2C transcript variant X1
86	gene10257:106603706	1448.01	-0.15236	0.0548721	-2.77663	0.00549258	0.043074	ssa04	62046469	62091384	fam168a	family with sequence similarity 168%2C member A%2C transcript variant X3
87	gene10258:100196115	122.39	-0.39874	0.101012	-3.94745	7.8989e-05	0.00339861	ssa04	62093511	62145452	LOC100196115	F-BAR and double SH3 domains protein 2%2C transcript variant X1
88	gene10258:100196115	122.39	-0.39874	0.101012	-3.94745	7.8989e-05	0.00339861	ssa04	62093511	62145452	LOC100196115	F-BAR and double SH3 domains protein 2%2C transcript variant X2
89	gene10266:106603714	22.5583	0.905857	0.20805	4.35403	1.3366e-05	0.00127133	ssa04	62338408	62419596	LOC106603714	calpain-5-like%2C transcript variant X2
90	gene10266:106603714	22.5583	0.905857	0.20805	4.35403	1.3366e-05	0.00127133	ssa04	62338408	62419685	LOC106603714	calpain-5-like%2C transcript variant X1
91	gene1027:106604361	46.7255	0.461887	0.158311	2.91758	0.00352755	0.0331585	ssa01	47481131	47515642	pprc1	peroxisome proliferator-activated receptor gamma%2C coactivator-related 1
92	gene10270:106603718	1548.57	-0.615369	0.166217	-3.70219	0.000213743	0.00614578	ssa04	62472325	62498172	LOC106603718	ELMO domain-containing protein 1-like%2C transcript variant X2
93	gene10270:106603718	1548.57	-0.615369	0.166217	-3.70219	0.000213743	0.00614578	ssa04	62472312	62498172	LOC106603718	ELMO domain-containing protein 1-like%2C transcript variant X1
94	gene10280:106603727	172.834	0.820684	0.15173	5.40884	6.34341e-08	3.6019e-05	ssa04	63085404	63095347	LOC106603727	ubiquitin carboxyl-terminal hydrolase 2-like
95	gene10281:106603728	30.5946	0.704944	0.185185	3.80671	0.00014083	0.00474035	ssa04	63126098	63161276	LOC106603728	alpha-tectorin-like%2C transcript variant X2
96	gene10281:106603728	30.5946	0.704944	0.185185	3.80671	0.00014083	0.00474035	ssa04	63136140	63161281	LOC106603728	alpha-tectorin-like%2C transcript variant X5
97	gene10281:106603728	30.5946	0.704944	0.185185	3.80671	0.00014083	0.00474035	ssa04	63128149	63161275	LOC106603728	alpha-tectorin-like%2C transcript variant X1
98	gene10281:106603728	30.5946	0.704944	0.185185	3.80671	0.00014083	0.00474035	ssa04	63128149	63167498	LOC106603728	alpha-tectorin-like%2C transcript variant X4
99	gene10281:106603728	30.5946	0.704944	0.185185	3.80671	0.00014083	0.00474035	ssa04	63128149	63167729	LOC106603728	alpha-tectorin-like%2C transcript variant X3
100	gene10308:106603746	139.533	-0.471354	0.150529	-3.13132	0.00174023	0.0214037	ssa04	63884440	64069907	LOC106603746	double C2-like domain-containing protein beta%2C transcript variant X2
101	gene10308:106603746	139.533	-0.471354	0.150529	-3.13132	0.00174023	0.0214037	ssa04	63884440	64069907	LOC106603746	double C2-like domain-containing protein beta%2C transcript variant X1
102	gene10314:106603753	15.8158	1.09683	0.304643	3.60039	0.00031774	0.00767243	ssa04	64524195	64557352	LOC106603753	protein NLRC3-like
103	gene10319:106603782	159.745	-0.37132	0.133495	-2.78153	0.0054103	0.0427305	ssa04	64619970	64628865	rad51d	RAD51 paralog D
104	gene10328:106603773	237.827	-0.306759	0.110007	-2.78855	0.00529453	0.0421986	ssa04	65917676	65927604	LOC106603773	leucine-rich repeat-containing protein 32-like%2C transcript variant X3
105	gene10328:106603773	237.827	-0.306759	0.110007	-2.78855	0.00529453	0.0421986	ssa04	65918538	65927604	LOC106603773	leucine-rich repeat-containing protein 32-like%2C transcript variant X4
106	gene10328:106603773	237.827	-0.306759	0.110007	-2.78855	0.00529453	0.0421986	ssa04	65918311	65927604	LOC106603773	leucine-rich repeat-containing protein 32-like%2C transcript variant X7
107	gene10328:106603773	237.827	-0.306759	0.110007	-2.78855	0.00529453	0.0421986	ssa04	65918311	65927604	LOC106603773	leucine-rich repeat-containing protein 32-like%2C transcript variant X6
108	gene10328:106603773	237.827	-0.306759	0.110007	-2.78855	0.00529453	0.0421986	ssa04	65918538	65927604	LOC106603773	leucine-rich repeat-containing protein 32-like%2C transcript variant X1
109	gene10328:106603773	237.827	-0.306759	0.110007	-2.78855	0.00529453	0.0421986	ssa04	65918538	65927604	LOC106603773	leucine-rich repeat-containing protein 32-like%2C transcript variant X5
110	gene10328:106603773	237.827	-0.306759	0.110007	-2.78855	0.00529453	0.0421986	ssa04	65918538	65927604	LOC106603773	leucine-rich repeat-containing protein 32-like%2C transcript variant X2
111	gene10339:106603764	108.123	-0.346158	0.126195	-2.74304	0.00608734	0.0458233	ssa04	66834719	66856169	rexo2	RNA exonuclease 2
112	gene10358:106603809	602.957	-0.362051	0.121602	-2.97734	0.00290766	0.0294413	ssa04	68106091	68133303	LOC106603809	protein transport protein Sec24A-like%2C transcript variant X2
113	gene10358:106603809	602.957	-0.362051	0.121602	-2.97734	0.00290766	0.0294413	ssa04	68106091	68133304	LOC106603809	protein transport protein Sec24A-like%2C transcript variant X1
114	gene10361:106603813	645.867	-0.361479	0.100527	-3.59584	0.000323345	0.00773799	ssa04	68420281	68421181	LOC106603813	CDKN2AIP N-terminal-like protein
115	gene10364:106603816	437.454	0.274679	0.0677255	4.05577	4.99685e-05	0.00258	ssa04	68447788	68455929	LOC106603816	serine/threonine-protein phosphatase 2A catalytic subunit alpha isoform-like
116	gene10368:106603818	2437.38	-0.347022	0.0885802	-3.9176	8.94351e-05	0.00365504	ssa04	68631639	68648048	LOC106603818	trans-Golgi network integral membrane protein 1-like
117	gene10380:106603832	30.6176	0.653085	0.209697	3.11443	0.00184303	0.0221946	ssa04	69705541	69714778	LOC106603832	solute carrier family 22 member 5-like%2C transcript variant X2
118	gene10380:106603832	30.6176	0.653085	0.209697	3.11443	0.00184303	0.0221946	ssa04	69705541	69714776	LOC106603832	solute carrier family 22 member 5-like%2C transcript variant X1
119	gene10393:106603845	798.263	-0.438985	0.100066	-4.38695	1.1495e-05	0.00115492	ssa04	70213709	70273812	LOC106603845	SH3 and PX domain-containing protein 2B-like%2C transcript variant X2
120	gene10393:106603845	798.263	-0.438985	0.100066	-4.38695	1.1495e-05	0.00115492	ssa04	70213709	70273812	LOC106603845	SH3 and PX domain-containing protein 2B-like%2C transcript variant X1
121	gene10393:106603845	798.263	-0.438985	0.100066	-4.38695	1.1495e-05	0.00115492	ssa04	70213709	70273812	LOC106603845	SH3 and PX domain-containing protein 2B-like%2C transcript variant X3
122	gene10395:106603846	10.0883	0.844439	0.281824	2.99634	0.00273244	0.0283447	ssa04	70548592	70656179	LOC106603846	gamma-aminobutyric acid receptor subunit beta-2-like
123	gene10396:106603847	12.2796	0.939289	0.320604	2.92974	0.00339241	0.0322683	ssa04	70671566	70686768	LOC106603847	gamma-aminobutyric acid receptor subunit alpha-6-like
124	gene10410:100380779	514.645	-0.194251	0.0672899	-2.88678	0.003892	0.035096	ssa04	71778517	71901213	LOC100380779	glucocorticoid receptor%2C transcript variant X2
125	gene10410:100380779	514.645	-0.194251	0.0672899	-2.88678	0.003892	0.035096	ssa04	71778517	71901212	LOC100380779	glucocorticoid receptor%2C transcript variant X1
126	gene10424:106603870	712.529	-0.308276	0.103649	-2.97423	0.00293727	0.0295985	ssa04	72880572	72915342	LOC106603870	cytoplasmic polyadenylation element-binding protein 4-like%2C transcript variant X1
127	gene10424:106603870	712.529	-0.308276	0.103649	-2.97423	0.00293727	0.0295985	ssa04	72880572	72915340	LOC106603870	cytoplasmic polyadenylation element-binding protein 4-like%2C transcript variant X2
128	gene10425:106603873	407.163	-0.30369	0.094105	-3.22714	0.00125036	0.0176659	ssa04	72970455	72972216	LOC106603873	biorientation of chromosomes in cell division protein 1-like
129	gene1043:106604510	154.896	-0.357327	0.0855937	-4.17468	2.98402e-05	0.00199695	ssa01	48416168	48424638	LOC106604510	NAD-dependent protein deacetylase sirtuin-1-like%2C transcript variant X1
130	gene1043:106604510	154.896	-0.357327	0.0855937	-4.17468	2.98402e-05	0.00199695	ssa01	48416170	48424638	LOC106604510	NAD-dependent protein deacetylase sirtuin-1-like%2C transcript variant X2
131	gene10457:106603906	310.041	0.364949	0.122155	2.98759	0.00281185	0.0288309	ssa04	74251992	74255377	LOC106603906	early growth response protein 1-like
132	gene10475:106603922	139.949	-0.517066	0.126931	-4.07359	4.62946e-05	0.00247848	ssa04	74658575	74777998	tenm2	teneurin transmembrane protein 2%2C transcript variant X7
133	gene10475:106603922	139.949	-0.517066	0.126931	-4.07359	4.62946e-05	0.00247848	ssa04	74658575	74777998	tenm2	teneurin transmembrane protein 2%2C transcript variant X6
134	gene10475:106603922	139.949	-0.517066	0.126931	-4.07359	4.62946e-05	0.00247848	ssa04	74658575	75017771	tenm2	teneurin transmembrane protein 2%2C transcript variant X1
135	gene10475:106603922	139.949	-0.517066	0.126931	-4.07359	4.62946e-05	0.00247848	ssa04	74658575	75017771	tenm2	teneurin transmembrane protein 2%2C transcript variant X3
136	gene10475:106603922	139.949	-0.517066	0.126931	-4.07359	4.62946e-05	0.00247848	ssa04	74658575	74777998	tenm2	teneurin transmembrane protein 2%2C transcript variant X5
137	gene10475:106603922	139.949	-0.517066	0.126931	-4.07359	4.62946e-05	0.00247848	ssa04	74658575	75017771	tenm2	teneurin transmembrane protein 2%2C transcript variant X4
138	gene10475:106603922	139.949	-0.517066	0.126931	-4.07359	4.62946e-05	0.00247848	ssa04	74658575	75017771	tenm2	teneurin transmembrane protein 2%2C transcript variant X2
139	gene10476:106603941	355.779	-1.05025	0.30395	-3.45534	0.000549597	0.0108805	ssa04	75136892	75138176	LOC106603941	insulin-like
140	gene10484:106603930	399.526	-0.270846	0.0680178	-3.98198	6.83427e-05	0.00311204	ssa04	75493893	75532891	LOC106603930	rabankyrin-5-like%2C transcript variant X2
141	gene10484:106603930	399.526	-0.270846	0.0680178	-3.98198	6.83427e-05	0.00311204	ssa04	75494008	75532891	LOC106603930	rabankyrin-5-like%2C transcript variant X1
142	gene10487:106603933	106.644	0.497447	0.157255	3.16331	0.00155989	0.0201164	ssa04	75625557	75726685	atp2a3	ATPase%2C Ca++ transporting%2C ubiquitous
143	gene105:100286498	1013.75	-0.194463	0.0596646	-3.25927	0.00111699	0.0165521	ssa01	4473242	4489437	cnih1	cornichon family AMPA receptor auxiliary protein 1%2C transcript variant X1
144	gene105:100286498	1013.75	-0.194463	0.0596646	-3.25927	0.00111699	0.0165521	ssa01	4473244	4489316	cnih1	cornichon family AMPA receptor auxiliary protein 1
145	gene10502:106603950	64.5226	0.451481	0.162067	2.78576	0.00534023	0.0424095	ssa04	76349565	76368656	LOC106603950	14-3-3 protein gamma-1-like
146	gene10511:100196849	843.184	-0.27248	0.0822719	-3.31195	0.00092649	0.0148065	ssa04	77101386	77103221	supt4h1	suppressor of Ty 4 homolog 1 (S. cerevisiae)
147	gene10518:100195592	642.26	-0.204151	0.0702263	-2.90705	0.00364854	0.0336946	ssa04	77269962	77271802	znhit3	zinc finger%2C HIT-type containing 3
148	gene1052:106604566	200.195	-0.474471	0.140849	-3.36866	0.000755355	0.013197	ssa01	48647172	48675003	LOC106604566	proto-oncogene tyrosine-protein kinase receptor Ret-like%2C transcript variant X1
149	gene1052:106604566	200.195	-0.474471	0.140849	-3.36866	0.000755355	0.013197	ssa01	48647172	48675410	LOC106604566	proto-oncogene tyrosine-protein kinase receptor Ret-like%2C transcript variant X2
150	gene10521:106603972	216.656	0.36125	0.0881857	4.09647	4.19505e-05	0.0023535	ssa04	77302169	77317456	ggnbp2	gametogenetin binding protein 2%2C transcript variant X3
151	gene10521:106603972	216.656	0.36125	0.0881857	4.09647	4.19505e-05	0.0023535	ssa04	77302171	77317456	ggnbp2	gametogenetin binding protein 2%2C transcript variant X4
152	gene10521:106603972	216.656	0.36125	0.0881857	4.09647	4.19505e-05	0.0023535	ssa04	77302169	77317456	ggnbp2	gametogenetin binding protein 2%2C transcript variant X2
153	gene10521:106603972	216.656	0.36125	0.0881857	4.09647	4.19505e-05	0.0023535	ssa04	77302166	77317456	ggnbp2	gametogenetin binding protein 2%2C transcript variant X1
154	gene10530:100196830	681.591	-0.722774	0.149734	-4.82705	1.3857e-06	0.000316649	ssa04	77724489	77739228	pcbd2	pterin-4 alpha-carbinolamine dehydratase/dimerization cofactor of hepatocyte nuclear factor 1 alpha (TCF1) 2
155	gene10530:100196830	681.591	-0.722774	0.149734	-4.82705	1.3857e-06	0.000316649	ssa04	77724487	77739316	pcbd2	pterin-4 alpha-carbinolamine dehydratase/dimerization cofactor of hepatocyte nuclear factor 1 alpha (TCF1) 2%2C transcript variant X1
156	gene10549:106603990	57.5171	0.662277	0.16687	3.96882	7.22286e-05	0.00321096	ssa04	78234975	78267326	LOC106603990	serine/threonine-protein kinase TAO1-like
157	gene10553:106603993	236.294	0.3608	0.116843	3.0879	0.00201576	0.0234458	ssa04	78499149	78541363	LOC106603993	globoside alpha-1%2C3-N-acetylgalactosaminyltransferase 1-like%2C transcript variant X1
158	gene10553:106603993	236.294	0.3608	0.116843	3.0879	0.00201576	0.0234458	ssa04	78500100	78535707	LOC106603993	globoside alpha-1%2C3-N-acetylgalactosaminyltransferase 1-like%2C transcript variant X2
159	gene10556:106603996	46.2939	0.417924	0.152153	2.74673	0.00601928	0.0455438	ssa04	78667077	78681819	smyd4	SET and MYND domain containing 4%2C transcript variant X1
160	gene10556:106603996	46.2939	0.417924	0.152153	2.74673	0.00601928	0.0455438	ssa04	78667077	78681819	smyd4	SET and MYND domain containing 4%2C transcript variant X2
161	gene10573:106604009	63.2127	0.642519	0.131624	4.88146	1.05304e-06	0.00027055	ssa04	79411216	79449699	LOC106604009	ubiquitin-like protein 3
162	gene10577:106604011	83.0937	0.49835	0.179257	2.78008	0.00543454	0.0428351	ssa04	79524484	79547563	LOC106604011	SUMO-specific isopeptidase USPL1-like
163	gene10590:106604027	109.672	-0.568339	0.188293	-3.01837	0.00254136	0.0271959	ssa04	80123753	80171374	LOC106604027	neurobeachin-like
164	gene10593:106604030	13.0283	0.916514	0.314452	2.91464	0.00356102	0.0332779	ssa04	80254417	80392275	LOC106604030	serine/threonine-protein kinase DCLK1-like%2C transcript variant X1
165	gene10599:106604036	160.32	0.546455	0.184008	2.96973	0.00298059	0.0298266	ssa04	80504350	80523318	LOC106604036	B-cell receptor CD22-like%2C transcript variant X6
166	gene10599:106604036	160.32	0.546455	0.184008	2.96973	0.00298059	0.0298266	ssa04	80504351	80523318	LOC106604036	B-cell receptor CD22-like%2C transcript variant X5
167	gene10599:106604036	160.32	0.546455	0.184008	2.96973	0.00298059	0.0298266	ssa04	80504037	80523320	LOC106604036	B-cell receptor CD22-like%2C transcript variant X4
168	gene10599:106604036	160.32	0.546455	0.184008	2.96973	0.00298059	0.0298266	ssa04	80504037	80524462	LOC106604036	B-cell receptor CD22-like%2C transcript variant X3
169	gene10599:106604036	160.32	0.546455	0.184008	2.96973	0.00298059	0.0298266	ssa04	80504037	80524461	LOC106604036	B-cell receptor CD22-like%2C transcript variant X2
170	gene10599:106604036	160.32	0.546455	0.184008	2.96973	0.00298059	0.0298266	ssa04	80504037	80523320	LOC106604036	B-cell receptor CD22-like%2C transcript variant X1
171	gene10607:106604041	14.7933	0.681	0.244439	2.78597	0.00533683	0.0424095	ssa04	80815010	80820340	LOC106604041	transcription regulator protein BACH2-like
172	gene10631:106604063	39.2352	0.53942	0.144918	3.72224	0.000197465	0.00582235	ssa04	82167352	82175304	LOC106604063	transcriptional coactivator YAP1-like
173	gene10635:106604067	124.292	0.357977	0.125988	2.84137	0.00449206	0.0381301	ssa04	82301906	82320259	dlat	dihydrolipoamide S-acetyltransferase
174	gene1064:106604714	178.276	-0.221588	0.0820862	-2.69945	0.00694533	0.0497103	ssa01	49362305	49367037	LOC106604714	protein FAM45A%2C transcript variant X1
175	gene1064:106604714	178.276	-0.221588	0.0820862	-2.69945	0.00694533	0.0497103	ssa01	49362304	49369267	LOC106604714	protein FAM45A%2C transcript variant X2
176	gene10643:106604074	265.283	0.32608	0.102711	3.17474	0.00149971	0.0196721	ssa05	162100	171512	LOC106604074	E3 ubiquitin-protein ligase RING2-like%2C transcript variant X3
177	gene10643:106604074	265.283	0.32608	0.102711	3.17474	0.00149971	0.0196721	ssa05	162100	171513	LOC106604074	E3 ubiquitin-protein ligase RING2-like%2C transcript variant X4
178	gene10643:106604074	265.283	0.32608	0.102711	3.17474	0.00149971	0.0196721	ssa05	162100	171511	LOC106604074	E3 ubiquitin-protein ligase RING2-like%2C transcript variant X1
179	gene10643:106604074	265.283	0.32608	0.102711	3.17474	0.00149971	0.0196721	ssa05	162100	171512	LOC106604074	E3 ubiquitin-protein ligase RING2-like%2C transcript variant X2
180	gene10657:106604087	1566.14	0.397679	0.11099	3.58302	0.000339641	0.00802041	ssa05	611712	665090	LOC106604087	plastin-3-like
181	gene1066:106604727	2212.4	-0.544578	0.123805	-4.39869	1.08906e-05	0.00112125	ssa01	49389327	49393354	prdx3	peroxiredoxin 3
182	gene10660:106604089	182.143	0.338678	0.121953	2.77713	0.00548419	0.0430371	ssa05	720552	741945	LOC106604089	magnesium transporter protein 1-like
183	gene10662:106604090	13.7118	1.09459	0.398199	2.74885	0.00598046	0.0453692	ssa05	765052	775345	LOC106604090	uncharacterized LOC106604090
184	gene10670:106604099	256.476	0.553351	0.174954	3.16284	0.00156238	0.0201278	ssa05	965223	1009603	LOC106604099	transcriptional regulator ATRX-like
185	gene10674:106604103	42.1473	0.543132	0.15447	3.5161	0.000437935	0.00937832	ssa05	1156697	1164298	LOC106604103	vacuolar ATPase assembly integral membrane protein vma21-like
186	gene10681:106604111	30.4648	0.521598	0.193376	2.69732	0.00698999	0.049868	ssa05	1428562	1469296	rnf44	ring finger protein 44%2C transcript variant X2
187	gene10681:106604111	30.4648	0.521598	0.193376	2.69732	0.00698999	0.049868	ssa05	1428562	1469296	rnf44	ring finger protein 44%2C transcript variant X3
188	gene10681:106604111	30.4648	0.521598	0.193376	2.69732	0.00698999	0.049868	ssa05	1435577	1469296	rnf44	ring finger protein 44%2C transcript variant X1
189	gene10681:106604111	30.4648	0.521598	0.193376	2.69732	0.00698999	0.049868	ssa05	1435578	1469295	rnf44	ring finger protein 44%2C transcript variant X4
190	gene10711:106604152	1295.36	-0.265192	0.0793445	-3.34229	0.000830896	0.0139949	ssa05	3998801	4034985	LOC106604152	annexin A6-like%2C transcript variant X1
191	gene10711:106604152	1295.36	-0.265192	0.0793445	-3.34229	0.000830896	0.0139949	ssa05	4006116	4034985	LOC106604152	annexin A6-like%2C transcript variant X5
192	gene10711:106604152	1295.36	-0.265192	0.0793445	-3.34229	0.000830896	0.0139949	ssa05	3998803	4034985	LOC106604152	annexin A6-like%2C transcript variant X2
193	gene10711:106604152	1295.36	-0.265192	0.0793445	-3.34229	0.000830896	0.0139949	ssa05	4005906	4034985	LOC106604152	annexin A6-like%2C transcript variant X4
194	gene10716:106604135	21.7659	0.642581	0.190101	3.38021	0.000724307	0.0128602	ssa05	4122590	4155860	LOC106604135	mothers against decapentaplegic homolog 5-like
195	gene10718:106604146	2212.75	-0.535252	0.127517	-4.19751	2.6987e-05	0.00190132	ssa05	4177441	4209523	LOC106604146	transforming growth factor-beta-induced protein ig-h3-like
196	gene10725:106604134	69.932	-0.470562	0.154692	-3.04193	0.00235064	0.0259623	ssa05	4441628	4465944	LOC106604134	shootin-1-like
197	gene10734:106604160	365.75	0.357616	0.0687847	5.19906	2.003e-07	9.09858e-05	ssa05	4845916	4864012	LOC106604160	dynactin subunit 4%2C transcript variant X4
198	gene10734:106604160	365.75	0.357616	0.0687847	5.19906	2.003e-07	9.09858e-05	ssa05	4845916	4864012	LOC106604160	dynactin subunit 4%2C transcript variant X1
199	gene10734:106604160	365.75	0.357616	0.0687847	5.19906	2.003e-07	9.09858e-05	ssa05	4845916	4864011	LOC106604160	dynactin subunit 4%2C transcript variant X5
200	gene10734:106604160	365.75	0.357616	0.0687847	5.19906	2.003e-07	9.09858e-05	ssa05	4845916	4864012	LOC106604160	dynactin subunit 4%2C transcript variant X3
201	gene10735:106604162	143.37	-0.273392	0.0943488	-2.89767	0.00375947	0.0343569	ssa05	4878093	4884655	LOC106604162	DNA-directed RNA polymerase II subunit RPB7-like%2C transcript variant X2
202	gene10735:106604162	143.37	-0.273392	0.0943488	-2.89767	0.00375947	0.0343569	ssa05	4878093	4884655	LOC106604162	DNA-directed RNA polymerase II subunit RPB7-like%2C transcript variant X1
203	gene10736:100194733	10052.7	-0.209831	0.0696185	-3.01401	0.00257817	0.0274407	ssa05	4885923	4906125	ef-1g	elongation factor 1 gamma
204	gene1077:106604770	105.189	0.308176	0.11124	2.77036	0.0055995	0.0436352	ssa01	49638836	49655298	LOC106604770	tubulin--tyrosine ligase-like%2C transcript variant X2
205	gene1077:106604770	105.189	0.308176	0.11124	2.77036	0.0055995	0.0436352	ssa01	49641584	49655298	LOC106604770	tubulin--tyrosine ligase-like%2C transcript variant X1
206	gene1077:106604770	105.189	0.308176	0.11124	2.77036	0.0055995	0.0436352	ssa01	49640599	49655298	LOC106604770	tubulin--tyrosine ligase-like%2C transcript variant X3
207	gene1081:106604820	23.4717	-0.70495	0.257067	-2.74228	0.00610137	0.0458686	ssa01	49737017	49859823	LOC106604820	regulator of microtubule dynamics protein 2-like%2C transcript variant X1
208	gene1081:106604820	23.4717	-0.70495	0.257067	-2.74228	0.00610137	0.0458686	ssa01	49737017	49859823	LOC106604820	regulator of microtubule dynamics protein 2-like%2C transcript variant X2
209	gene10822:106604183	514.245	-0.422684	0.129333	-3.26819	0.00108238	0.0162772	ssa05	6577943	6581197	LOC106604183	probable E3 ubiquitin-protein ligase MID2
210	gene10827:106604180	20.8774	0.916388	0.323058	2.8366	0.00455961	0.0385289	ssa05	6686671	6705570	LOC106604180	cationic amino acid transporter 2-like%2C transcript variant X2
211	gene10827:106604180	20.8774	0.916388	0.323058	2.8366	0.00455961	0.0385289	ssa05	6686671	6705979	LOC106604180	cationic amino acid transporter 2-like%2C transcript variant X1
212	gene10827:106604180	20.8774	0.916388	0.323058	2.8366	0.00455961	0.0385289	ssa05	6686671	6705570	LOC106604180	cationic amino acid transporter 2-like%2C transcript variant X5
213	gene10827:106604180	20.8774	0.916388	0.323058	2.8366	0.00455961	0.0385289	ssa05	6686671	6705979	LOC106604180	cationic amino acid transporter 2-like%2C transcript variant X3
214	gene10827:106604180	20.8774	0.916388	0.323058	2.8366	0.00455961	0.0385289	ssa05	6686671	6705966	LOC106604180	cationic amino acid transporter 2-like%2C transcript variant X4
215	gene10836:106604188	717.12	-0.499285	0.170818	-2.92291	0.00346773	0.0327922	ssa05	7289190	7323654	LOC106604188	glycine receptor subunit alphaZ1-like
216	gene10839:106604205	364.639	-0.433656	0.126186	-3.43664	0.000588988	0.0114072	ssa05	7413874	7442172	LOC106604205	coiled-coil domain-containing protein 69-like%2C transcript variant X4
217	gene10839:106604205	364.639	-0.433656	0.126186	-3.43664	0.000588988	0.0114072	ssa05	7413871	7442172	LOC106604205	coiled-coil domain-containing protein 69-like%2C transcript variant X3
218	gene10839:106604205	364.639	-0.433656	0.126186	-3.43664	0.000588988	0.0114072	ssa05	7413872	7442172	LOC106604205	coiled-coil domain-containing protein 69-like%2C transcript variant X2
219	gene10839:106604205	364.639	-0.433656	0.126186	-3.43664	0.000588988	0.0114072	ssa05	7413869	7442172	LOC106604205	coiled-coil domain-containing protein 69-like%2C transcript variant X1
220	gene10842:106604202	196.255	-0.468229	0.101374	-4.61882	3.85922e-06	0.000607682	ssa05	7587555	7594476	b4galt7	xylosylprotein beta 1%2C4-galactosyltransferase%2C polypeptide 7%2C transcript variant X3
221	gene10842:106604202	196.255	-0.468229	0.101374	-4.61882	3.85922e-06	0.000607682	ssa05	7587555	7594475	b4galt7	xylosylprotein beta 1%2C4-galactosyltransferase%2C polypeptide 7%2C transcript variant X4
222	gene10842:106604202	196.255	-0.468229	0.101374	-4.61882	3.85922e-06	0.000607682	ssa05	7587555	7593838	b4galt7	xylosylprotein beta 1%2C4-galactosyltransferase%2C polypeptide 7%2C transcript variant X5
223	gene10842:106604202	196.255	-0.468229	0.101374	-4.61882	3.85922e-06	0.000607682	ssa05	7587555	7594478	b4galt7	xylosylprotein beta 1%2C4-galactosyltransferase%2C polypeptide 7%2C transcript variant X1
224	gene10842:106604202	196.255	-0.468229	0.101374	-4.61882	3.85922e-06	0.000607682	ssa05	7587555	7594476	b4galt7	xylosylprotein beta 1%2C4-galactosyltransferase%2C polypeptide 7%2C transcript variant X2
225	gene10843:106604203	3747.76	-0.171161	0.0623459	-2.74535	0.00604468	0.0456438	ssa05	7594861	7598928	LOC106604203	transmembrane emp24 domain-containing protein 9-like
226	gene10858:106604209	349.105	-0.427476	0.0980154	-4.36132	1.29281e-05	0.00124229	ssa05	7824670	7829287	LOC106604209	ATP synthase subunit O%2C mitochondrial-like%2C transcript variant X3
227	gene10858:106604209	349.105	-0.427476	0.0980154	-4.36132	1.29281e-05	0.00124229	ssa05	7824670	7827222	LOC106604209	ATP synthase subunit O%2C mitochondrial-like%2C transcript variant X1
228	gene10858:106604209	349.105	-0.427476	0.0980154	-4.36132	1.29281e-05	0.00124229	ssa05	7824670	7827235	LOC106604209	ATP synthase subunit O%2C mitochondrial-like%2C transcript variant X2
229	gene10864:106604232	7591.99	-0.455914	0.0887532	-5.13688	2.79339e-07	0.000110278	ssa05	8291276	8298163	LOC106604232	cyclin-G1-like%2C transcript variant X1
230	gene10864:106604232	7591.99	-0.455914	0.0887532	-5.13688	2.79339e-07	0.000110278	ssa05	8291276	8298163	LOC106604232	cyclin-G1-like%2C transcript variant X3
231	gene10867:106604229	2960.29	-0.275481	0.101729	-2.708	0.00676906	0.0489724	ssa05	8341615	8344924	LOC106604229	cytochrome b-c1 complex subunit 8-like%2C transcript variant X2
232	gene10867:106604229	2960.29	-0.275481	0.101729	-2.708	0.00676906	0.0489724	ssa05	8341527	8344924	LOC106604229	cytochrome b-c1 complex subunit 8-like%2C transcript variant X1
233	gene10869:106604227	457.016	-0.321311	0.0892853	-3.5987	0.000319815	0.00768601	ssa05	8360346	8364638	LOC106604227	glucosamine-6-phosphate isomerase 1%2C transcript variant X1
234	gene10869:106604227	457.016	-0.321311	0.0892853	-3.5987	0.000319815	0.00768601	ssa05	8360476	8364638	LOC106604227	glucosamine-6-phosphate isomerase 1%2C transcript variant X2
235	gene10870:106604226	1715.64	-0.276317	0.0806285	-3.42704	0.000610209	0.0116437	ssa05	8364695	8378938	LOC106604226	NEDD4 family-interacting protein 1-like%2C transcript variant X2
236	gene10870:106604226	1715.64	-0.276317	0.0806285	-3.42704	0.000610209	0.0116437	ssa05	8364695	8380722	LOC106604226	NEDD4 family-interacting protein 1-like%2C transcript variant X1
237	gene1088:106604898	68.0694	0.401588	0.135828	2.95659	0.00311057	0.0305242	ssa01	50241486	50308712	LOC106604898	TATA-binding protein-associated factor 172-like
238	gene10880:106604237	17.0958	0.654421	0.229819	2.84755	0.00440566	0.0376784	ssa05	9116694	9175899	LOC106604237	gamma-aminobutyric acid receptor subunit beta-2-like
239	gene10881:106604238	10.1324	0.790434	0.244171	3.23721	0.00120704	0.0173513	ssa05	9218482	9233619	LOC106604238	rho guanine nucleotide exchange factor 9-like
240	gene10885:106604256	24.0289	0.751291	0.180935	4.15227	3.29193e-05	0.00210167	ssa05	9564944	9592223	LOC106604256	FH2 domain-containing protein 1-like
241	gene10894:106604246	230.53	0.411668	0.139201	2.95735	0.00310291	0.0304889	ssa05	9779025	9804970	LOC106604246	proteoglycan 4-like%2C transcript variant X1
242	gene10894:106604246	230.53	0.411668	0.139201	2.95735	0.00310291	0.0304889	ssa05	9779025	9804971	LOC106604246	proteoglycan 4-like%2C transcript variant X3
243	gene10894:106604246	230.53	0.411668	0.139201	2.95735	0.00310291	0.0304889	ssa05	9779025	9804971	LOC106604246	proteoglycan 4-like%2C transcript variant X2
244	gene10896:106604244	30.1413	0.551642	0.181367	3.04157	0.00235347	0.025979	ssa05	9811559	9822801	LOC106604244	ras-related protein Rab-9B-like
245	gene10912:106604273	38.6842	0.503217	0.164234	3.06403	0.00218378	0.0247548	ssa05	10711505	10729544	LOC106604273	rho guanine nucleotide exchange factor 9-like
246	gene10927:106604289	60.8496	-0.653444	0.220536	-2.96298	0.00304672	0.0302145	ssa05	11227655	11235652	LOC106604289	transcription factor COE1-like%2C transcript variant X4
247	gene10927:106604289	60.8496	-0.653444	0.220536	-2.96298	0.00304672	0.0302145	ssa05	11227655	11235949	LOC106604289	transcription factor COE1-like%2C transcript variant X1
248	gene10927:106604289	60.8496	-0.653444	0.220536	-2.96298	0.00304672	0.0302145	ssa05	11227655	11235950	LOC106604289	transcription factor COE1-like%2C transcript variant X2
249	gene10927:106604289	60.8496	-0.653444	0.220536	-2.96298	0.00304672	0.0302145	ssa05	11226341	11235948	LOC106604289	transcription factor COE1-like%2C transcript variant X5
250	gene10927:106604289	60.8496	-0.653444	0.220536	-2.96298	0.00304672	0.0302145	ssa05	11227655	11235652	LOC106604289	transcription factor COE1-like%2C transcript variant X3
251	gene10935:100196005	371.704	-0.206523	0.068456	-3.01688	0.00255393	0.0272837	ssa05	11603232	11605504	psd10	26S proteasome non-ATPase regulatory subunit 10
252	gene10948:100194649	15133.5	-0.337839	0.11053	-3.05653	0.00223914	0.0251089	ssa05	11974909	11977963	LOC100194649	ribosomal protein L26
253	gene10952:106604312	148.94	0.549526	0.159409	3.44727	0.000566289	0.0111368	ssa05	12270179	12297847	LOC106604312	ankyrin repeat and KH domain-containing protein 1-like
254	gene10953:106604313	101.576	0.377925	0.11849	3.1895	0.00142521	0.0190618	ssa05	12306302	12312635	LOC106604313	protein RMD5 homolog B-like
255	gene10956:106604317	360.894	-0.348425	0.0837864	-4.1585	3.20351e-05	0.00207638	ssa05	12375343	12380499	LOC106604317	proheparin-binding EGF-like growth factor%2C transcript variant X1
256	gene10956:106604317	360.894	-0.348425	0.0837864	-4.1585	3.20351e-05	0.00207638	ssa05	12375343	12384518	LOC106604317	proheparin-binding EGF-like growth factor%2C transcript variant X2
257	gene1096:106604940	99.6274	-0.397391	0.136657	-2.90794	0.00363821	0.0336358	ssa01	50861762	51150016	LOC106604940	adhesion G protein-coupled receptor A3-like%2C transcript variant X2
258	gene1096:106604940	99.6274	-0.397391	0.136657	-2.90794	0.00363821	0.0336358	ssa01	50861762	51150016	LOC106604940	adhesion G protein-coupled receptor A3-like%2C transcript variant X1
259	gene10970:106604332	36.7724	0.793307	0.15756	5.03496	4.7796e-07	0.000158669	ssa05	12956961	12960587	LOC106604332	beta-2 adrenergic receptor-like%2C transcript variant X2
260	gene10991:106604350	201.533	0.367081	0.117631	3.12062	0.0018047	0.0219193	ssa05	14064791	14087859	LOC106604350	LON peptidase N-terminal domain and RING finger protein 1-like%2C transcript variant X2
261	gene10991:106604350	201.533	0.367081	0.117631	3.12062	0.0018047	0.0219193	ssa05	14064791	14087859	LOC106604350	LON peptidase N-terminal domain and RING finger protein 1-like%2C transcript variant X1
262	gene11003:106604399	427.387	-0.226419	0.061359	-3.69007	0.000224192	0.00627481	ssa05	15424644	15430560	LOC106604399	transcriptional activator protein Pur-alpha-like
263	gene11024:106604383	78.9805	0.355034	0.110361	3.21703	0.00129527	0.0180051	ssa05	15710814	15720758	LOC106604383	uncharacterized LOC106604383
264	gene11026:106604384	486.944	0.247086	0.0874901	2.82415	0.00474055	0.0394034	ssa05	15728611	15743133	LOC106604384	EH domain-containing protein 1-like%2C transcript variant X1
265	gene11026:106604384	486.944	0.247086	0.0874901	2.82415	0.00474055	0.0394034	ssa05	15728611	15742939	LOC106604384	EH domain-containing protein 1-like%2C transcript variant X2
266	gene11027:100306750	746.308	-0.249334	0.0751986	-3.31568	0.000914217	0.0146989	ssa05	15747538	15751273	saks1	SAPK substrate protein 1%2C transcript variant X1
267	gene11027:100306750	746.308	-0.249334	0.0751986	-3.31568	0.000914217	0.0146989	ssa05	15747643	15751243	saks1	SAPK substrate protein 1
268	gene11084:106604494	309.721	-0.479553	0.125221	-3.82965	0.000128324	0.00449028	ssa05	18503595	18515507	gpc2	glypican 2%2C transcript variant X1
269	gene11084:106604494	309.721	-0.479553	0.125221	-3.82965	0.000128324	0.00449028	ssa05	18503595	18515501	gpc2	glypican 2%2C transcript variant X2
270	gene11097:106604484	230.18	-0.291772	0.104341	-2.79634	0.00516852	0.0415388	ssa05	19111175	19114124	hs3st1	heparan sulfate (glucosamine) 3-O-sulfotransferase 1%2C transcript variant X1
271	gene11097:106604484	230.18	-0.291772	0.104341	-2.79634	0.00516852	0.0415388	ssa05	19111175	19114124	hs3st1	heparan sulfate (glucosamine) 3-O-sulfotransferase 1%2C transcript variant X2
272	gene1110:100286448	1707.22	-0.360759	0.0825989	-4.3676	1.25617e-05	0.00122403	ssa01	52119523	52128533	cj057	CJ057 protein%2C transcript variant X1
273	gene1110:100286448	1707.22	-0.360759	0.0825989	-4.3676	1.25617e-05	0.00122403	ssa01	52119529	52129536	cj057	CJ057 protein
274	gene11121:106604457	720.599	-0.354746	0.116657	-3.04094	0.00235842	0.0260106	ssa05	20774658	20778442	LOC106604457	magnesium transporter NIPA2-like%2C transcript variant X2
275	gene11121:106604457	720.599	-0.354746	0.116657	-3.04094	0.00235842	0.0260106	ssa05	20774254	20778442	LOC106604457	magnesium transporter NIPA2-like%2C transcript variant X1
276	gene11121:106604457	720.599	-0.354746	0.116657	-3.04094	0.00235842	0.0260106	ssa05	20774440	20778442	LOC106604457	magnesium transporter NIPA2-like%2C transcript variant X3
277	gene11121:106604457	720.599	-0.354746	0.116657	-3.04094	0.00235842	0.0260106	ssa05	20774254	20778442	LOC106604457	magnesium transporter NIPA2-like%2C transcript variant X4
278	gene1113:106605086	5551.25	-0.72316	0.169355	-4.27007	1.9541e-05	0.00161231	ssa01	52161700	52165052	LOC106605086	GTP cyclohydrolase 1-like
279	gene11133:100195873	424.31	-0.360805	0.0930854	-3.87606	0.00010616	0.00403087	ssa05	22632127	22638559	ube2a	ubiquitin-conjugating enzyme E2A (RAD6 homolog)
280	gene11134:106604447	223.568	0.226562	0.0828111	2.73589	0.00622112	0.0464798	ssa05	22638752	22641936	LOC106604447	NF-kappa-B-repressing factor-like%2C transcript variant X2
281	gene11134:106604447	223.568	0.226562	0.0828111	2.73589	0.00622112	0.0464798	ssa05	22638752	22643653	LOC106604447	NF-kappa-B-repressing factor-like%2C transcript variant X1
282	gene11138:100195986	30912.5	-0.385617	0.10216	-3.77463	0.000160244	0.00510654	ssa05	22693361	22694483	rl39	60S ribosomal protein L39
283	gene11138:100195986	30912.5	-0.385617	0.10216	-3.77463	0.000160244	0.00510654	ssa05	22693073	22694585	rl39	60S ribosomal protein L39%2C transcript variant X1
284	gene11140:106604444	3964.19	-0.304451	0.10615	-2.86813	0.00412906	0.0363326	ssa05	22703605	22704515	LOC106604444	NADH dehydrogenase [ubiquinone] 1 alpha subcomplex subunit 1-like
285	gene11147:106604435	127.383	0.268362	0.0982234	2.73216	0.00629201	0.0467829	ssa05	22771739	22794547	LOC106604435	cullin-4B-like%2C transcript variant X2
286	gene11147:106604435	127.383	0.268362	0.0982234	2.73216	0.00629201	0.0467829	ssa05	22771739	22794198	LOC106604435	cullin-4B-like%2C transcript variant X1
287	gene11164:106604545	636.206	-0.401838	0.133962	-2.99963	0.00270306	0.0281858	ssa05	23687733	23841764	LOC106604545	LIM and calponin homology domains-containing protein 1-like%2C transcript variant X7
288	gene11164:106604545	636.206	-0.401838	0.133962	-2.99963	0.00270306	0.0281858	ssa05	23687733	23841764	LOC106604545	LIM and calponin homology domains-containing protein 1-like%2C transcript variant X2
289	gene11164:106604545	636.206	-0.401838	0.133962	-2.99963	0.00270306	0.0281858	ssa05	23789583	23841764	LOC106604545	LIM and calponin homology domains-containing protein 1-like%2C transcript variant X10
290	gene11164:106604545	636.206	-0.401838	0.133962	-2.99963	0.00270306	0.0281858	ssa05	23752630	23841764	LOC106604545	LIM and calponin homology domains-containing protein 1-like%2C transcript variant X11
291	gene11164:106604545	636.206	-0.401838	0.133962	-2.99963	0.00270306	0.0281858	ssa05	23687732	23841764	LOC106604545	LIM and calponin homology domains-containing protein 1-like%2C transcript variant X4
292	gene11164:106604545	636.206	-0.401838	0.133962	-2.99963	0.00270306	0.0281858	ssa05	23687734	23841764	LOC106604545	LIM and calponin homology domains-containing protein 1-like%2C transcript variant X9
293	gene11164:106604545	636.206	-0.401838	0.133962	-2.99963	0.00270306	0.0281858	ssa05	23687733	23841764	LOC106604545	LIM and calponin homology domains-containing protein 1-like%2C transcript variant X5
294	gene11164:106604545	636.206	-0.401838	0.133962	-2.99963	0.00270306	0.0281858	ssa05	23687733	23841764	LOC106604545	LIM and calponin homology domains-containing protein 1-like%2C transcript variant X1
295	gene11164:106604545	636.206	-0.401838	0.133962	-2.99963	0.00270306	0.0281858	ssa05	23687734	23841764	LOC106604545	LIM and calponin homology domains-containing protein 1-like%2C transcript variant X6
296	gene11164:106604545	636.206	-0.401838	0.133962	-2.99963	0.00270306	0.0281858	ssa05	23687732	23841764	LOC106604545	LIM and calponin homology domains-containing protein 1-like%2C transcript variant X3
297	gene11164:106604545	636.206	-0.401838	0.133962	-2.99963	0.00270306	0.0281858	ssa05	23687734	23841764	LOC106604545	LIM and calponin homology domains-containing protein 1-like%2C transcript variant X8
298	gene11175:106604538	223.543	-0.290043	0.0911618	-3.18163	0.00146448	0.0193888	ssa05	24151889	24176450	LOC106604538	transmembrane anterior posterior transformation protein 1 homolog%2C transcript variant X3
299	gene11175:106604538	223.543	-0.290043	0.0911618	-3.18163	0.00146448	0.0193888	ssa05	24151889	24190409	LOC106604538	transmembrane anterior posterior transformation protein 1 homolog%2C transcript variant X1
300	gene11175:106604538	223.543	-0.290043	0.0911618	-3.18163	0.00146448	0.0193888	ssa05	24151889	24190409	LOC106604538	transmembrane anterior posterior transformation protein 1 homolog%2C transcript variant X2
301	gene11175:106604538	223.543	-0.290043	0.0911618	-3.18163	0.00146448	0.0193888	ssa05	24151889	24176450	LOC106604538	transmembrane anterior posterior transformation protein 1 homolog%2C transcript variant X4
302	gene11177:106604536	123.981	0.561508	0.199793	2.81045	0.00494725	0.040459	ssa05	24327250	24337700	LOC106604536	dihydropteridine reductase-like
303	gene1118:106605143	8428.91	-0.202189	0.0576853	-3.50504	0.000456543	0.00965669	ssa01	52331455	52335560	LOC106605143	calmodulin
304	gene11220:106604573	197.999	-0.306422	0.0890814	-3.4398	0.000582145	0.0113192	ssa05	27470944	27491714	LOC106604573	protocadherin-12-like
305	gene11222:106604576	28.3638	0.489433	0.156851	3.12037	0.00180625	0.0219207	ssa05	27557342	27602293	LOC106604576	gamma-aminobutyric acid receptor subunit alpha-2-like%2C transcript variant X4
306	gene11222:106604576	28.3638	0.489433	0.156851	3.12037	0.00180625	0.0219207	ssa05	27545868	27597610	LOC106604576	gamma-aminobutyric acid receptor subunit alpha-2-like%2C transcript variant X6
307	gene11222:106604576	28.3638	0.489433	0.156851	3.12037	0.00180625	0.0219207	ssa05	27545868	27597796	LOC106604576	gamma-aminobutyric acid receptor subunit alpha-2-like%2C transcript variant X5
308	gene11222:106604576	28.3638	0.489433	0.156851	3.12037	0.00180625	0.0219207	ssa05	27545868	27602293	LOC106604576	gamma-aminobutyric acid receptor subunit alpha-2-like%2C transcript variant X1
309	gene11222:106604576	28.3638	0.489433	0.156851	3.12037	0.00180625	0.0219207	ssa05	27545868	27602662	LOC106604576	gamma-aminobutyric acid receptor subunit alpha-2-like%2C transcript variant X2
310	gene11222:106604576	28.3638	0.489433	0.156851	3.12037	0.00180625	0.0219207	ssa05	27545868	27602636	LOC106604576	gamma-aminobutyric acid receptor subunit alpha-2-like%2C transcript variant X3
311	gene11227:106604581	43.0999	-0.539065	0.169404	-3.18213	0.00146197	0.0193736	ssa05	27918049	27922460	LOC106604581	transcription factor LBX1-like
312	gene11230:106604595	1041.53	-0.252594	0.071017	-3.55681	0.00037538	0.0085259	ssa05	28063250	28085652	LOC106604595	nucleophosmin-like
313	gene11259:106604630	537.893	0.618589	0.151886	4.07273	4.64646e-05	0.00248403	ssa05	29283904	29341106	LOC106604630	complexin-1-like%2C transcript variant X1
314	gene11259:106604630	537.893	0.618589	0.151886	4.07273	4.64646e-05	0.00248403	ssa05	29283904	29339984	LOC106604630	complexin-1-like%2C transcript variant X3
315	gene11259:106604630	537.893	0.618589	0.151886	4.07273	4.64646e-05	0.00248403	ssa05	29283904	29361798	LOC106604630	complexin-1-like%2C transcript variant X2
316	gene11268:106604798	54.3528	0.867671	0.196524	4.41508	1.00971e-05	0.00108563	ssa05	29556717	29558246	LOC106604798	probable pancreatic secretory proteinase inhibitor%2C transcript variant X1
317	gene11268:106604798	54.3528	0.867671	0.196524	4.41508	1.00971e-05	0.00108563	ssa05	29556707	29558248	LOC106604798	probable pancreatic secretory proteinase inhibitor%2C transcript variant X2
318	gene11282:106604646	328.636	-0.312137	0.0874477	-3.56941	0.000357784	0.00828186	ssa05	29862242	29964015	LOC106604646	transcription factor COE3-like%2C transcript variant X7
319	gene11282:106604646	328.636	-0.312137	0.0874477	-3.56941	0.000357784	0.00828186	ssa05	29862242	29964016	LOC106604646	transcription factor COE3-like%2C transcript variant X5
320	gene11282:106604646	328.636	-0.312137	0.0874477	-3.56941	0.000357784	0.00828186	ssa05	29862242	29964018	LOC106604646	transcription factor COE3-like%2C transcript variant X4
321	gene11282:106604646	328.636	-0.312137	0.0874477	-3.56941	0.000357784	0.00828186	ssa05	29862242	29964016	LOC106604646	transcription factor COE3-like%2C transcript variant X8
322	gene11282:106604646	328.636	-0.312137	0.0874477	-3.56941	0.000357784	0.00828186	ssa05	29862242	29964018	LOC106604646	transcription factor COE3-like%2C transcript variant X1
323	gene11282:106604646	328.636	-0.312137	0.0874477	-3.56941	0.000357784	0.00828186	ssa05	29862242	29964017	LOC106604646	transcription factor COE3-like%2C transcript variant X3
324	gene11282:106604646	328.636	-0.312137	0.0874477	-3.56941	0.000357784	0.00828186	ssa05	29862242	29964015	LOC106604646	transcription factor COE3-like%2C transcript variant X6
325	gene11282:106604646	328.636	-0.312137	0.0874477	-3.56941	0.000357784	0.00828186	ssa05	29862242	29964018	LOC106604646	transcription factor COE3-like%2C transcript variant X2
326	gene11304:106604665	229.032	0.484167	0.12807	3.78048	0.000156526	0.00502655	ssa05	30284824	30317128	LOC106604665	large neutral amino acids transporter small subunit 3-like%2C transcript variant X1
327	gene11304:106604665	229.032	0.484167	0.12807	3.78048	0.000156526	0.00502655	ssa05	30284824	30317128	LOC106604665	large neutral amino acids transporter small subunit 3-like%2C transcript variant X2
328	gene11353:106604704	463.651	0.278855	0.0789661	3.53133	0.000413476	0.00904253	ssa05	32309690	32317647	foxo4	forkhead box O4
329	gene11356:100194844	1117.05	0.189083	0.0546093	3.46247	0.000535234	0.010715	ssa05	32349488	32356353	ubl3	ubiquitin-like 3
330	gene11356:100194844	1117.05	0.189083	0.0546093	3.46247	0.000535234	0.010715	ssa05	32349457	32356353	ubl3	ubiquitin-like 3%2C transcript variant X1
331	gene1139:106605759	145.904	0.373102	0.124003	3.00881	0.00262271	0.0277182	ssa01	53634026	53677530	LOC106605759	E3 ubiquitin-protein ligase UBR2-like%2C transcript variant X3
332	gene1139:106605759	145.904	0.373102	0.124003	3.00881	0.00262271	0.0277182	ssa01	53634026	53677530	LOC106605759	E3 ubiquitin-protein ligase UBR2-like%2C transcript variant X1
333	gene1139:106605759	145.904	0.373102	0.124003	3.00881	0.00262271	0.0277182	ssa01	53634026	53677530	LOC106605759	E3 ubiquitin-protein ligase UBR2-like%2C transcript variant X2
334	gene1139:106605759	145.904	0.373102	0.124003	3.00881	0.00262271	0.0277182	ssa01	53634026	53677530	LOC106605759	E3 ubiquitin-protein ligase UBR2-like%2C transcript variant X4
335	gene11394:106604742	594.219	-0.449881	0.132876	-3.38571	0.000709934	0.0127238	ssa05	33663425	33668452	LOC106604742	zinc finger protein ZIC 3-like
336	gene11401:106604748	135.633	-0.637141	0.16018	-3.97765	6.96011e-05	0.00314262	ssa05	33886293	33893855	LOC106604748	transcription cofactor vestigial-like protein 2%2C transcript variant X2
337	gene11401:106604748	135.633	-0.637141	0.16018	-3.97765	6.96011e-05	0.00314262	ssa05	33886293	33893855	LOC106604748	transcription cofactor vestigial-like protein 2%2C transcript variant X1
338	gene11401:106604748	135.633	-0.637141	0.16018	-3.97765	6.96011e-05	0.00314262	ssa05	33886293	33893855	LOC106604748	transcription cofactor vestigial-like protein 2%2C transcript variant X3
339	gene11404:106604750	446.646	-0.228664	0.0789233	-2.89729	0.00376401	0.0343714	ssa05	33937543	33973477	LOC106604750	ensconsin-like%2C transcript variant X2
340	gene11404:106604750	446.646	-0.228664	0.0789233	-2.89729	0.00376401	0.0343714	ssa05	33937544	33973477	LOC106604750	ensconsin-like%2C transcript variant X10
341	gene11404:106604750	446.646	-0.228664	0.0789233	-2.89729	0.00376401	0.0343714	ssa05	33937544	33973477	LOC106604750	ensconsin-like%2C transcript variant X7
342	gene11404:106604750	446.646	-0.228664	0.0789233	-2.89729	0.00376401	0.0343714	ssa05	33937544	33973477	LOC106604750	ensconsin-like%2C transcript variant X8
343	gene11404:106604750	446.646	-0.228664	0.0789233	-2.89729	0.00376401	0.0343714	ssa05	33937544	33973477	LOC106604750	ensconsin-like%2C transcript variant X3
344	gene11404:106604750	446.646	-0.228664	0.0789233	-2.89729	0.00376401	0.0343714	ssa05	33937544	33973477	LOC106604750	ensconsin-like%2C transcript variant X9
345	gene11404:106604750	446.646	-0.228664	0.0789233	-2.89729	0.00376401	0.0343714	ssa05	33937544	33973477	LOC106604750	ensconsin-like%2C transcript variant X6
346	gene11404:106604750	446.646	-0.228664	0.0789233	-2.89729	0.00376401	0.0343714	ssa05	33937544	33973477	LOC106604750	ensconsin-like%2C transcript variant X4
347	gene11404:106604750	446.646	-0.228664	0.0789233	-2.89729	0.00376401	0.0343714	ssa05	33937544	33973477	LOC106604750	ensconsin-like%2C transcript variant X5
348	gene11404:106604750	446.646	-0.228664	0.0789233	-2.89729	0.00376401	0.0343714	ssa05	33937544	33973477	LOC106604750	ensconsin-like%2C transcript variant X1
349	gene11405:100196873	1206.22	-0.296251	0.108955	-2.71901	0.00654777	0.0479922	ssa05	33973521	33990166	fhl1	Four and a half LIM domains protein 1
350	gene11405:100196873	1206.22	-0.296251	0.108955	-2.71901	0.00654777	0.0479922	ssa05	33973517	33983249	fhl1	Four and a half LIM domains protein 1%2C transcript variant X1
351	gene11405:100196873	1206.22	-0.296251	0.108955	-2.71901	0.00654777	0.0479922	ssa05	33973517	33990257	fhl1	Four and a half LIM domains protein 1%2C transcript variant X2
352	gene11408:106604752	32.6525	0.557422	0.202739	2.74946	0.00596939	0.0453067	ssa05	34032875	34044798	LOC106604752	DNA ligase 1-like
353	gene11426:100194508	1451.98	-0.343862	0.0948091	-3.62688	0.000286861	0.00722717	ssa05	34585714	34609413	ube2d2	ubiquitin-conjugating enzyme E2D 2 (UBC4/5 homolog%2C yeast)%2C transcript variant X2
354	gene11426:100194508	1451.98	-0.343862	0.0948091	-3.62688	0.000286861	0.00722717	ssa05	34585714	34608106	ube2d2	ubiquitin-conjugating enzyme E2D 2 (UBC4/5 homolog%2C yeast)%2C transcript variant X1
355	gene11426:100194508	1451.98	-0.343862	0.0948091	-3.62688	0.000286861	0.00722717	ssa05	34585716	34608079	ube2d2	ubiquitin-conjugating enzyme E2D 2 (UBC4/5 homolog%2C yeast)
356	gene11430:106604773	808.623	-0.195359	0.065641	-2.97617	0.0029187	0.0294908	ssa05	34672931	34678449	LOC106604773	39S ribosomal protein L18%2C mitochondrial-like%2C transcript variant X1
357	gene11430:106604773	808.623	-0.195359	0.065641	-2.97617	0.0029187	0.0294908	ssa05	34672930	34678449	LOC106604773	39S ribosomal protein L18%2C mitochondrial-like%2C transcript variant X2
358	gene1144:106605823	469.871	-0.258088	0.0893311	-2.88911	0.00386333	0.0349482	ssa01	54052745	54066014	LOC106605823	protein YIPF3-like%2C transcript variant X2
359	gene1144:106605823	469.871	-0.258088	0.0893311	-2.88911	0.00386333	0.0349482	ssa01	54052746	54066014	LOC106605823	protein YIPF3-like%2C transcript variant X1
360	gene11446:106604788	130.622	0.609173	0.160134	3.80415	0.000142292	0.00476119	ssa05	34964981	35204297	LOC106604788	testican-1-like%2C transcript variant X1
361	gene11446:106604788	130.622	0.609173	0.160134	3.80415	0.000142292	0.00476119	ssa05	34964981	35204297	LOC106604788	testican-1-like%2C transcript variant X2
362	gene1148:106605853	93.9499	-0.718573	0.146804	-4.89479	9.8409e-07	0.000265322	ssa01	54268100	54296632	LOC106605853	protein delta homolog 2-like%2C transcript variant X2
363	gene1148:106605853	93.9499	-0.718573	0.146804	-4.89479	9.8409e-07	0.000265322	ssa01	54279071	54296632	LOC106605853	protein delta homolog 2-like%2C transcript variant X4
364	gene1148:106605853	93.9499	-0.718573	0.146804	-4.89479	9.8409e-07	0.000265322	ssa01	54267202	54296632	LOC106605853	protein delta homolog 2-like%2C transcript variant X5
365	gene1148:106605853	93.9499	-0.718573	0.146804	-4.89479	9.8409e-07	0.000265322	ssa01	54280403	54296632	LOC106605853	protein delta homolog 2-like%2C transcript variant X6
366	gene1148:106605853	93.9499	-0.718573	0.146804	-4.89479	9.8409e-07	0.000265322	ssa01	54267203	54296632	LOC106605853	protein delta homolog 2-like%2C transcript variant X3
367	gene1148:106605853	93.9499	-0.718573	0.146804	-4.89479	9.8409e-07	0.000265322	ssa01	54276008	54296632	LOC106605853	protein delta homolog 2-like%2C transcript variant X1
368	gene11493:106604826	94.8496	0.381308	0.128826	2.95987	0.00307774	0.0303638	ssa05	36219571	36371255	LOC106604826	dedicator of cytokinesis protein 2-like
369	gene1152:106605890	195.199	0.303434	0.0999873	3.03473	0.00240752	0.0263428	ssa01	54318237	54373382	LOC106605890	serine/threonine-protein phosphatase 2A 56 kDa regulatory subunit delta isoform
370	gene11542:106604833	145.255	0.386477	0.122961	3.14308	0.00167178	0.0209678	ssa05	37593024	37796434	LOC106604833	A disintegrin and metalloproteinase with thrombospondin motifs 2-like
371	gene11552:106604911	110.188	-0.384158	0.138893	-2.76585	0.00567738	0.043978	ssa05	38857467	38861411	LOC106604911	rho GTPase-activating protein 24-like
372	gene11566:106604923	377.853	-0.258951	0.0700489	-3.69672	0.000218399	0.00618819	ssa05	39369304	39383018	LOC106604923	spondin-2-like
373	gene1157:106605956	50.7864	0.374497	0.116373	3.21807	0.00129057	0.0179797	ssa01	54468007	54507018	LOC106605956	synapse differentiation-inducing gene protein 1-like%2C transcript variant X2
374	gene1157:106605956	50.7864	0.374497	0.116373	3.21807	0.00129057	0.0179797	ssa01	54472697	54507018	LOC106605956	synapse differentiation-inducing gene protein 1-like%2C transcript variant X3
375	gene1157:106605956	50.7864	0.374497	0.116373	3.21807	0.00129057	0.0179797	ssa01	54471290	54507018	LOC106605956	synapse differentiation-inducing gene protein 1-like%2C transcript variant X1
376	gene11571:106604927	99.4882	0.293894	0.0901189	3.26119	0.00110947	0.0164893	ssa05	39646868	39655633	LOC106604927	Down syndrome cell adhesion molecule-like
377	gene11592:106604945	141.612	0.343866	0.104035	3.30529	0.000948766	0.0150038	ssa05	40838754	40855822	fbxo38	F-box protein 38%2C transcript variant X2
378	gene11592:106604945	141.612	0.343866	0.104035	3.30529	0.000948766	0.0150038	ssa05	40838754	40855821	fbxo38	F-box protein 38%2C transcript variant X4
379	gene11592:106604945	141.612	0.343866	0.104035	3.30529	0.000948766	0.0150038	ssa05	40838754	40855821	fbxo38	F-box protein 38%2C transcript variant X3
380	gene11592:106604945	141.612	0.343866	0.104035	3.30529	0.000948766	0.0150038	ssa05	40838754	40855822	fbxo38	F-box protein 38%2C transcript variant X1
381	gene11596:106604950	649.265	0.235172	0.0781768	3.0082	0.00262801	0.0277351	ssa05	40946851	40961798	LOC106604950	stress-70 protein%2C mitochondrial
382	gene11609:106604958	265.614	-0.423261	0.139272	-3.03909	0.00237294	0.0260947	ssa05	41829544	42000972	LOC106604958	AF4/FMR2 family member 2-like%2C transcript variant X3
383	gene11609:106604958	265.614	-0.423261	0.139272	-3.03909	0.00237294	0.0260947	ssa05	41823763	42000972	LOC106604958	AF4/FMR2 family member 2-like%2C transcript variant X1
384	gene11609:106604958	265.614	-0.423261	0.139272	-3.03909	0.00237294	0.0260947	ssa05	41829544	42000972	LOC106604958	AF4/FMR2 family member 2-like%2C transcript variant X2
385	gene11617:100195081	51.9645	-0.733706	0.23472	-3.12588	0.00177274	0.0216758	ssa05	43335607	43340360	s22a4	Solute carrier family 22 member 4
386	gene11618:106604975	541.073	-0.461509	0.0996558	-4.63103	3.63857e-06	0.000595455	ssa05	43369951	43377649	LOC106604975	protein atonal homolog 8-like
387	gene11619:106604972	342.792	-0.287665	0.0955275	-3.01133	0.00260107	0.0275594	ssa05	43536606	43723072	LOC106604972	fibroblast growth factor receptor-like 1
388	gene11625:100195081	28.7994	-0.595661	0.219701	-2.71124	0.00670316	0.0486534	ssa05	44358334	44359462	s22a4	Solute carrier family 22 member 4
389	gene11642:106605010	114.848	-0.336944	0.120956	-2.78567	0.00534171	0.0424122	ssa05	45295725	45334077	LOC106605010	phosphatase and actin regulator 4B-like%2C transcript variant X5
390	gene11642:106605010	114.848	-0.336944	0.120956	-2.78567	0.00534171	0.0424122	ssa05	45308627	45334077	LOC106605010	phosphatase and actin regulator 4B-like%2C transcript variant X2
391	gene11642:106605010	114.848	-0.336944	0.120956	-2.78567	0.00534171	0.0424122	ssa05	45256634	45334077	LOC106605010	phosphatase and actin regulator 4B-like%2C transcript variant X3
392	gene11642:106605010	114.848	-0.336944	0.120956	-2.78567	0.00534171	0.0424122	ssa05	45300134	45334077	LOC106605010	phosphatase and actin regulator 4B-like%2C transcript variant X7
393	gene11642:106605010	114.848	-0.336944	0.120956	-2.78567	0.00534171	0.0424122	ssa05	45300133	45334077	LOC106605010	phosphatase and actin regulator 4B-like%2C transcript variant X1
394	gene11642:106605010	114.848	-0.336944	0.120956	-2.78567	0.00534171	0.0424122	ssa05	45300131	45334077	LOC106605010	phosphatase and actin regulator 4B-like%2C transcript variant X6
395	gene11642:106605010	114.848	-0.336944	0.120956	-2.78567	0.00534171	0.0424122	ssa05	45277925	45334077	LOC106605010	phosphatase and actin regulator 4B-like%2C transcript variant X4
396	gene11642:106605010	114.848	-0.336944	0.120956	-2.78567	0.00534171	0.0424122	ssa05	45308094	45334077	LOC106605010	phosphatase and actin regulator 4B-like%2C transcript variant X8
397	gene11655:106605021	270.037	0.441346	0.109681	4.02389	5.72448e-05	0.00278974	ssa05	45850610	45881799	LOC106605021	transforming growth factor beta-2-like
398	gene11660:100195842	539.305	-0.462582	0.122598	-3.77316	0.000161196	0.00513252	ssa05	46048014	46062295	cnih4	cornichon homolog 4%2C transcript variant X2
399	gene11660:100195842	539.305	-0.462582	0.122598	-3.77316	0.000161196	0.00513252	ssa05	46047326	46062255	cnih4	cornichon homolog 4
400	gene11660:100195842	539.305	-0.462582	0.122598	-3.77316	0.000161196	0.00513252	ssa05	46048014	46062871	cnih4	cornichon homolog 4%2C transcript variant X4
401	gene11660:100195842	539.305	-0.462582	0.122598	-3.77316	0.000161196	0.00513252	ssa05	46048014	46062203	cnih4	cornichon homolog 4%2C transcript variant X3
402	gene11660:100195842	539.305	-0.462582	0.122598	-3.77316	0.000161196	0.00513252	ssa05	46048014	46059101	cnih4	cornichon homolog 4%2C transcript variant X1
403	gene11675:106605025	321.377	0.225449	0.0754701	2.98726	0.00281489	0.0288463	ssa05	46518594	46528300	pnisr	PNN-interacting serine/arginine-rich protein%2C transcript variant X3
404	gene11675:106605025	321.377	0.225449	0.0754701	2.98726	0.00281489	0.0288463	ssa05	46518594	46528300	pnisr	PNN-interacting serine/arginine-rich protein%2C transcript variant X1
405	gene11675:106605025	321.377	0.225449	0.0754701	2.98726	0.00281489	0.0288463	ssa05	46519398	46528300	pnisr	PNN-interacting serine/arginine-rich protein%2C transcript variant X4
406	gene11675:106605025	321.377	0.225449	0.0754701	2.98726	0.00281489	0.0288463	ssa05	46518594	46528300	pnisr	PNN-interacting serine/arginine-rich protein%2C transcript variant X2
407	gene11681:106605048	116.168	-0.305522	0.112575	-2.71394	0.00664891	0.0484593	ssa05	46973607	46979383	LOC106605048	inactive serine protease 35-like
408	gene117:106603281	7.30798	0.911036	0.337632	2.69831	0.00696921	0.0497957	ssa01	4781641	4803475	LOC106603281	prospero homeobox protein 1-like
409	gene1171:106606070	430.64	0.202581	0.0748834	2.70529	0.00682445	0.0492306	ssa01	54827385	54845284	LOC106606070	nuclear factor NF-kappa-B p100 subunit-like%2C transcript variant X3
410	gene1171:106606070	430.64	0.202581	0.0748834	2.70529	0.00682445	0.0492306	ssa01	54827385	54839287	LOC106606070	nuclear factor NF-kappa-B p100 subunit-like%2C transcript variant X4
411	gene1171:106606070	430.64	0.202581	0.0748834	2.70529	0.00682445	0.0492306	ssa01	54827385	54845284	LOC106606070	nuclear factor NF-kappa-B p100 subunit-like%2C transcript variant X2
412	gene1171:106606070	430.64	0.202581	0.0748834	2.70529	0.00682445	0.0492306	ssa01	54827385	54839286	LOC106606070	nuclear factor NF-kappa-B p100 subunit-like%2C transcript variant X1
413	gene1171:106606070	430.64	0.202581	0.0748834	2.70529	0.00682445	0.0492306	ssa01	54827385	54839090	LOC106606070	nuclear factor NF-kappa-B p100 subunit-like%2C transcript variant X5
414	gene11712:106605074	214.435	-0.605436	0.130261	-4.64788	3.35364e-06	0.00057873	ssa05	49334198	49375806	LOC106605074	teashirt homolog 1-like%2C transcript variant X2
415	gene11712:106605074	214.435	-0.605436	0.130261	-4.64788	3.35364e-06	0.00057873	ssa05	49334198	49375807	LOC106605074	teashirt homolog 1-like%2C transcript variant X3
416	gene11712:106605074	214.435	-0.605436	0.130261	-4.64788	3.35364e-06	0.00057873	ssa05	49334198	49374373	LOC106605074	teashirt homolog 1-like%2C transcript variant X1
417	gene11712:106605074	214.435	-0.605436	0.130261	-4.64788	3.35364e-06	0.00057873	ssa05	49334198	49374373	LOC106605074	teashirt homolog 1-like%2C transcript variant X4
418	gene11726:106605088	180.083	0.411234	0.12045	3.41414	0.000639839	0.0120026	ssa05	49719578	49724391	LOC106605088	C-type lectin domain family 4 member E-like
419	gene11736:106605095	70.5498	0.989537	0.240631	4.11227	3.91791e-05	0.00227993	ssa05	49849859	49890875	LOC106605095	calsyntenin-3-like%2C transcript variant X1
420	gene11736:106605095	70.5498	0.989537	0.240631	4.11227	3.91791e-05	0.00227993	ssa05	49849859	49890874	LOC106605095	calsyntenin-3-like%2C transcript variant X2
421	gene11778:100195350	469.784	-0.272459	0.0985987	-2.76331	0.00572177	0.0441735	ssa05	51568073	51598929	nog2	noggin 2
422	gene1178:106606142	2574.92	-0.439676	0.105202	-4.17934	2.92351e-05	0.00197053	ssa01	55055955	55069672	LOC106606142	LIM domain-binding protein 3-like
423	gene11782:106605133	443.717	-0.605223	0.134926	-4.4856	7.27089e-06	0.000876154	ssa05	51768578	51814432	LOC106605133	four and a half LIM domains protein 3-like
424	gene11784:106605135	270.982	-0.399931	0.0877697	-4.5566	5.1989e-06	0.000713624	ssa05	51881163	51884601	LOC106605135	POU domain%2C class 3%2C transcription factor 1-like
425	gene11794:106605182	3449.53	-0.47099	0.147772	-3.18729	0.00143615	0.0191262	ssa05	52378051	52379323	LOC106605182	fatty acid-binding protein 10-A%2C liver basic-like
426	gene11795:106605000	10.8746	-0.733673	0.246127	-2.98087	0.00287432	0.0292315	ssa05	52380034	52386335	LOC106605000	M-protein%2C striated muscle-like
427	gene11817:100195820	25.3274	1.55695	0.382685	4.06848	4.732e-05	0.00249856	ssa05	53365968	53367435	hepc1	Hepcidin-1
428	gene11818:106605158	194.684	0.22358	0.0760135	2.94131	0.00326825	0.031429	ssa05	53377632	53393086	LOC106605158	upstream stimulatory factor 2-like%2C transcript variant X5
429	gene11818:106605158	194.684	0.22358	0.0760135	2.94131	0.00326825	0.031429	ssa05	53377632	53393086	LOC106605158	upstream stimulatory factor 2-like%2C transcript variant X3
430	gene11818:106605158	194.684	0.22358	0.0760135	2.94131	0.00326825	0.031429	ssa05	53377632	53393086	LOC106605158	upstream stimulatory factor 2-like%2C transcript variant X1
431	gene11818:106605158	194.684	0.22358	0.0760135	2.94131	0.00326825	0.031429	ssa05	53377632	53393086	LOC106605158	upstream stimulatory factor 2-like%2C transcript variant X6
432	gene11818:106605158	194.684	0.22358	0.0760135	2.94131	0.00326825	0.031429	ssa05	53377632	53393086	LOC106605158	upstream stimulatory factor 2-like%2C transcript variant X2
433	gene11818:106605158	194.684	0.22358	0.0760135	2.94131	0.00326825	0.031429	ssa05	53377632	53393086	LOC106605158	upstream stimulatory factor 2-like%2C transcript variant X4
434	gene11819:106605159	2012.23	-0.223857	0.0817455	-2.73846	0.00617272	0.0462103	ssa05	53398792	53402969	LOC106605159	electron transfer flavoprotein subunit beta-like%2C transcript variant X3
435	gene11819:106605159	2012.23	-0.223857	0.0817455	-2.73846	0.00617272	0.0462103	ssa05	53393314	53402969	LOC106605159	electron transfer flavoprotein subunit beta-like%2C transcript variant X1
436	gene11819:106605159	2012.23	-0.223857	0.0817455	-2.73846	0.00617272	0.0462103	ssa05	53398760	53402969	LOC106605159	electron transfer flavoprotein subunit beta-like%2C transcript variant X2
437	gene11820:106605160	244.015	0.481416	0.152138	3.16433	0.00155442	0.0200804	ssa05	53403512	53410024	vsig10l	V-set and immunoglobulin domain containing 10 like
438	gene11847:106605230	156.378	0.66462	0.126398	5.25814	1.45519e-07	7.33411e-05	ssa05	54054017	54086185	LOC106605230	GRAM domain-containing protein 1A-like%2C transcript variant X2
439	gene11847:106605230	156.378	0.66462	0.126398	5.25814	1.45519e-07	7.33411e-05	ssa05	54054017	54074336	LOC106605230	GRAM domain-containing protein 1A-like%2C transcript variant X6
440	gene11847:106605230	156.378	0.66462	0.126398	5.25814	1.45519e-07	7.33411e-05	ssa05	54054017	54086722	LOC106605230	GRAM domain-containing protein 1A-like%2C transcript variant X5
441	gene11847:106605230	156.378	0.66462	0.126398	5.25814	1.45519e-07	7.33411e-05	ssa05	54054017	54087497	LOC106605230	GRAM domain-containing protein 1A-like%2C transcript variant X1
442	gene11847:106605230	156.378	0.66462	0.126398	5.25814	1.45519e-07	7.33411e-05	ssa05	54054017	54087497	LOC106605230	GRAM domain-containing protein 1A-like%2C transcript variant X3
443	gene11847:106605230	156.378	0.66462	0.126398	5.25814	1.45519e-07	7.33411e-05	ssa05	54054017	54077258	LOC106605230	GRAM domain-containing protein 1A-like%2C transcript variant X4
444	gene11848:106605232	1531.89	-0.444441	0.114982	-3.86532	0.000110944	0.00413705	ssa05	54089707	54093159	LOC106605232	sodium channel subunit beta-1-like%2C transcript variant X3
445	gene11848:106605232	1531.89	-0.444441	0.114982	-3.86532	0.000110944	0.00413705	ssa05	54089805	54093159	LOC106605232	sodium channel subunit beta-1-like%2C transcript variant X1
446	gene11848:106605232	1531.89	-0.444441	0.114982	-3.86532	0.000110944	0.00413705	ssa05	54087570	54093159	LOC106605232	sodium channel subunit beta-1-like%2C transcript variant X2
447	gene1185:106606220	5290.95	-0.348919	0.0959647	-3.63591	0.000277001	0.00710532	ssa01	55378484	55392089	LOC106606220	myozenin-1-like%2C transcript variant X1
448	gene1185:106606220	5290.95	-0.348919	0.0959647	-3.63591	0.000277001	0.00710532	ssa01	55378484	55392083	LOC106606220	myozenin-1-like%2C transcript variant X2
449	gene11869:106605213	154.478	-0.401999	0.120626	-3.3326	0.000860388	0.0142546	ssa05	54335041	54341837	ankmy2	ankyrin repeat and MYND domain containing 2
450	gene11871:106605211	193.33	-0.516947	0.0985986	-5.24294	1.58035e-07	7.6916e-05	ssa05	54352070	54388653	ispd	isoprenoid synthase domain containing%2C transcript variant X2
451	gene11871:106605211	193.33	-0.516947	0.0985986	-5.24294	1.58035e-07	7.6916e-05	ssa05	54352069	54388653	ispd	isoprenoid synthase domain containing%2C transcript variant X1
452	gene11872:106605210	210.702	-0.507165	0.116524	-4.35245	1.34626e-05	0.00127728	ssa05	54411299	54421134	meox2	mesenchyme homeobox 2%2C transcript variant X2
453	gene11872:106605210	210.702	-0.507165	0.116524	-4.35245	1.34626e-05	0.00127728	ssa05	54411299	54421134	meox2	mesenchyme homeobox 2%2C transcript variant X1
454	gene11875:106605207	131.746	-0.405367	0.149678	-2.70826	0.00676379	0.048945	ssa05	54538343	54557098	etv1	ets variant 1%2C transcript variant X2
455	gene11875:106605207	131.746	-0.405367	0.149678	-2.70826	0.00676379	0.048945	ssa05	54538341	54557098	etv1	ets variant 1%2C transcript variant X1
456	gene11875:106605207	131.746	-0.405367	0.149678	-2.70826	0.00676379	0.048945	ssa05	54538341	54557098	etv1	ets variant 1%2C transcript variant X5
457	gene11875:106605207	131.746	-0.405367	0.149678	-2.70826	0.00676379	0.048945	ssa05	54538341	54557098	etv1	ets variant 1%2C transcript variant X3
458	gene11875:106605207	131.746	-0.405367	0.149678	-2.70826	0.00676379	0.048945	ssa05	54538341	54557098	etv1	ets variant 1%2C transcript variant X4
459	gene11891:106605259	223.288	-0.328413	0.0959879	-3.4214	0.000623006	0.0118097	ssa05	54863838	54888376	LOC106605259	glucocorticoid-induced transcript 1 protein-like%2C transcript variant X2
460	gene11891:106605259	223.288	-0.328413	0.0959879	-3.4214	0.000623006	0.0118097	ssa05	54863838	54888376	LOC106605259	glucocorticoid-induced transcript 1 protein-like%2C transcript variant X3
461	gene11891:106605259	223.288	-0.328413	0.0959879	-3.4214	0.000623006	0.0118097	ssa05	54863838	54888376	LOC106605259	glucocorticoid-induced transcript 1 protein-like%2C transcript variant X5
462	gene11891:106605259	223.288	-0.328413	0.0959879	-3.4214	0.000623006	0.0118097	ssa05	54863838	54888376	LOC106605259	glucocorticoid-induced transcript 1 protein-like%2C transcript variant X1
463	gene11896:106605263	31.9181	-0.494831	0.176021	-2.8112	0.0049357	0.0403987	ssa05	54921270	54923486	LOC106605263	protachykinin-like
464	gene11907:106605270	155.484	-0.528579	0.147924	-3.57332	0.000352482	0.00819455	ssa05	55207899	55259836	LOC106605270	DNA-binding protein SATB1-like%2C transcript variant X4
465	gene11907:106605270	155.484	-0.528579	0.147924	-3.57332	0.000352482	0.00819455	ssa05	55207904	55259836	LOC106605270	DNA-binding protein SATB1-like%2C transcript variant X3
466	gene11907:106605270	155.484	-0.528579	0.147924	-3.57332	0.000352482	0.00819455	ssa05	55207900	55261216	LOC106605270	DNA-binding protein SATB1-like%2C transcript variant X1
467	gene11907:106605270	155.484	-0.528579	0.147924	-3.57332	0.000352482	0.00819455	ssa05	55207900	55259836	LOC106605270	DNA-binding protein SATB1-like%2C transcript variant X6
468	gene11907:106605270	155.484	-0.528579	0.147924	-3.57332	0.000352482	0.00819455	ssa05	55207900	55259836	LOC106605270	DNA-binding protein SATB1-like%2C transcript variant X5
469	gene11907:106605270	155.484	-0.528579	0.147924	-3.57332	0.000352482	0.00819455	ssa05	55217634	55259836	LOC106605270	DNA-binding protein SATB1-like%2C transcript variant X2
470	gene11907:106605270	155.484	-0.528579	0.147924	-3.57332	0.000352482	0.00819455	ssa05	55207897	55261216	LOC106605270	DNA-binding protein SATB1-like%2C transcript variant X7
471	gene11907:106605270	155.484	-0.528579	0.147924	-3.57332	0.000352482	0.00819455	ssa05	55207903	55259836	LOC106605270	DNA-binding protein SATB1-like%2C transcript variant X8
472	gene11907:106605270	155.484	-0.528579	0.147924	-3.57332	0.000352482	0.00819455	ssa05	55207892	55261216	LOC106605270	DNA-binding protein SATB1-like%2C transcript variant X10
473	gene11907:106605270	155.484	-0.528579	0.147924	-3.57332	0.000352482	0.00819455	ssa05	55207897	55259836	LOC106605270	DNA-binding protein SATB1-like%2C transcript variant X9
474	gene1191:106606259	58.673	-0.633616	0.16352	-3.87484	0.000106693	0.00403903	ssa01	55483314	55487774	LOC106606259	T-cell leukemia homeobox protein 1-like%2C transcript variant X1
475	gene1191:106606259	58.673	-0.633616	0.16352	-3.87484	0.000106693	0.00403903	ssa01	55483314	55487772	LOC106606259	T-cell leukemia homeobox protein 1-like%2C transcript variant X2
476	gene11919:106605251	21.8363	0.654847	0.208878	3.13507	0.00171814	0.0212926	ssa05	55658249	55669657	LOC106605251	PHD finger protein 1-like
477	gene11931:100196009	400.63	-0.21142	0.0780437	-2.709	0.00674866	0.0488626	ssa05	56071910	56073629	bola1	bolA homolog 1 (E. coli)%2C transcript variant X1
478	gene11931:100196009	400.63	-0.21142	0.0780437	-2.709	0.00674866	0.0488626	ssa05	56072576	56073624	bola1	bolA homolog 1 (E. coli)
479	gene11944:106605307	782.769	-0.249616	0.0809256	-3.08451	0.00203887	0.0236853	ssa05	56363670	56365198	LOC106605307	ragulator complex protein LAMTOR2
480	gene11963:106605326	145.319	0.543745	0.157965	3.44218	0.000577051	0.0112565	ssa05	56799490	56817316	LOC106605326	semaphorin-7A-like
481	gene11964:106605327	197.78	-0.348569	0.122541	-2.84451	0.00444792	0.0379003	ssa05	56830427	56853242	LOC106605327	leucine-rich repeat and immunoglobulin-like domain-containing nogo receptor-interacting protein 1%2C transcript variant X1
482	gene11964:106605327	197.78	-0.348569	0.122541	-2.84451	0.00444792	0.0379003	ssa05	56830427	56841091	LOC106605327	leucine-rich repeat and immunoglobulin-like domain-containing nogo receptor-interacting protein 1%2C transcript variant X3
483	gene11966:106605328	640.171	0.221697	0.0794908	2.78897	0.00528766	0.0421555	ssa05	56872975	56879886	LOC106605328	cathepsin S-like
484	gene11973:106605332	65.4821	-0.482121	0.171945	-2.80393	0.00504836	0.0409684	ssa05	56993622	56995918	LOC106605332	lysM and putative peptidoglycan-binding domain-containing protein 1-like
485	gene11987:106605346	197.403	-0.266769	0.0937281	-2.8462	0.00442444	0.0377614	ssa05	57523661	57536839	LOC106605346	probable C-mannosyltransferase DPY19L1
486	gene11991:106605350	939.541	-0.208879	0.0683837	-3.05452	0.00225423	0.0252328	ssa05	57796974	57800531	LOC106605350	dynactin subunit 3-like
487	gene11996:106605352	269.408	-0.293975	0.087207	-3.371	0.000748955	0.0131349	ssa05	57977613	57999615	LOC106605352	BMP-binding endothelial regulator protein-like
488	gene1200:106606354	399.326	-0.263765	0.0948798	-2.77999	0.00543611	0.0428351	ssa01	55823499	55859482	LOC106606354	uncharacterized LOC106606354%2C transcript variant X1
489	gene1200:106606354	399.326	-0.263765	0.0948798	-2.77999	0.00543611	0.0428351	ssa01	55823498	55859482	LOC106606354	uncharacterized LOC106606354%2C transcript variant X2
490	gene12001:106605355	101.957	-0.382442	0.127184	-3.00699	0.00263845	0.027802	ssa05	58064406	58066425	LOC106605355	uncharacterized LOC106605355
491	gene12025:106605375	772.707	-0.225217	0.0700023	-3.21729	0.0012941	0.0180044	ssa05	58406977	58420297	tp53inp1	tumor protein p53 inducible nuclear protein 1%2C transcript variant X1
492	gene12025:106605375	772.707	-0.225217	0.0700023	-3.21729	0.0012941	0.0180044	ssa05	58406989	58420297	tp53inp1	tumor protein p53 inducible nuclear protein 1%2C transcript variant X2
493	gene12032:106605475	327.746	-0.178674	0.0647107	-2.76112	0.00576041	0.0443279	ssa05	58646560	58654601	LOC106605475	protein DEK-like%2C transcript variant X1
494	gene12032:106605475	327.746	-0.178674	0.0647107	-2.76112	0.00576041	0.0443279	ssa05	58646335	58654601	LOC106605475	protein DEK-like%2C transcript variant X4
495	gene12032:106605475	327.746	-0.178674	0.0647107	-2.76112	0.00576041	0.0443279	ssa05	58646018	58654601	LOC106605475	protein DEK-like%2C transcript variant X3
496	gene12032:106605475	327.746	-0.178674	0.0647107	-2.76112	0.00576041	0.0443279	ssa05	58646335	58654601	LOC106605475	protein DEK-like%2C transcript variant X5
497	gene12032:106605475	327.746	-0.178674	0.0647107	-2.76112	0.00576041	0.0443279	ssa05	58646555	58654601	LOC106605475	protein DEK-like%2C transcript variant X2
498	gene12038:106605467	1078.48	-0.254953	0.0660899	-3.85767	0.000114475	0.00419361	ssa05	58790236	58797191	decr1	2%2C4-dienoyl CoA reductase 1%2C mitochondrial
499	gene12042:106605464	122.774	0.239822	0.0847206	2.83074	0.00464398	0.0389607	ssa05	58836488	58899201	LOC106605464	rho guanine nucleotide exchange factor 2-like%2C transcript variant X2
500	gene12042:106605464	122.774	0.239822	0.0847206	2.83074	0.00464398	0.0389607	ssa05	58836488	58880037	LOC106605464	rho guanine nucleotide exchange factor 2-like%2C transcript variant X4
501	gene12042:106605464	122.774	0.239822	0.0847206	2.83074	0.00464398	0.0389607	ssa05	58836488	58873098	LOC106605464	rho guanine nucleotide exchange factor 2-like%2C transcript variant X3
502	gene12042:106605464	122.774	0.239822	0.0847206	2.83074	0.00464398	0.0389607	ssa05	58836488	58899201	LOC106605464	rho guanine nucleotide exchange factor 2-like%2C transcript variant X1
503	gene12062:106605450	191.848	-0.39621	0.143488	-2.76128	0.00575746	0.0443235	ssa05	59271254	59287491	LOC106605450	ras GTPase-activating-like protein IQGAP3%2C transcript variant X2
504	gene12062:106605450	191.848	-0.39621	0.143488	-2.76128	0.00575746	0.0443235	ssa05	59271254	59287491	LOC106605450	ras GTPase-activating-like protein IQGAP3%2C transcript variant X1
505	gene12065:100194515	383.854	-0.311324	0.0925254	-3.36474	0.000766169	0.0132876	ssa05	59375531	59385569	polr3gl	polymerase (RNA) III (DNA directed) polypeptide G like%2C transcript variant X1
506	gene12065:100194515	383.854	-0.311324	0.0925254	-3.36474	0.000766169	0.0132876	ssa05	59375161	59385569	polr3gl	polymerase (RNA) III (DNA directed) polypeptide G like%2C transcript variant X2
507	gene12065:100194515	383.854	-0.311324	0.0925254	-3.36474	0.000766169	0.0132876	ssa05	59375206	59384996	polr3gl	polymerase (RNA) III (DNA directed) polypeptide G like
508	gene1207:106606490	685.33	-0.43308	0.113712	-3.80858	0.000139769	0.00472316	ssa01	56310384	56353438	LOC106606490	heat shock 70 kDa protein 12A-like%2C transcript variant X3
509	gene1207:106606490	685.33	-0.43308	0.113712	-3.80858	0.000139769	0.00472316	ssa01	56310384	56353439	LOC106606490	heat shock 70 kDa protein 12A-like%2C transcript variant X2
510	gene1207:106606490	685.33	-0.43308	0.113712	-3.80858	0.000139769	0.00472316	ssa01	56310384	56353438	LOC106606490	heat shock 70 kDa protein 12A-like%2C transcript variant X1
511	gene1207:106606490	685.33	-0.43308	0.113712	-3.80858	0.000139769	0.00472316	ssa01	56310384	56335385	LOC106606490	heat shock 70 kDa protein 12A-like%2C transcript variant X4
512	gene12085:106605430	108.009	-0.482609	0.134464	-3.58914	0.000331773	0.00789932	ssa05	59691537	59697399	LOC106605430	hemojuvelin-like%2C transcript variant X2
513	gene12085:106605430	108.009	-0.482609	0.134464	-3.58914	0.000331773	0.00789932	ssa05	59688580	59697399	LOC106605430	hemojuvelin-like%2C transcript variant X1
514	gene12085:106605430	108.009	-0.482609	0.134464	-3.58914	0.000331773	0.00789932	ssa05	59688580	59697399	LOC106605430	hemojuvelin-like%2C transcript variant X3
515	gene1209:100136392	1101.07	-0.296532	0.0898222	-3.30133	0.00096228	0.0151332	ssa01	56533306	56587353	LOC100136392	V-type proton ATPase subunit B%2C brain isoform
516	gene12091:100380613	62.328	0.49854	0.160164	3.11268	0.00185397	0.0222406	ssa05	59986800	60002557	stea4	Metalloreductase STEAP4%2C transcript variant X1
517	gene12091:100380613	62.328	0.49854	0.160164	3.11268	0.00185397	0.0222406	ssa05	59986800	60002511	stea4	Metalloreductase STEAP4
518	gene12096:106605423	126.533	0.522216	0.165376	3.15775	0.00158991	0.0203452	ssa05	60086028	60110802	LOC106605423	NAC-alpha domain-containing protein 1-like
519	gene12111:106605411	289.842	-0.579641	0.148309	-3.90832	9.2939e-05	0.00373711	ssa05	60500066	60591331	LOC106605411	triple functional domain protein-like%2C transcript variant X1
520	gene12111:106605411	289.842	-0.579641	0.148309	-3.90832	9.2939e-05	0.00373711	ssa05	60502663	60591332	LOC106605411	triple functional domain protein-like%2C transcript variant X6
521	gene12111:106605411	289.842	-0.579641	0.148309	-3.90832	9.2939e-05	0.00373711	ssa05	60506681	60591333	LOC106605411	triple functional domain protein-like%2C transcript variant X7
522	gene12111:106605411	289.842	-0.579641	0.148309	-3.90832	9.2939e-05	0.00373711	ssa05	60500066	60574730	LOC106605411	triple functional domain protein-like%2C transcript variant X5
523	gene12111:106605411	289.842	-0.579641	0.148309	-3.90832	9.2939e-05	0.00373711	ssa05	60500066	60606271	LOC106605411	triple functional domain protein-like%2C transcript variant X4
524	gene12111:106605411	289.842	-0.579641	0.148309	-3.90832	9.2939e-05	0.00373711	ssa05	60515084	60591334	LOC106605411	triple functional domain protein-like%2C transcript variant X9
525	gene12111:106605411	289.842	-0.579641	0.148309	-3.90832	9.2939e-05	0.00373711	ssa05	60500066	60591330	LOC106605411	triple functional domain protein-like%2C transcript variant X2
526	gene12111:106605411	289.842	-0.579641	0.148309	-3.90832	9.2939e-05	0.00373711	ssa05	60515084	60591335	LOC106605411	triple functional domain protein-like%2C transcript variant X8
527	gene12111:106605411	289.842	-0.579641	0.148309	-3.90832	9.2939e-05	0.00373711	ssa05	60500066	60632791	LOC106605411	triple functional domain protein-like%2C transcript variant X3
528	gene12119:106605408	239.564	-0.320723	0.0895091	-3.58314	0.000339491	0.00802041	ssa05	60850928	60858321	LOC106605408	zinc-binding protein A33-like%2C transcript variant X3
529	gene12119:106605408	239.564	-0.320723	0.0895091	-3.58314	0.000339491	0.00802041	ssa05	60851059	60858321	LOC106605408	zinc-binding protein A33-like%2C transcript variant X1
530	gene12119:106605408	239.564	-0.320723	0.0895091	-3.58314	0.000339491	0.00802041	ssa05	60850928	60858321	LOC106605408	zinc-binding protein A33-like%2C transcript variant X2
531	gene12119:106605408	239.564	-0.320723	0.0895091	-3.58314	0.000339491	0.00802041	ssa05	60850928	60858321	LOC106605408	zinc-binding protein A33-like%2C transcript variant X4
532	gene12120:106605402	282.448	0.342895	0.1218	2.81523	0.00487424	0.0400849	ssa05	60858191	60878967	LOC106605402	uncharacterized LOC106605402%2C transcript variant X1
533	gene12120:106605402	282.448	0.342895	0.1218	2.81523	0.00487424	0.0400849	ssa05	60858191	60878682	LOC106605402	uncharacterized LOC106605402%2C transcript variant X2
534	gene12130:106605391	205.368	-0.783504	0.168846	-4.64034	3.47844e-06	0.000584565	ssa05	61136278	61240341	LOC106605391	regulating synaptic membrane exocytosis protein 2-like%2C transcript variant X11
535	gene12130:106605391	205.368	-0.783504	0.168846	-4.64034	3.47844e-06	0.000584565	ssa05	61165433	61240341	LOC106605391	regulating synaptic membrane exocytosis protein 2-like%2C transcript variant X26
536	gene12130:106605391	205.368	-0.783504	0.168846	-4.64034	3.47844e-06	0.000584565	ssa05	61136278	61240341	LOC106605391	regulating synaptic membrane exocytosis protein 2-like%2C transcript variant X22
537	gene12130:106605391	205.368	-0.783504	0.168846	-4.64034	3.47844e-06	0.000584565	ssa05	61136278	61240341	LOC106605391	regulating synaptic membrane exocytosis protein 2-like%2C transcript variant X13
538	gene12130:106605391	205.368	-0.783504	0.168846	-4.64034	3.47844e-06	0.000584565	ssa05	61136278	61240341	LOC106605391	regulating synaptic membrane exocytosis protein 2-like%2C transcript variant X8
539	gene12130:106605391	205.368	-0.783504	0.168846	-4.64034	3.47844e-06	0.000584565	ssa05	61136278	61240341	LOC106605391	regulating synaptic membrane exocytosis protein 2-like%2C transcript variant X10
540	gene12130:106605391	205.368	-0.783504	0.168846	-4.64034	3.47844e-06	0.000584565	ssa05	61231450	61240341	LOC106605391	regulating synaptic membrane exocytosis protein 2-like%2C transcript variant X29
541	gene12130:106605391	205.368	-0.783504	0.168846	-4.64034	3.47844e-06	0.000584565	ssa05	61136278	61240341	LOC106605391	regulating synaptic membrane exocytosis protein 2-like%2C transcript variant X2
542	gene12130:106605391	205.368	-0.783504	0.168846	-4.64034	3.47844e-06	0.000584565	ssa05	61136278	61240341	LOC106605391	regulating synaptic membrane exocytosis protein 2-like%2C transcript variant X18
543	gene12130:106605391	205.368	-0.783504	0.168846	-4.64034	3.47844e-06	0.000584565	ssa05	61136278	61240341	LOC106605391	regulating synaptic membrane exocytosis protein 2-like%2C transcript variant X20
544	gene12130:106605391	205.368	-0.783504	0.168846	-4.64034	3.47844e-06	0.000584565	ssa05	61136278	61240341	LOC106605391	regulating synaptic membrane exocytosis protein 2-like%2C transcript variant X14
545	gene12130:106605391	205.368	-0.783504	0.168846	-4.64034	3.47844e-06	0.000584565	ssa05	61136278	61240341	LOC106605391	regulating synaptic membrane exocytosis protein 2-like%2C transcript variant X5
546	gene12130:106605391	205.368	-0.783504	0.168846	-4.64034	3.47844e-06	0.000584565	ssa05	61136278	61240341	LOC106605391	regulating synaptic membrane exocytosis protein 2-like%2C transcript variant X23
547	gene12130:106605391	205.368	-0.783504	0.168846	-4.64034	3.47844e-06	0.000584565	ssa05	61136278	61240341	LOC106605391	regulating synaptic membrane exocytosis protein 2-like%2C transcript variant X1
548	gene12130:106605391	205.368	-0.783504	0.168846	-4.64034	3.47844e-06	0.000584565	ssa05	61136278	61240341	LOC106605391	regulating synaptic membrane exocytosis protein 2-like%2C transcript variant X9
549	gene12130:106605391	205.368	-0.783504	0.168846	-4.64034	3.47844e-06	0.000584565	ssa05	61136278	61240341	LOC106605391	regulating synaptic membrane exocytosis protein 2-like%2C transcript variant X19
550	gene12130:106605391	205.368	-0.783504	0.168846	-4.64034	3.47844e-06	0.000584565	ssa05	61136278	61240341	LOC106605391	regulating synaptic membrane exocytosis protein 2-like%2C transcript variant X15
551	gene12130:106605391	205.368	-0.783504	0.168846	-4.64034	3.47844e-06	0.000584565	ssa05	61136278	61240341	LOC106605391	regulating synaptic membrane exocytosis protein 2-like%2C transcript variant X4
552	gene12130:106605391	205.368	-0.783504	0.168846	-4.64034	3.47844e-06	0.000584565	ssa05	61231450	61240341	LOC106605391	regulating synaptic membrane exocytosis protein 2-like%2C transcript variant X30
553	gene12130:106605391	205.368	-0.783504	0.168846	-4.64034	3.47844e-06	0.000584565	ssa05	61136278	61240341	LOC106605391	regulating synaptic membrane exocytosis protein 2-like%2C transcript variant X3
554	gene12130:106605391	205.368	-0.783504	0.168846	-4.64034	3.47844e-06	0.000584565	ssa05	61136278	61240341	LOC106605391	regulating synaptic membrane exocytosis protein 2-like%2C transcript variant X21
555	gene12130:106605391	205.368	-0.783504	0.168846	-4.64034	3.47844e-06	0.000584565	ssa05	61184724	61240341	LOC106605391	regulating synaptic membrane exocytosis protein 2-like%2C transcript variant X27
556	gene12130:106605391	205.368	-0.783504	0.168846	-4.64034	3.47844e-06	0.000584565	ssa05	61136278	61240341	LOC106605391	regulating synaptic membrane exocytosis protein 2-like%2C transcript variant X6
557	gene12130:106605391	205.368	-0.783504	0.168846	-4.64034	3.47844e-06	0.000584565	ssa05	61136278	61240341	LOC106605391	regulating synaptic membrane exocytosis protein 2-like%2C transcript variant X7
558	gene12130:106605391	205.368	-0.783504	0.168846	-4.64034	3.47844e-06	0.000584565	ssa05	61205663	61240341	LOC106605391	regulating synaptic membrane exocytosis protein 2-like%2C transcript variant X28
559	gene12130:106605391	205.368	-0.783504	0.168846	-4.64034	3.47844e-06	0.000584565	ssa05	61136278	61240341	LOC106605391	regulating synaptic membrane exocytosis protein 2-like%2C transcript variant X17
560	gene12130:106605391	205.368	-0.783504	0.168846	-4.64034	3.47844e-06	0.000584565	ssa05	61136278	61240341	LOC106605391	regulating synaptic membrane exocytosis protein 2-like%2C transcript variant X24
561	gene12130:106605391	205.368	-0.783504	0.168846	-4.64034	3.47844e-06	0.000584565	ssa05	61136278	61240341	LOC106605391	regulating synaptic membrane exocytosis protein 2-like%2C transcript variant X16
562	gene12130:106605391	205.368	-0.783504	0.168846	-4.64034	3.47844e-06	0.000584565	ssa05	61136278	61240341	LOC106605391	regulating synaptic membrane exocytosis protein 2-like%2C transcript variant X12
563	gene12130:106605391	205.368	-0.783504	0.168846	-4.64034	3.47844e-06	0.000584565	ssa05	61136278	61240341	LOC106605391	regulating synaptic membrane exocytosis protein 2-like%2C transcript variant X25
564	gene12135:106605482	34.1731	-0.874285	0.183095	-4.77503	1.79678e-06	0.000372739	ssa05	61531671	61537042	LOC106605482	zinc finger protein ZFPM2-like
565	gene12136:106605484	78.3233	-0.334248	0.114735	-2.91322	0.00357717	0.0333273	ssa05	61580820	61591508	LOC106605484	cytochrome b5 reductase 4-like%2C transcript variant X1
566	gene12136:106605484	78.3233	-0.334248	0.114735	-2.91322	0.00357717	0.0333273	ssa05	61580820	61591508	LOC106605484	cytochrome b5 reductase 4-like%2C transcript variant X3
567	gene12141:106605488	130.176	-0.421963	0.144297	-2.92427	0.0034527	0.0326781	ssa05	61734172	61755634	LOC106605488	trafficking kinesin-binding protein 1-like%2C transcript variant X2
568	gene12141:106605488	130.176	-0.421963	0.144297	-2.92427	0.0034527	0.0326781	ssa05	61721978	61755634	LOC106605488	trafficking kinesin-binding protein 1-like%2C transcript variant X1
569	gene12146:106605499	37.2866	-0.689723	0.15163	-4.54872	5.3973e-06	0.000727587	ssa05	62162354	62193486	LOC106605499	single-minded homolog 1-A-like%2C transcript variant X1
570	gene12146:106605499	37.2866	-0.689723	0.15163	-4.54872	5.3973e-06	0.000727587	ssa05	62162355	62193486	LOC106605499	single-minded homolog 1-A-like%2C transcript variant X2
571	gene12146:106605499	37.2866	-0.689723	0.15163	-4.54872	5.3973e-06	0.000727587	ssa05	62162355	62193486	LOC106605499	single-minded homolog 1-A-like%2C transcript variant X4
572	gene12146:106605499	37.2866	-0.689723	0.15163	-4.54872	5.3973e-06	0.000727587	ssa05	62162354	62193486	LOC106605499	single-minded homolog 1-A-like%2C transcript variant X3
573	gene12170:106605518	340.44	-0.214177	0.06917	-3.09638	0.00195896	0.0230282	ssa05	63571269	63610167	LOC106605518	phosphatidylinositide phosphatase SAC1-A-like
574	gene12203:106605548	36.7631	0.539224	0.180629	2.98525	0.00283346	0.028935	ssa05	64359824	64384728	LOC106605548	oxidation resistance protein 1-like
575	gene12205:100195464	12.1339	-0.854012	0.287914	-2.9662	0.003015	0.0300426	ssa05	64432365	64435875	cxcr3	C-X-C chemokine receptor type 3
576	gene12207:106605553	12.1821	-0.863105	0.313667	-2.75166	0.00592944	0.0451701	ssa05	64468989	64472496	LOC106605553	C-X-C chemokine receptor type 3-like
577	gene12232:106605650	227.617	-0.383319	0.100402	-3.81786	0.000134614	0.00462825	ssa05	65472671	65482668	LOC106605650	blood vessel epicardial substance-like%2C transcript variant X3
578	gene12232:106605650	227.617	-0.383319	0.100402	-3.81786	0.000134614	0.00462825	ssa05	65472671	65482668	LOC106605650	blood vessel epicardial substance-like%2C transcript variant X1
579	gene12232:106605650	227.617	-0.383319	0.100402	-3.81786	0.000134614	0.00462825	ssa05	65472671	65482668	LOC106605650	blood vessel epicardial substance-like%2C transcript variant X2
580	gene12257:106605633	570.619	-0.268227	0.0929413	-2.88598	0.00390198	0.0351516	ssa05	65984906	65989824	LOC106605633	transmembrane protein 147
581	gene12259:106605632	261.001	-0.626365	0.199985	-3.13206	0.00173587	0.0213898	ssa05	66011559	66022264	LOC106605632	potassium-transporting ATPase alpha chain 1-like
582	gene12270:106605627	1720.37	-0.371384	0.092857	-3.99952	6.34702e-05	0.00297326	ssa05	66265404	66282014	LOC106605627	FXYD domain-containing ion transport regulator 6-like%2C transcript variant X7
583	gene12270:106605627	1720.37	-0.371384	0.092857	-3.99952	6.34702e-05	0.00297326	ssa05	66265404	66272256	LOC106605627	FXYD domain-containing ion transport regulator 6-like%2C transcript variant X1
584	gene12270:106605627	1720.37	-0.371384	0.092857	-3.99952	6.34702e-05	0.00297326	ssa05	66265404	66272253	LOC106605627	FXYD domain-containing ion transport regulator 6-like%2C transcript variant X3
585	gene12270:106605627	1720.37	-0.371384	0.092857	-3.99952	6.34702e-05	0.00297326	ssa05	66265404	66272256	LOC106605627	FXYD domain-containing ion transport regulator 6-like%2C transcript variant X2
586	gene12270:106605627	1720.37	-0.371384	0.092857	-3.99952	6.34702e-05	0.00297326	ssa05	66265404	66282015	LOC106605627	FXYD domain-containing ion transport regulator 6-like%2C transcript variant X6
587	gene12270:106605627	1720.37	-0.371384	0.092857	-3.99952	6.34702e-05	0.00297326	ssa05	66265404	66282016	LOC106605627	FXYD domain-containing ion transport regulator 6-like%2C transcript variant X5
588	gene12270:106605627	1720.37	-0.371384	0.092857	-3.99952	6.34702e-05	0.00297326	ssa05	66265404	66282016	LOC106605627	FXYD domain-containing ion transport regulator 6-like%2C transcript variant X4
589	gene12278:106605622	129.162	-0.379799	0.100278	-3.78745	0.000152203	0.00493116	ssa05	66543949	66598798	LOC106605622	kin of IRRE-like protein 3%2C transcript variant X9
590	gene12278:106605622	129.162	-0.379799	0.100278	-3.78745	0.000152203	0.00493116	ssa05	66543950	66598798	LOC106605622	kin of IRRE-like protein 3%2C transcript variant X12
591	gene12278:106605622	129.162	-0.379799	0.100278	-3.78745	0.000152203	0.00493116	ssa05	66543948	66598798	LOC106605622	kin of IRRE-like protein 3%2C transcript variant X11
592	gene12278:106605622	129.162	-0.379799	0.100278	-3.78745	0.000152203	0.00493116	ssa05	66543949	66598798	LOC106605622	kin of IRRE-like protein 3%2C transcript variant X6
593	gene12278:106605622	129.162	-0.379799	0.100278	-3.78745	0.000152203	0.00493116	ssa05	66543951	66598798	LOC106605622	kin of IRRE-like protein 3%2C transcript variant X8
594	gene12278:106605622	129.162	-0.379799	0.100278	-3.78745	0.000152203	0.00493116	ssa05	66543949	66598798	LOC106605622	kin of IRRE-like protein 3%2C transcript variant X5
595	gene12278:106605622	129.162	-0.379799	0.100278	-3.78745	0.000152203	0.00493116	ssa05	66543950	66598798	LOC106605622	kin of IRRE-like protein 3%2C transcript variant X4
596	gene12278:106605622	129.162	-0.379799	0.100278	-3.78745	0.000152203	0.00493116	ssa05	66543950	66598798	LOC106605622	kin of IRRE-like protein 3%2C transcript variant X14
597	gene12278:106605622	129.162	-0.379799	0.100278	-3.78745	0.000152203	0.00493116	ssa05	66543948	66598798	LOC106605622	kin of IRRE-like protein 3%2C transcript variant X1
598	gene12278:106605622	129.162	-0.379799	0.100278	-3.78745	0.000152203	0.00493116	ssa05	66543950	66598798	LOC106605622	kin of IRRE-like protein 3%2C transcript variant X15
599	gene12278:106605622	129.162	-0.379799	0.100278	-3.78745	0.000152203	0.00493116	ssa05	66543957	66597067	LOC106605622	kin of IRRE-like protein 3%2C transcript variant X18
600	gene12278:106605622	129.162	-0.379799	0.100278	-3.78745	0.000152203	0.00493116	ssa05	66543951	66598798	LOC106605622	kin of IRRE-like protein 3%2C transcript variant X17
601	gene12278:106605622	129.162	-0.379799	0.100278	-3.78745	0.000152203	0.00493116	ssa05	66543951	66598798	LOC106605622	kin of IRRE-like protein 3%2C transcript variant X3
602	gene12278:106605622	129.162	-0.379799	0.100278	-3.78745	0.000152203	0.00493116	ssa05	66543950	66598798	LOC106605622	kin of IRRE-like protein 3%2C transcript variant X13
603	gene12278:106605622	129.162	-0.379799	0.100278	-3.78745	0.000152203	0.00493116	ssa05	66543951	66598798	LOC106605622	kin of IRRE-like protein 3%2C transcript variant X16
604	gene12278:106605622	129.162	-0.379799	0.100278	-3.78745	0.000152203	0.00493116	ssa05	66543953	66598798	LOC106605622	kin of IRRE-like protein 3%2C transcript variant X10
605	gene12278:106605622	129.162	-0.379799	0.100278	-3.78745	0.000152203	0.00493116	ssa05	66543952	66598798	LOC106605622	kin of IRRE-like protein 3%2C transcript variant X7
606	gene12278:106605622	129.162	-0.379799	0.100278	-3.78745	0.000152203	0.00493116	ssa05	66543949	66598798	LOC106605622	kin of IRRE-like protein 3%2C transcript variant X2
607	gene12279:106605621	224.667	0.438781	0.128909	3.40381	0.000664537	0.0123304	ssa05	66604967	66643480	LOC106605621	suppressor of tumorigenicity 14 protein homolog%2C transcript variant X1
608	gene12279:106605621	224.667	0.438781	0.128909	3.40381	0.000664537	0.0123304	ssa05	66604967	66623270	LOC106605621	suppressor of tumorigenicity 14 protein homolog%2C transcript variant X2
609	gene12283:106605616	8.5468	1.10544	0.289378	3.82005	0.000133425	0.00460331	ssa05	66733656	66744865	LOC106605616	zinc finger and BTB domain-containing protein 32-like%2C transcript variant X2
610	gene12283:106605616	8.5468	1.10544	0.289378	3.82005	0.000133425	0.00460331	ssa05	66733676	66744865	LOC106605616	zinc finger and BTB domain-containing protein 32-like%2C transcript variant X1
611	gene12287:106605614	2349.2	-0.593338	0.138113	-4.29602	1.73894e-05	0.00151107	ssa05	66827137	66828869	LOC106605614	gamma-secretase subunit PEN-2-like
612	gene12288:100194524	395.042	-0.407025	0.105523	-3.85721	0.000114689	0.00419735	ssa05	66829877	66833015	hspb6l	small heat shock protein-like%2C transcript variant X1
613	gene12288:100194524	395.042	-0.407025	0.105523	-3.85721	0.000114689	0.00419735	ssa05	66830670	66833015	hspb6l	small heat shock protein-like%2C transcript variant X2
614	gene12288:100194524	395.042	-0.407025	0.105523	-3.85721	0.000114689	0.00419735	ssa05	66830848	66833013	hspb6l	small heat shock protein-like
615	gene12293:100196655	3499.87	-0.441393	0.137831	-3.20241	0.00136283	0.0185346	ssa05	66858120	66863389	hsp70-3	heat shock protein 70
616	gene12337:100196333	22614.2	-0.289664	0.101158	-2.86348	0.00419019	0.0366425	ssa05	67849628	67851730	apoc1	Apolipoprotein C-I%2C transcript variant X1
617	gene12337:100196333	22614.2	-0.289664	0.101158	-2.86348	0.00419019	0.0366425	ssa05	67849636	67851614	apoc1	Apolipoprotein C-I
618	gene12356:106605699	107.289	0.416936	0.128296	3.24981	0.00115483	0.016899	ssa05	68138254	68182251	LOC106605699	transmembrane protein 145-like
619	gene12368:106605715	243.956	0.2184	0.0631117	3.46053	0.000539116	0.0107754	ssa05	68543032	68546254	LOC106605715	gastrula zinc finger protein XlCGF57.1-like%2C transcript variant X5
620	gene12368:106605715	243.956	0.2184	0.0631117	3.46053	0.000539116	0.0107754	ssa05	68543032	68546838	LOC106605715	gastrula zinc finger protein XlCGF57.1-like%2C transcript variant X4
621	gene12368:106605715	243.956	0.2184	0.0631117	3.46053	0.000539116	0.0107754	ssa05	68543032	68547506	LOC106605715	gastrula zinc finger protein XlCGF57.1-like%2C transcript variant X6
622	gene12380:106605730	5.60014	1.08232	0.353327	3.06323	0.00218964	0.0247763	ssa05	68746794	68756941	LOC106605730	complement C1s subcomponent-like
623	gene12395:106605747	54.4684	-0.580585	0.157901	-3.67688	0.0002361	0.00648212	ssa05	68958780	68961187	LOC106605747	mpv17-like protein%2C transcript variant X1
624	gene12395:106605747	54.4684	-0.580585	0.157901	-3.67688	0.0002361	0.00648212	ssa05	68958780	68961187	LOC106605747	mpv17-like protein%2C transcript variant X3
625	gene12395:106605747	54.4684	-0.580585	0.157901	-3.67688	0.0002361	0.00648212	ssa05	68958780	68961187	LOC106605747	mpv17-like protein%2C transcript variant X2
626	gene12395:106605747	54.4684	-0.580585	0.157901	-3.67688	0.0002361	0.00648212	ssa05	68959054	68961187	LOC106605747	mpv17-like protein%2C transcript variant X4
627	gene12397:106605743	12.2251	0.761239	0.241984	3.14582	0.0016562	0.0208351	ssa05	68971839	68988575	LOC106605743	sphingosine kinase 2-like
628	gene12402:106605753	592.729	-0.35234	0.116789	-3.0169	0.00255372	0.0272837	ssa05	69049978	69053000	tfpt	TCF3 (E2A) fusion partner (in childhood Leukemia)
629	gene12403:106605754	101.813	0.577621	0.13653	4.23072	2.32946e-05	0.00173242	ssa05	69053104	69064257	cnot3	CCR4-NOT transcription complex%2C subunit 3
630	gene12423:106605774	130.533	0.430149	0.158366	2.71618	0.00660407	0.0482445	ssa05	69313749	69317580	dbp	D site of albumin promoter (albumin D-box) binding protein%2C transcript variant X1
631	gene12423:106605774	130.533	0.430149	0.158366	2.71618	0.00660407	0.0482445	ssa05	69313747	69317580	dbp	D site of albumin promoter (albumin D-box) binding protein%2C transcript variant X3
632	gene12423:106605774	130.533	0.430149	0.158366	2.71618	0.00660407	0.0482445	ssa05	69313748	69317580	dbp	D site of albumin promoter (albumin D-box) binding protein%2C transcript variant X2
633	gene12424:106605773	603.631	0.227917	0.0788886	2.88909	0.00386355	0.0349482	ssa05	69321326	69330692	LOC106605773	hepatic leukemia factor-like%2C transcript variant X1
634	gene12424:106605773	603.631	0.227917	0.0788886	2.88909	0.00386355	0.0349482	ssa05	69321331	69330692	LOC106605773	hepatic leukemia factor-like%2C transcript variant X3
635	gene12424:106605773	603.631	0.227917	0.0788886	2.88909	0.00386355	0.0349482	ssa05	69321325	69330692	LOC106605773	hepatic leukemia factor-like%2C transcript variant X2
636	gene12471:106605818	16.6746	0.607702	0.223996	2.71301	0.00666754	0.0485472	ssa05	70397940	70419930	LOC106605818	epsin-1-like
637	gene12472:106605825	12.7364	0.712161	0.239467	2.97395	0.00293994	0.0296176	ssa05	70420018	70422277	LOC106605825	forkhead box protein J3-like
638	gene12473:106605824	39.5996	0.466392	0.164095	2.8422	0.00448031	0.038052	ssa05	70422373	70424271	LOC106605824	forkhead box protein J2-like
639	gene12483:106605843	3102.24	-0.276094	0.094584	-2.91903	0.00351118	0.0330616	ssa05	70529129	70532073	LOC106605843	cytochrome c oxidase subunit 6B1-like
640	gene12486:106605839	47.2599	0.477541	0.142465	3.35198	0.000802344	0.0136925	ssa05	70605708	70644392	LOC106605839	ephrin type-B receptor 5-like%2C transcript variant X2
641	gene12486:106605839	47.2599	0.477541	0.142465	3.35198	0.000802344	0.0136925	ssa05	70605709	70644391	LOC106605839	ephrin type-B receptor 5-like%2C transcript variant X1
642	gene12505:106605855	21.9563	0.948759	0.244149	3.88599	0.000101915	0.00396305	ssa05	70921938	70925135	LOC106605855	beta-enolase-like
643	gene12538:106605880	190.296	0.512487	0.15301	3.34936	0.000809973	0.0137749	ssa05	71663512	71675538	ash1l	ash1 (absent%2C small%2C or homeotic)-like (Drosophila)
644	gene12544:106605881	31.2391	0.664105	0.196259	3.38382	0.000714838	0.0127459	ssa05	71738786	71761919	fam189b	family with sequence similarity 189%2C member B
645	gene12553:106605901	311.223	0.346103	0.101856	3.39796	0.000678895	0.012423	ssa05	72053711	72078844	adar	adenosine deaminase%2C RNA-specific
646	gene12586:106605942	237.631	0.220491	0.0686363	3.21245	0.00131606	0.0181593	ssa05	73148496	73154554	LOC106605942	uncharacterized LOC106605942%2C transcript variant X1
647	gene12587:106605943	86.4379	-0.345692	0.127446	-2.71246	0.00667856	0.0485709	ssa05	73156033	73159040	LOC106605943	RNA-binding protein 12B-like
648	gene12601:106605949	107.251	0.381983	0.117822	3.24203	0.00118681	0.0171792	ssa05	73338282	73381207	LOC106605949	tyrosine-protein phosphatase non-receptor type 3-like
649	gene12646:100380836	233.78	-0.656085	0.15463	-4.24294	2.20607e-05	0.001681	ssa05	74188931	74194895	gtpba	GTP-binding protein 10%2C transcript variant X1
650	gene12646:100380836	233.78	-0.656085	0.15463	-4.24294	2.20607e-05	0.001681	ssa05	74190616	74194425	gtpba	GTP-binding protein 10
651	gene12646:100380836	233.78	-0.656085	0.15463	-4.24294	2.20607e-05	0.001681	ssa05	74188931	74193793	gtpba	GTP-binding protein 10%2C transcript variant X2
652	gene1266:106607182	37.0798	-0.442849	0.136565	-3.24277	0.00118374	0.0171445	ssa01	60564573	60925000	LOC106607182	protocadherin-15-like
653	gene12669:106606016	22.8631	0.65409	0.187911	3.48084	0.00049984	0.0102754	ssa05	74714078	74727597	epb41l4b	erythrocyte membrane protein band 4.1 like 4B%2C transcript variant X3
654	gene12669:106606016	22.8631	0.65409	0.187911	3.48084	0.00049984	0.0102754	ssa05	74714078	74727597	epb41l4b	erythrocyte membrane protein band 4.1 like 4B%2C transcript variant X1
655	gene12669:106606016	22.8631	0.65409	0.187911	3.48084	0.00049984	0.0102754	ssa05	74714078	74727597	epb41l4b	erythrocyte membrane protein band 4.1 like 4B%2C transcript variant X2
656	gene12689:100196517	287.746	-0.624121	0.159587	-3.91085	9.19726e-05	0.00371419	ssa05	75602531	75604292	jtb	JTB protein
657	gene12692:106606040	68.4146	0.539143	0.187458	2.87608	0.00402644	0.035774	ssa05	75760960	75779751	LOC106606040	histone-lysine N-methyltransferase SETD2-like
658	gene12720:106606066	11.6281	-0.690467	0.246861	-2.79699	0.00515813	0.0415083	ssa05	76274018	76295515	LOC106606066	E3 ubiquitin-protein ligase TRIM71-like
659	gene12724:100195144	332.764	-0.545367	0.147147	-3.70629	0.000210322	0.00608839	ssa05	76395885	76402940	sbp1	Selenium-binding protein 1%2C transcript variant X1
660	gene12724:100195144	332.764	-0.545367	0.147147	-3.70629	0.000210322	0.00608839	ssa05	76395969	76402940	sbp1	Selenium-binding protein 1
661	gene12733:106606079	45.7798	0.687321	0.226883	3.0294	0.0024504	0.0265721	ssa05	76614924	76629925	LOC106606079	protein 4.1-like
662	gene12739:106606081	53.8675	0.526179	0.18897	2.78446	0.00536173	0.0425191	ssa05	76755873	76778784	LOC106606081	tenascin-R-like
663	gene12742:106606088	279.459	0.695944	0.239318	2.90802	0.00363721	0.0336358	ssa05	76857237	76869551	LOC106606088	trichohyalin-like%2C transcript variant X12
664	gene12742:106606088	279.459	0.695944	0.239318	2.90802	0.00363721	0.0336358	ssa05	76857237	76869550	LOC106606088	trichohyalin-like%2C transcript variant X8
665	gene12742:106606088	279.459	0.695944	0.239318	2.90802	0.00363721	0.0336358	ssa05	76857237	76869551	LOC106606088	trichohyalin-like%2C transcript variant X17
666	gene12742:106606088	279.459	0.695944	0.239318	2.90802	0.00363721	0.0336358	ssa05	76857237	76869551	LOC106606088	trichohyalin-like%2C transcript variant X9
667	gene12742:106606088	279.459	0.695944	0.239318	2.90802	0.00363721	0.0336358	ssa05	76857237	76869550	LOC106606088	trichohyalin-like%2C transcript variant X13
668	gene12742:106606088	279.459	0.695944	0.239318	2.90802	0.00363721	0.0336358	ssa05	76854048	76869550	LOC106606088	trichohyalin-like%2C transcript variant X2
669	gene12742:106606088	279.459	0.695944	0.239318	2.90802	0.00363721	0.0336358	ssa05	76854048	76869550	LOC106606088	trichohyalin-like%2C transcript variant X5
670	gene12742:106606088	279.459	0.695944	0.239318	2.90802	0.00363721	0.0336358	ssa05	76857237	76869550	LOC106606088	trichohyalin-like%2C transcript variant X14
671	gene12742:106606088	279.459	0.695944	0.239318	2.90802	0.00363721	0.0336358	ssa05	76857237	76869550	LOC106606088	trichohyalin-like%2C transcript variant X10
672	gene12742:106606088	279.459	0.695944	0.239318	2.90802	0.00363721	0.0336358	ssa05	76857237	76869551	LOC106606088	trichohyalin-like%2C transcript variant X16
673	gene12742:106606088	279.459	0.695944	0.239318	2.90802	0.00363721	0.0336358	ssa05	76857237	76869550	LOC106606088	trichohyalin-like%2C transcript variant X15
674	gene12742:106606088	279.459	0.695944	0.239318	2.90802	0.00363721	0.0336358	ssa05	76857237	76869550	LOC106606088	trichohyalin-like%2C transcript variant X7
675	gene12742:106606088	279.459	0.695944	0.239318	2.90802	0.00363721	0.0336358	ssa05	76857237	76869550	LOC106606088	trichohyalin-like%2C transcript variant X3
676	gene12742:106606088	279.459	0.695944	0.239318	2.90802	0.00363721	0.0336358	ssa05	76857237	76869550	LOC106606088	trichohyalin-like%2C transcript variant X11
677	gene12742:106606088	279.459	0.695944	0.239318	2.90802	0.00363721	0.0336358	ssa05	76857237	76869550	LOC106606088	trichohyalin-like%2C transcript variant X6
678	gene12742:106606088	279.459	0.695944	0.239318	2.90802	0.00363721	0.0336358	ssa05	76857237	76869550	LOC106606088	trichohyalin-like%2C transcript variant X4
679	gene12742:106606088	279.459	0.695944	0.239318	2.90802	0.00363721	0.0336358	ssa05	76857237	76869550	LOC106606088	trichohyalin-like%2C transcript variant X1
680	gene12758:106606105	5.91632	1.07613	0.34556	3.11416	0.00184468	0.0222001	ssa05	77238973	77246888	LOC106606105	transmembrane protein 245-like
681	gene12798:106606144	144.435	0.542294	0.134527	4.03111	5.55141e-05	0.00274465	ssa05	78505269	78549971	LOC106606144	dolichyl-diphosphooligosaccharide--protein glycosyltransferase subunit STT3B
682	gene1280:106607287	281.909	-0.273158	0.075005	-3.64187	0.000270669	0.00701655	ssa01	62068718	62081082	LOC106607287	survival of motor neuron-related-splicing factor 30-like%2C transcript variant X2
683	gene1280:106607287	281.909	-0.273158	0.075005	-3.64187	0.000270669	0.00701655	ssa01	62068718	62081593	LOC106607287	survival of motor neuron-related-splicing factor 30-like%2C transcript variant X1
684	gene1282:106607298	415.09	-0.182635	0.0664998	-2.74641	0.00602522	0.0455638	ssa01	62124542	62130821	LOC106607298	serine/threonine-protein phosphatase 2A 55 kDa regulatory subunit B delta isoform-like
685	gene1283:106607303	404.589	-0.427606	0.106998	-3.99639	6.43147e-05	0.00300023	ssa01	62157308	62229164	LOC106607303	transcription factor COE3-like%2C transcript variant X1
686	gene1283:106607303	404.589	-0.427606	0.106998	-3.99639	6.43147e-05	0.00300023	ssa01	62157310	62229163	LOC106607303	transcription factor COE3-like%2C transcript variant X9
687	gene1283:106607303	404.589	-0.427606	0.106998	-3.99639	6.43147e-05	0.00300023	ssa01	62157304	62229165	LOC106607303	transcription factor COE3-like%2C transcript variant X4
688	gene1283:106607303	404.589	-0.427606	0.106998	-3.99639	6.43147e-05	0.00300023	ssa01	62157306	62229165	LOC106607303	transcription factor COE3-like%2C transcript variant X6
689	gene1283:106607303	404.589	-0.427606	0.106998	-3.99639	6.43147e-05	0.00300023	ssa01	62157305	62229165	LOC106607303	transcription factor COE3-like%2C transcript variant X7
690	gene1283:106607303	404.589	-0.427606	0.106998	-3.99639	6.43147e-05	0.00300023	ssa01	62157309	62229163	LOC106607303	transcription factor COE3-like%2C transcript variant X8
691	gene1283:106607303	404.589	-0.427606	0.106998	-3.99639	6.43147e-05	0.00300023	ssa01	62157309	62229163	LOC106607303	transcription factor COE3-like%2C transcript variant X5
692	gene1283:106607303	404.589	-0.427606	0.106998	-3.99639	6.43147e-05	0.00300023	ssa01	62157306	62229165	LOC106607303	transcription factor COE3-like%2C transcript variant X19
693	gene1283:106607303	404.589	-0.427606	0.106998	-3.99639	6.43147e-05	0.00300023	ssa01	62157305	62229165	LOC106607303	transcription factor COE3-like%2C transcript variant X18
694	gene1283:106607303	404.589	-0.427606	0.106998	-3.99639	6.43147e-05	0.00300023	ssa01	62157308	62229164	LOC106607303	transcription factor COE3-like%2C transcript variant X10
695	gene1283:106607303	404.589	-0.427606	0.106998	-3.99639	6.43147e-05	0.00300023	ssa01	62157309	62229163	LOC106607303	transcription factor COE3-like%2C transcript variant X11
696	gene1283:106607303	404.589	-0.427606	0.106998	-3.99639	6.43147e-05	0.00300023	ssa01	62157308	62229164	LOC106607303	transcription factor COE3-like%2C transcript variant X12
697	gene1283:106607303	404.589	-0.427606	0.106998	-3.99639	6.43147e-05	0.00300023	ssa01	62157309	62229163	LOC106607303	transcription factor COE3-like%2C transcript variant X2
698	gene1283:106607303	404.589	-0.427606	0.106998	-3.99639	6.43147e-05	0.00300023	ssa01	62157309	62229163	LOC106607303	transcription factor COE3-like%2C transcript variant X15
699	gene1283:106607303	404.589	-0.427606	0.106998	-3.99639	6.43147e-05	0.00300023	ssa01	62157306	62229165	LOC106607303	transcription factor COE3-like%2C transcript variant X17
700	gene1283:106607303	404.589	-0.427606	0.106998	-3.99639	6.43147e-05	0.00300023	ssa01	62157307	62229164	LOC106607303	transcription factor COE3-like%2C transcript variant X3
701	gene1283:106607303	404.589	-0.427606	0.106998	-3.99639	6.43147e-05	0.00300023	ssa01	62157309	62229163	LOC106607303	transcription factor COE3-like%2C transcript variant X16
702	gene1283:106607303	404.589	-0.427606	0.106998	-3.99639	6.43147e-05	0.00300023	ssa01	62157310	62229163	LOC106607303	transcription factor COE3-like%2C transcript variant X14
703	gene1283:106607303	404.589	-0.427606	0.106998	-3.99639	6.43147e-05	0.00300023	ssa01	62157310	62229163	LOC106607303	transcription factor COE3-like%2C transcript variant X13
704	gene12831:106606175	9.31248	1.01356	0.300571	3.37211	0.000745939	0.0131179	ssa05	80221311	80253708	LOC106606175	metastasis suppressor protein 1-like
705	gene12845:106606188	897.668	0.411673	0.140456	2.93097	0.00337907	0.0321814	ssa06	190622	219754	ppl	periplakin
706	gene12884:106606229	28.3335	0.624563	0.166675	3.74719	0.000178828	0.00547978	ssa06	1275838	1288592	LOC106606229	monocarboxylate transporter 6-like%2C transcript variant X3
707	gene12884:106606229	28.3335	0.624563	0.166675	3.74719	0.000178828	0.00547978	ssa06	1274955	1288592	LOC106606229	monocarboxylate transporter 6-like%2C transcript variant X2
708	gene12884:106606229	28.3335	0.624563	0.166675	3.74719	0.000178828	0.00547978	ssa06	1275201	1288592	LOC106606229	monocarboxylate transporter 6-like%2C transcript variant X4
709	gene12884:106606229	28.3335	0.624563	0.166675	3.74719	0.000178828	0.00547978	ssa06	1275548	1288592	LOC106606229	monocarboxylate transporter 6-like%2C transcript variant X1
710	gene12884:106606229	28.3335	0.624563	0.166675	3.74719	0.000178828	0.00547978	ssa06	1276203	1288592	LOC106606229	monocarboxylate transporter 6-like%2C transcript variant X5
711	gene12908:106606254	38.3992	0.52418	0.186155	2.81582	0.00486523	0.0400548	ssa06	2005921	2011060	LOC106606254	phosphatidylinositol N-acetylglucosaminyltransferase subunit Q-like
712	gene12913:106606261	45.7984	-0.722314	0.174748	-4.13346	3.57347e-05	0.00219564	ssa06	2055153	2059387	LOC106606261	ketosamine-3-kinase-like
713	gene12917:106606265	25.9807	0.68619	0.219899	3.12048	0.00180555	0.0219193	ssa06	2240166	2244384	LOC106606265	zinc finger protein 750-like
714	gene12922:106606270	498.831	0.209139	0.0669062	3.12585	0.00177293	0.0216758	ssa06	2468439	2479122	LOC106606270	UPF0472 protein C16orf72 homolog
715	gene12935:106606286	41.5602	0.481753	0.177662	2.71162	0.00669549	0.0486219	ssa06	3118924	3182088	LOC106606286	brain-specific angiogenesis inhibitor 1-associated protein 2-like%2C transcript variant X4
716	gene12935:106606286	41.5602	0.481753	0.177662	2.71162	0.00669549	0.0486219	ssa06	3118924	3175577	LOC106606286	brain-specific angiogenesis inhibitor 1-associated protein 2-like%2C transcript variant X3
717	gene12935:106606286	41.5602	0.481753	0.177662	2.71162	0.00669549	0.0486219	ssa06	3118924	3176461	LOC106606286	brain-specific angiogenesis inhibitor 1-associated protein 2-like%2C transcript variant X1
718	gene12935:106606286	41.5602	0.481753	0.177662	2.71162	0.00669549	0.0486219	ssa06	3118924	3182088	LOC106606286	brain-specific angiogenesis inhibitor 1-associated protein 2-like%2C transcript variant X2
719	gene12956:106606306	174.468	0.203731	0.074671	2.72838	0.00636455	0.0471286	ssa06	3932478	3949433	LOC106606306	nuclear distribution protein nudE-like 1-B
720	gene12978:106606327	3078.53	-0.298322	0.102962	-2.8974	0.00376269	0.0343677	ssa06	4468200	4481303	LOC106606327	peripheral myelin protein 22-like
721	gene12990:106606337	289.544	0.491144	0.109882	4.46975	7.83126e-06	0.000918649	ssa06	5025935	5066262	LOC106606337	neuronal-specific septin-3-like
722	gene13003:106606342	56.7191	0.379003	0.135447	2.79816	0.00513945	0.0414385	ssa06	5383695	5400160	LOC106606342	elongation factor Tu%2C mitochondrial-like
723	gene13036:106606388	44.5096	0.651331	0.21785	2.98982	0.00279142	0.0287078	ssa06	7028914	7034838	LOC106606388	inward rectifier potassium channel 2-like%2C transcript variant X1
724	gene13043:106606393	20.9662	0.560916	0.184567	3.0391	0.00237287	0.0260947	ssa06	7146713	7154121	LOC106606393	tripartite motif-containing protein 16-like
725	gene13056:106606404	125.096	-0.594737	0.167718	-3.54606	0.000391035	0.00873848	ssa06	7686693	7691625	LOC106606404	RNA-binding protein with serine-rich domain 1-like
726	gene13063:100194918	211.043	-0.390951	0.137064	-2.85233	0.00434004	0.0372959	ssa06	8133099	8134350	hpbp1	Hsp70-binding protein 1
727	gene13065:106606414	23.3406	0.585777	0.212727	2.75366	0.00589328	0.0449967	ssa06	8142603	8149299	LOC106606414	putative L-aspartate dehydrogenase
728	gene13069:106606416	100.514	-0.469368	0.144868	-3.23998	0.00119538	0.0172566	ssa06	8277424	8297597	LOC106606416	cyclin-F-like
729	gene13086:106606435	123.52	-0.34093	0.106402	-3.20417	0.00135455	0.0184741	ssa06	9018888	9023456	LOC106606435	myeloid-associated differentiation marker-like protein 2
730	gene13088:106606447	55.2234	-0.650794	0.182338	-3.56915	0.000358139	0.00828495	ssa06	9170423	9171976	LOC106606447	centromere protein X-like
731	gene13096:106606431	2852.73	-0.236921	0.0864114	-2.74178	0.00611077	0.0459209	ssa06	9378782	9397834	LOC106606431	metalloproteinase inhibitor 2-like
732	gene13117:106606462	166.659	-0.192275	0.0700875	-2.74336	0.00608138	0.045801	ssa06	10570586	10595427	LOC106606462	platelet-derived growth factor subunit A-like%2C transcript variant X4
733	gene13117:106606462	166.659	-0.192275	0.0700875	-2.74336	0.00608138	0.045801	ssa06	10562052	10595420	LOC106606462	platelet-derived growth factor subunit A-like%2C transcript variant X3
734	gene13118:106606461	35.1921	0.807037	0.142526	5.6624	1.49274e-08	1.24315e-05	ssa06	10629610	10713035	LOC106606461	cAMP-dependent protein kinase type I-beta regulatory subunit-like
735	gene13151:106606495	91.082	0.382261	0.0867212	4.40794	1.0436e-05	0.00109748	ssa06	11841785	11901735	LOC106606495	vasorin-like%2C transcript variant X4
736	gene13151:106606495	91.082	0.382261	0.0867212	4.40794	1.0436e-05	0.00109748	ssa06	11841785	11901735	LOC106606495	vasorin-like%2C transcript variant X2
737	gene13151:106606495	91.082	0.382261	0.0867212	4.40794	1.0436e-05	0.00109748	ssa06	11841786	11901735	LOC106606495	vasorin-like%2C transcript variant X1
738	gene13151:106606495	91.082	0.382261	0.0867212	4.40794	1.0436e-05	0.00109748	ssa06	11841785	11901735	LOC106606495	vasorin-like%2C transcript variant X3
739	gene13155:106606498	146.776	0.278043	0.101105	2.75004	0.00595875	0.045287	ssa06	12092283	12105778	LOC106606498	dnaJ homolog subfamily A member 3%2C mitochondrial-like%2C transcript variant X2
740	gene13155:106606498	146.776	0.278043	0.101105	2.75004	0.00595875	0.045287	ssa06	12092276	12105778	LOC106606498	dnaJ homolog subfamily A member 3%2C mitochondrial-like%2C transcript variant X1
741	gene13155:106606498	146.776	0.278043	0.101105	2.75004	0.00595875	0.045287	ssa06	12092276	12105778	LOC106606498	dnaJ homolog subfamily A member 3%2C mitochondrial-like%2C transcript variant X3
742	gene13157:106606500	493.887	-0.197521	0.0652274	-3.0282	0.00246017	0.0266187	ssa06	12106006	12116517	LOC106606500	heme oxygenase 2-like%2C transcript variant X2
743	gene13157:106606500	493.887	-0.197521	0.0652274	-3.0282	0.00246017	0.0266187	ssa06	12106006	12116517	LOC106606500	heme oxygenase 2-like%2C transcript variant X3
744	gene13157:106606500	493.887	-0.197521	0.0652274	-3.0282	0.00246017	0.0266187	ssa06	12106006	12116517	LOC106606500	heme oxygenase 2-like%2C transcript variant X1
745	gene13160:106606507	54.1113	1.201	0.25993	4.62049	3.82836e-06	0.000606527	ssa06	12165589	12167115	LOC106606507	transmembrane protein 100-like
746	gene13168:106606516	19.9717	0.795259	0.234539	3.39073	0.000697076	0.0125776	ssa06	12334760	12340994	LOC106606516	glycerophosphodiester phosphodiesterase 1-like
747	gene13179:106606529	69.5687	-0.417746	0.1404	-2.9754	0.00292602	0.029545	ssa06	12708289	12717320	LOC106606529	far upstream element-binding protein 2-like%2C transcript variant X1
748	gene13179:106606529	69.5687	-0.417746	0.1404	-2.9754	0.00292602	0.029545	ssa06	12706911	12717320	LOC106606529	far upstream element-binding protein 2-like%2C transcript variant X3
749	gene13179:106606529	69.5687	-0.417746	0.1404	-2.9754	0.00292602	0.029545	ssa06	12708289	12717320	LOC106606529	far upstream element-binding protein 2-like%2C transcript variant X2
750	gene1320:106607666	329.474	-0.415477	0.13534	-3.06988	0.00214146	0.0244709	ssa01	65036742	65052524	LOC106607666	alpha-actinin-2-like
751	gene13218:106606581	583.813	-0.410579	0.123684	-3.31958	0.000901524	0.0145942	ssa06	14474731	14480404	LOC106606581	MIF4G domain-containing protein B-like%2C transcript variant X2
752	gene13218:106606581	583.813	-0.410579	0.123684	-3.31958	0.000901524	0.0145942	ssa06	14474732	14480404	LOC106606581	MIF4G domain-containing protein B-like%2C transcript variant X1
753	gene13234:106606588	255.91	-0.39264	0.108439	-3.62083	0.000293665	0.00728351	ssa06	14980600	14985270	LOC106606588	serine/threonine-protein kinase LMTK2-like
754	gene13254:106606615	15.3526	-1.88881	0.33392	-5.65646	1.54523e-08	1.25889e-05	ssa06	15519204	15528406	LOC106606615	60S ribosomal protein L3-like
755	gene13270:100137056	86.4349	0.309298	0.109362	2.82819	0.00468114	0.0391498	ssa06	16213357	16215955	hn1	hematological and neurological expressed 1
756	gene13271:106606624	275.308	-0.367834	0.121227	-3.03427	0.00241122	0.0263603	ssa06	16216703	16222197	LOC106606624	small ubiquitin-related modifier 2
757	gene13287:106606635	34.2657	-0.491697	0.166317	-2.95639	0.00311265	0.0305242	ssa06	16597058	16601800	LOC106606635	uncharacterized LOC106606635
758	gene13291:106606640	1074.17	-0.610289	0.144836	-4.21366	2.51261e-05	0.00182614	ssa06	16660827	16668091	LOC106606640	60S ribosomal protein L3-like
759	gene13309:106606660	8.83293	0.80899	0.288217	2.80688	0.00500239	0.0407036	ssa06	17100300	17107474	LOC106606660	brain-specific angiogenesis inhibitor 1-associated protein 2-like protein 1
760	gene13311:100137051	183653	-0.607098	0.171222	-3.54567	0.00039161	0.00874612	ssa06	17124232	17126827	LOC100137051	parvalbumin beta-like
761	gene1332:106607716	8.3131	1.20892	0.361206	3.34691	0.000817165	0.0138383	ssa01	65849938	65897286	LOC106607716	protein FAM13C-like
762	gene1333:100380323	897.089	0.466213	0.143443	3.25015	0.00115342	0.016885	ssa01	65914026	65924466	mot9	Monocarboxylate transporter 9%2C transcript variant X3
763	gene1333:100380323	897.089	0.466213	0.143443	3.25015	0.00115342	0.016885	ssa01	65914034	65922929	mot9	Monocarboxylate transporter 9
764	gene1333:100380323	897.089	0.466213	0.143443	3.25015	0.00115342	0.016885	ssa01	65914026	65924055	mot9	Monocarboxylate transporter 9%2C transcript variant X1
765	gene1333:100380323	897.089	0.466213	0.143443	3.25015	0.00115342	0.016885	ssa01	65914026	65924368	mot9	Monocarboxylate transporter 9%2C transcript variant X2
766	gene13348:106606697	147.072	-0.330065	0.109401	-3.01701	0.00255284	0.0272837	ssa06	18203429	18212675	LOC106606697	cytosolic Fe-S cluster assembly factor narfl-like%2C transcript variant X2
767	gene13348:106606697	147.072	-0.330065	0.109401	-3.01701	0.00255284	0.0272837	ssa06	18203429	18212675	LOC106606697	cytosolic Fe-S cluster assembly factor narfl-like%2C transcript variant X1
768	gene1335:100380754	465.042	-0.296911	0.0852756	-3.48179	0.000498078	0.0102448	ssa01	65937530	65961110	LOC100380754	coiled-coil domain-containing protein 6
769	gene13353:106606701	1789.71	-0.302718	0.0904716	-3.346	0.000819864	0.0138714	ssa06	18308755	18312961	LOC106606701	methionine-R-sulfoxide reductase B1-A-like
770	gene13374:106606725	50.6492	0.400983	0.140229	2.85949	0.00424328	0.0368531	ssa06	19187281	19194158	LOC106606725	ankyrin repeat domain-containing protein 40-like
771	gene13380:106606733	57.0027	-0.513334	0.157704	-3.25504	0.00113375	0.0166948	ssa06	19272047	19282906	LOC106606733	decapping and exoribonuclease protein-like%2C transcript variant X2
772	gene13380:106606733	57.0027	-0.513334	0.157704	-3.25504	0.00113375	0.0166948	ssa06	19272047	19278567	LOC106606733	decapping and exoribonuclease protein-like%2C transcript variant X3
773	gene13380:106606733	57.0027	-0.513334	0.157704	-3.25504	0.00113375	0.0166948	ssa06	19272047	19282919	LOC106606733	decapping and exoribonuclease protein-like%2C transcript variant X1
774	gene13384:106606729	111.769	-0.466773	0.129678	-3.59948	0.000318853	0.00768294	ssa06	19307174	19310984	LOC106606729	kelch-like protein 24
775	gene1339:106607841	59.9033	0.384857	0.138482	2.77911	0.00545073	0.0429121	ssa01	66380721	66385505	LOC106607841	protein ZNF365-like%2C transcript variant X2
776	gene1339:106607841	59.9033	0.384857	0.138482	2.77911	0.00545073	0.0429121	ssa01	66380568	66385505	LOC106607841	protein ZNF365-like%2C transcript variant X3
777	gene1339:106607841	59.9033	0.384857	0.138482	2.77911	0.00545073	0.0429121	ssa01	66380590	66385505	LOC106607841	protein ZNF365-like%2C transcript variant X1
778	gene1339:106607841	59.9033	0.384857	0.138482	2.77911	0.00545073	0.0429121	ssa01	66380591	66385505	LOC106607841	protein ZNF365-like%2C transcript variant X4
779	gene13398:106606751	492.985	-0.406117	0.125373	-3.23927	0.00119835	0.0172794	ssa06	19823994	19828701	LOC106606751	promethin-like%2C transcript variant X2
780	gene13398:106606751	492.985	-0.406117	0.125373	-3.23927	0.00119835	0.0172794	ssa06	19823994	19828794	LOC106606751	promethin-like%2C transcript variant X1
781	gene13398:106606751	492.985	-0.406117	0.125373	-3.23927	0.00119835	0.0172794	ssa06	19823994	19828702	LOC106606751	promethin-like%2C transcript variant X3
782	gene1341:106607870	8.39408	-0.775662	0.282755	-2.74323	0.00608379	0.0458099	ssa01	66402550	66410366	LOC106607870	early growth response protein 2b-like%2C transcript variant X2
783	gene1341:106607870	8.39408	-0.775662	0.282755	-2.74323	0.00608379	0.0458099	ssa01	66402550	66405024	LOC106607870	early growth response protein 2b-like%2C transcript variant X3
784	gene1341:106607870	8.39408	-0.775662	0.282755	-2.74323	0.00608379	0.0458099	ssa01	66402550	66418088	LOC106607870	early growth response protein 2b-like%2C transcript variant X1
785	gene13410:106606788	10.8385	2.33923	0.648598	3.6066	0.000310235	0.00754209	ssa06	20287819	20291852	LOC106606788	pancreatic secretory granule membrane major glycoprotein GP2-like%2C transcript variant X2
786	gene13410:106606788	10.8385	2.33923	0.648598	3.6066	0.000310235	0.00754209	ssa06	20287819	20292004	LOC106606788	pancreatic secretory granule membrane major glycoprotein GP2-like%2C transcript variant X1
787	gene13411:106606768	16.0038	1.08008	0.30915	3.49371	0.000476351	0.00994223	ssa06	20334373	20451088	LOC106606768	voltage-dependent P/Q-type calcium channel subunit alpha-1A-like
788	gene13439:106606759	230.459	-0.349986	0.109575	-3.19403	0.00140302	0.0188666	ssa06	21314479	21328058	LOC106606759	pyridoxal-dependent decarboxylase domain-containing protein 1-like
789	gene1344:106607910	81.8354	-0.438415	0.127398	-3.44129	0.000578939	0.0112825	ssa01	66476582	66479563	LOC106607910	cytochrome P450 26A1-like
790	gene13440:100195130	300.196	0.270332	0.0962822	2.80771	0.00498957	0.040641	ssa06	21329780	21344974	erf3b	Eukaryotic peptide chain release factor GTP-binding subunit ERF3B
791	gene13442:106606773	138.682	-0.361776	0.128988	-2.80473	0.00503588	0.0408937	ssa06	21360873	21365299	LOC106606773	zinc-binding protein A33-like
792	gene13446:106606804	13.9804	1.19854	0.310255	3.86307	0.000111971	0.00415319	ssa06	21684847	21738518	LOC106606804	voltage-dependent P/Q-type calcium channel subunit alpha-1A-like
793	gene13450:106606806	312.373	0.26325	0.0899603	2.92629	0.00343037	0.0325542	ssa06	21803973	21816218	gtf2f1	general transcription factor IIF%2C polypeptide 1%2C 74kDa%2C transcript variant X4
794	gene13450:106606806	312.373	0.26325	0.0899603	2.92629	0.00343037	0.0325542	ssa06	21803973	21816219	gtf2f1	general transcription factor IIF%2C polypeptide 1%2C 74kDa%2C transcript variant X5
795	gene13450:106606806	312.373	0.26325	0.0899603	2.92629	0.00343037	0.0325542	ssa06	21803973	21818539	gtf2f1	general transcription factor IIF%2C polypeptide 1%2C 74kDa%2C transcript variant X3
796	gene13450:106606806	312.373	0.26325	0.0899603	2.92629	0.00343037	0.0325542	ssa06	21803973	21816219	gtf2f1	general transcription factor IIF%2C polypeptide 1%2C 74kDa%2C transcript variant X6
797	gene13450:106606806	312.373	0.26325	0.0899603	2.92629	0.00343037	0.0325542	ssa06	21803973	21816215	gtf2f1	general transcription factor IIF%2C polypeptide 1%2C 74kDa%2C transcript variant X1
798	gene13450:106606806	312.373	0.26325	0.0899603	2.92629	0.00343037	0.0325542	ssa06	21803973	21818565	gtf2f1	general transcription factor IIF%2C polypeptide 1%2C 74kDa%2C transcript variant X2
799	gene13453:106606808	64.8094	0.472555	0.139384	3.39031	0.000698136	0.0125906	ssa06	22042874	22088267	sgsm3	small G protein signaling modulator 3%2C transcript variant X5
800	gene13453:106606808	64.8094	0.472555	0.139384	3.39031	0.000698136	0.0125906	ssa06	22045552	22088267	sgsm3	small G protein signaling modulator 3%2C transcript variant X3
801	gene13453:106606808	64.8094	0.472555	0.139384	3.39031	0.000698136	0.0125906	ssa06	22045552	22088267	sgsm3	small G protein signaling modulator 3%2C transcript variant X4
802	gene13453:106606808	64.8094	0.472555	0.139384	3.39031	0.000698136	0.0125906	ssa06	22045552	22088267	sgsm3	small G protein signaling modulator 3%2C transcript variant X2
803	gene13453:106606808	64.8094	0.472555	0.139384	3.39031	0.000698136	0.0125906	ssa06	22045552	22088267	sgsm3	small G protein signaling modulator 3%2C transcript variant X1
804	gene1346:106607892	133.235	-0.406703	0.124886	-3.2566	0.00112755	0.0166362	ssa01	66481017	66486883	LOC106607892	cytochrome P450 26B1-like%2C transcript variant X2
805	gene1346:106607892	133.235	-0.406703	0.124886	-3.2566	0.00112755	0.0166362	ssa01	66481017	66486882	LOC106607892	cytochrome P450 26B1-like%2C transcript variant X1
806	gene1346:106607892	133.235	-0.406703	0.124886	-3.2566	0.00112755	0.0166362	ssa01	66481017	66486882	LOC106607892	cytochrome P450 26B1-like%2C transcript variant X3
807	gene13462:106606818	66.6148	0.366289	0.12665	2.89213	0.00382635	0.0347435	ssa06	22331855	22340445	LOC106606818	nucleolar transcription factor 1-like
808	gene13472:106606832	9.13117	0.989612	0.309659	3.19582	0.00139436	0.0188088	ssa06	22839332	22845218	LOC106606832	uncharacterized LOC106606832
809	gene1349:106607927	516.874	-0.315778	0.113401	-2.78462	0.00535912	0.0425145	ssa01	66627433	66631119	LOC106607927	protein phosphatase 1 regulatory subunit 3C-B-like
810	gene135:106605022	121.52	0.452517	0.150782	3.00112	0.00268984	0.0281243	ssa01	5231837	5277716	LOC106605022	SH3 domain-containing YSC84-like protein 1%2C transcript variant X2
811	gene135:106605022	121.52	0.452517	0.150782	3.00112	0.00268984	0.0281243	ssa01	5231840	5277716	LOC106605022	SH3 domain-containing YSC84-like protein 1%2C transcript variant X1
812	gene1357:106607945	337.548	-0.291299	0.105357	-2.76487	0.00569454	0.0440744	ssa01	68107909	68461685	LOC106607945	attractin-like protein 1%2C transcript variant X1
813	gene1359:106607969	357.419	-0.316332	0.0820972	-3.85314	0.000116611	0.00424497	ssa01	68589828	68609740	LOC106607969	cilia- and flagella-associated protein 36-like%2C transcript variant X2
814	gene1359:106607969	357.419	-0.316332	0.0820972	-3.85314	0.000116611	0.00424497	ssa01	68589826	68609740	LOC106607969	cilia- and flagella-associated protein 36-like%2C transcript variant X1
815	gene13623:100196766	178.909	-0.29259	0.0904561	-3.2346	0.00121812	0.0174504	ssa06	24334597	24338512	tmub2	transmembrane and ubiquitin-like domain containing 2
816	gene13625:106606865	47.9985	0.471229	0.147392	3.19711	0.00138813	0.0187621	ssa06	24354028	24368004	ubtf	upstream binding transcription factor%2C RNA polymerase I%2C transcript variant X1
817	gene13625:106606865	47.9985	0.471229	0.147392	3.19711	0.00138813	0.0187621	ssa06	24354028	24368004	ubtf	upstream binding transcription factor%2C RNA polymerase I%2C transcript variant X2
818	gene1363:100194654	27393.7	-0.351331	0.0934042	-3.7614	0.000168963	0.00528113	ssa01	68777053	68779433	LOC100194654	ribosomal protein S27-3
819	gene13639:106606880	98.2959	0.361897	0.130705	2.7688	0.00562636	0.0437371	ssa06	24539154	24549269	LOC106606880	TBC1 domain family member 17-like%2C transcript variant X1
820	gene13639:106606880	98.2959	0.361897	0.130705	2.7688	0.00562636	0.0437371	ssa06	24539154	24549269	LOC106606880	TBC1 domain family member 17-like%2C transcript variant X2
821	gene1365:100137053	9390.04	-0.248203	0.0841406	-2.94986	0.00317921	0.0309567	ssa01	68865441	68881125	rtn10	reticulon 10%2C transcript variant X5
822	gene1365:100137053	9390.04	-0.248203	0.0841406	-2.94986	0.00317921	0.0309567	ssa01	68848725	68881127	rtn10	reticulon 10%2C transcript variant X1
823	gene1365:100137053	9390.04	-0.248203	0.0841406	-2.94986	0.00317921	0.0309567	ssa01	68848727	68881127	rtn10	reticulon 10%2C transcript variant X2
824	gene1365:100137053	9390.04	-0.248203	0.0841406	-2.94986	0.00317921	0.0309567	ssa01	68848733	68881125	rtn10	reticulon 10%2C transcript variant X4
825	gene1365:100137053	9390.04	-0.248203	0.0841406	-2.94986	0.00317921	0.0309567	ssa01	68867611	68881125	rtn10	reticulon 10%2C transcript variant X6
826	gene1365:100137053	9390.04	-0.248203	0.0841406	-2.94986	0.00317921	0.0309567	ssa01	68848733	68881125	rtn10	reticulon 10%2C transcript variant X3
827	gene13653:106606889	900.453	-0.380402	0.132366	-2.87385	0.004055	0.0359341	ssa06	24756500	24758272	LOC106606889	cytochrome c oxidase subunit 6A%2C mitochondrial
828	gene13665:106606900	130688	-0.393655	0.0924555	-4.25778	2.06465e-05	0.00164058	ssa06	24880606	24885367	LOC106606900	myosin regulatory light chain 2%2C skeletal muscle isoform type 2-like
829	gene13697:106606935	65.9819	-0.47932	0.159702	-3.00134	0.00268791	0.0281139	ssa06	25791292	25798081	LOC106606935	transcription factor 20-like%2C transcript variant X2
830	gene13697:106606935	65.9819	-0.47932	0.159702	-3.00134	0.00268791	0.0281139	ssa06	25791176	25798081	LOC106606935	transcription factor 20-like%2C transcript variant X1
831	gene13699:106606936	102.759	-0.352955	0.130326	-2.70825	0.00676396	0.048945	ssa06	25838731	25850968	LOC106606936	ras-associating and dilute domain-containing protein-like%2C transcript variant X1
832	gene13699:106606936	102.759	-0.352955	0.130326	-2.70825	0.00676396	0.048945	ssa06	25838731	25850970	LOC106606936	ras-associating and dilute domain-containing protein-like%2C transcript variant X2
833	gene13705:106606938	16.8009	1.0301	0.282917	3.64102	0.000271563	0.00701868	ssa06	25921426	25926444	LOC106606938	glycine receptor subunit beta-like%2C transcript variant X3
834	gene13705:106606938	16.8009	1.0301	0.282917	3.64102	0.000271563	0.00701868	ssa06	25920243	25926444	LOC106606938	glycine receptor subunit beta-like%2C transcript variant X2
835	gene13705:106606938	16.8009	1.0301	0.282917	3.64102	0.000271563	0.00701868	ssa06	25921369	25926444	LOC106606938	glycine receptor subunit beta-like%2C transcript variant X1
836	gene13720:106606951	65.2628	0.727352	0.126009	5.77222	7.82326e-09	7.51755e-06	ssa06	26521683	26555588	LOC106606951	forkhead box protein K2-like
837	gene13724:100196109	280.916	-0.333431	0.11898	-2.8024	0.00507232	0.0410906	ssa06	26661442	26667547	ppct	Phosphatidylcholine transfer protein
838	gene13729:100380310	204.853	-0.407733	0.113848	-3.58139	0.000341776	0.00805053	ssa06	26894699	26899101	mfs11	UNC93-like protein MFSD11
839	gene13730:106606958	204.598	-0.340744	0.118197	-2.88286	0.00394082	0.0353699	ssa06	27252834	27259389	LOC106606958	chromobox protein homolog 2-like
840	gene1378:106608814	168.604	-0.565096	0.131666	-4.29189	1.77159e-05	0.00152275	ssa01	69613901	69617956	LOC106608814	VIP peptides-like
841	gene13786:106607064	1108.46	0.289578	0.0777689	3.72358	0.000196421	0.00580983	ssa06	29316805	29322336	LOC106607064	probable ATP-dependent RNA helicase DDX5%2C transcript variant X1
842	gene13786:106607064	1108.46	0.289578	0.0777689	3.72358	0.000196421	0.00580983	ssa06	29316805	29322336	LOC106607064	probable ATP-dependent RNA helicase DDX5%2C transcript variant X2
843	gene13797:106607055	47.0489	-0.705729	0.177697	-3.97153	7.14119e-05	0.00319299	ssa06	29662964	29666118	LOC106607055	DNA replication licensing factor mcm5-like
844	gene13815:106607040	67.1158	-0.473531	0.155701	-3.04128	0.00235577	0.025989	ssa06	29893208	29909302	LOC106607040	microtubule-associated serine/threonine-protein kinase 1-like
845	gene13837:106607023	360.582	-0.243966	0.0806743	-3.02409	0.00249385	0.0268794	ssa06	30292809	30324678	LOC106607023	mucin-17-like%2C transcript variant X1
846	gene13837:106607023	360.582	-0.243966	0.0806743	-3.02409	0.00249385	0.0268794	ssa06	30292809	30324678	LOC106607023	mucin-17-like%2C transcript variant X2
847	gene13863:106607104	1168.18	0.489862	0.137175	3.57107	0.000355532	0.00824692	ssa06	31233350	31244616	LOC106607104	CD9 antigen-like
848	gene13865:106607103	4196.78	0.583928	0.145497	4.01333	5.98676e-05	0.00287641	ssa06	31261887	31268148	LOC106607103	epithelial membrane protein 2-like%2C transcript variant X2
849	gene13865:106607103	4196.78	0.583928	0.145497	4.01333	5.98676e-05	0.00287641	ssa06	31262099	31268148	LOC106607103	epithelial membrane protein 2-like%2C transcript variant X1
850	gene13871:106607100	1055.62	-0.297849	0.0692155	-4.30321	1.68343e-05	0.00148793	ssa06	31624807	31630327	LOC106607100	RNA binding protein fox-1 homolog 2-like%2C transcript variant X2
851	gene13871:106607100	1055.62	-0.297849	0.0692155	-4.30321	1.68343e-05	0.00148793	ssa06	31624814	31630327	LOC106607100	RNA binding protein fox-1 homolog 2-like%2C transcript variant X1
852	gene13880:100192339	298.064	-0.521455	0.160861	-3.24165	0.0011884	0.0171823	ssa06	31779746	31781518	bglap	bone gamma-carboxyglutamate (gla) protein
853	gene13882:106607110	498.778	-0.28762	0.0908506	-3.16586	0.00154627	0.0200097	ssa06	31799339	31800259	smdt1	single-pass membrane protein with aspartate-rich tail 1
854	gene13890:106607221	317.3	-0.223683	0.0709156	-3.15422	0.0016093	0.0204789	ssa06	31868816	31879773	LOC106607221	glucosidase 2 subunit beta-like%2C transcript variant X1
855	gene13890:106607221	317.3	-0.223683	0.0709156	-3.15422	0.0016093	0.0204789	ssa06	31868816	31879657	LOC106607221	glucosidase 2 subunit beta-like%2C transcript variant X2
856	gene13891:106607220	21.5441	0.864516	0.216889	3.98598	6.72018e-05	0.00308256	ssa06	31883614	31945623	LOC106607220	cAMP-specific 3'%2C5'-cyclic phosphodiesterase 4C-like%2C transcript variant X1
857	gene13891:106607220	21.5441	0.864516	0.216889	3.98598	6.72018e-05	0.00308256	ssa06	31883614	31913237	LOC106607220	cAMP-specific 3'%2C5'-cyclic phosphodiesterase 4C-like%2C transcript variant X2
858	gene13891:106607220	21.5441	0.864516	0.216889	3.98598	6.72018e-05	0.00308256	ssa06	31883614	31901861	LOC106607220	cAMP-specific 3'%2C5'-cyclic phosphodiesterase 4C-like%2C transcript variant X3
859	gene13899:106607212	133.767	0.39439	0.120262	3.27943	0.00104016	0.0158848	ssa06	32066916	32098972	LOC106607212	sphingosine 1-phosphate receptor 2-like%2C transcript variant X6
860	gene13899:106607212	133.767	0.39439	0.120262	3.27943	0.00104016	0.0158848	ssa06	32066916	32098972	LOC106607212	sphingosine 1-phosphate receptor 2-like%2C transcript variant X4
861	gene13899:106607212	133.767	0.39439	0.120262	3.27943	0.00104016	0.0158848	ssa06	32066916	32098972	LOC106607212	sphingosine 1-phosphate receptor 2-like%2C transcript variant X1
862	gene13899:106607212	133.767	0.39439	0.120262	3.27943	0.00104016	0.0158848	ssa06	32092977	32098972	LOC106607212	sphingosine 1-phosphate receptor 2-like%2C transcript variant X5
863	gene13899:106607212	133.767	0.39439	0.120262	3.27943	0.00104016	0.0158848	ssa06	32066916	32098972	LOC106607212	sphingosine 1-phosphate receptor 2-like%2C transcript variant X3
864	gene13899:106607212	133.767	0.39439	0.120262	3.27943	0.00104016	0.0158848	ssa06	32066916	32098972	LOC106607212	sphingosine 1-phosphate receptor 2-like%2C transcript variant X2
865	gene13931:106607180	409.739	-0.363477	0.09305	-3.90625	9.37388e-05	0.00376522	ssa06	32860002	32938919	LOC106607180	serine/threonine-protein kinase WNK4-like
866	gene13946:100136424	1096.97	-0.240516	0.0875953	-2.74576	0.00603712	0.0456249	ssa06	33562734	33566663	rbx1	ring-box 1
867	gene13951:106607161	119.322	0.294204	0.104436	2.81709	0.00484614	0.0399767	ssa06	33653521	33659211	LOC106607161	protein Tob2-like
868	gene1396:106608394	121.455	0.348775	0.127338	2.73897	0.00616318	0.0461758	ssa01	70626766	70647734	LOC106608394	zinc finger MIZ domain-containing protein 1-like%2C transcript variant X7
869	gene1396:106608394	121.455	0.348775	0.127338	2.73897	0.00616318	0.0461758	ssa01	70626766	70814318	LOC106608394	zinc finger MIZ domain-containing protein 1-like%2C transcript variant X1
870	gene1396:106608394	121.455	0.348775	0.127338	2.73897	0.00616318	0.0461758	ssa01	70626766	70814317	LOC106608394	zinc finger MIZ domain-containing protein 1-like%2C transcript variant X5
871	gene1396:106608394	121.455	0.348775	0.127338	2.73897	0.00616318	0.0461758	ssa01	70626766	70814317	LOC106608394	zinc finger MIZ domain-containing protein 1-like%2C transcript variant X3
872	gene1396:106608394	121.455	0.348775	0.127338	2.73897	0.00616318	0.0461758	ssa01	70626766	70814318	LOC106608394	zinc finger MIZ domain-containing protein 1-like%2C transcript variant X2
873	gene1396:106608394	121.455	0.348775	0.127338	2.73897	0.00616318	0.0461758	ssa01	70626766	70647017	LOC106608394	zinc finger MIZ domain-containing protein 1-like%2C transcript variant X6
874	gene1396:106608394	121.455	0.348775	0.127338	2.73897	0.00616318	0.0461758	ssa01	70628008	70814319	LOC106608394	zinc finger MIZ domain-containing protein 1-like%2C transcript variant X4
875	gene1397:106608423	19754.4	-0.386136	0.117406	-3.2889	0.00100581	0.015563	ssa01	70885567	70892106	LOC106608423	40S ribosomal protein S24%2C transcript variant X1
876	gene1397:106608423	19754.4	-0.386136	0.117406	-3.2889	0.00100581	0.015563	ssa01	70885567	70892106	LOC106608423	40S ribosomal protein S24%2C transcript variant X3
877	gene1397:106608423	19754.4	-0.386136	0.117406	-3.2889	0.00100581	0.015563	ssa01	70885567	70892106	LOC106608423	40S ribosomal protein S24%2C transcript variant X2
878	gene13974:106607141	400.759	-0.353512	0.104291	-3.38967	0.000699756	0.0126048	ssa06	33981186	33991735	LOC106607141	transcription factor Sox-10-like
879	gene13976:106607138	480.43	-0.32405	0.0790046	-4.10166	4.10204e-05	0.00233985	ssa06	34024533	34028368	LOC106607138	ER lumen protein-retaining receptor 3
880	gene13993:106607120	254.377	-0.389733	0.140575	-2.77243	0.0055639	0.0434311	ssa06	34198790	34205318	LOC106607120	sterol regulatory element-binding protein 2-like
881	gene13994:100196387	153.036	-0.283187	0.0928774	-3.04904	0.00229571	0.0255609	ssa06	34206303	34208499	nol12	nucleolar protein 12
882	gene1400:106608462	3337.06	-0.330217	0.106146	-3.11096	0.00186483	0.022335	ssa01	70920609	70926982	LOC106608462	eukaryotic translation initiation factor 4E-binding protein 2-like
883	gene14006:106607377	591.484	-1.59482	0.264117	-6.0383	1.55749e-09	1.76875e-06	ssa06	34418897	34419733	LOC106607377	hemoglobin subunit beta-like
884	gene14007:100195895	936.611	-1.45394	0.24986	-5.81902	5.91949e-09	5.95542e-06	ssa06	34421693	34422525	hbae	Hemoglobin embryonic subunit alpha
885	gene14009:106607378	86.3595	-1.02004	0.251715	-4.05237	5.07018e-05	0.00260288	ssa06	34431057	34432022	LOC106607378	hemoglobin subunit beta
886	gene14010:106607381	205.48	-1.44947	0.320593	-4.52122	6.14847e-06	0.000783742	ssa06	34433192	34434085	LOC106607381	hemoglobin subunit alpha-2-like
887	gene1402:106608472	456.244	0.445715	0.120005	3.71412	0.000203908	0.00596074	ssa01	70999734	71053291	LOC106608472	testican-2-like%2C transcript variant X2
888	gene1402:106608472	456.244	0.445715	0.120005	3.71412	0.000203908	0.00596074	ssa01	70999734	71053290	LOC106608472	testican-2-like%2C transcript variant X1
889	gene14031:106607366	413.72	-0.534253	0.16851	-3.17045	0.00152201	0.0198331	ssa06	34740603	34741854	LOC106607366	DNA-directed RNA polymerase III subunit RPC10%2C transcript variant X2
890	gene14031:106607366	413.72	-0.534253	0.16851	-3.17045	0.00152201	0.0198331	ssa06	34740082	34741953	LOC106607366	DNA-directed RNA polymerase III subunit RPC10%2C transcript variant X1
891	gene14032:100196440	90.5867	-0.36191	0.116505	-3.1064	0.0018938	0.0225522	ssa06	34742045	34744296	cp033	U11/U12 small nuclear ribonucleoprotein 25 kDa protein%2C transcript variant X3
892	gene14032:100196440	90.5867	-0.36191	0.116505	-3.1064	0.0018938	0.0225522	ssa06	34741920	34744296	cp033	U11/U12 small nuclear ribonucleoprotein 25 kDa protein%2C transcript variant X2
893	gene14032:100196440	90.5867	-0.36191	0.116505	-3.1064	0.0018938	0.0225522	ssa06	34742132	34744293	cp033	U11/U12 small nuclear ribonucleoprotein 25 kDa protein
894	gene14032:100196440	90.5867	-0.36191	0.116505	-3.1064	0.0018938	0.0225522	ssa06	34742150	34744296	cp033	U11/U12 small nuclear ribonucleoprotein 25 kDa protein%2C transcript variant X1
895	gene14039:106607360	837.745	-0.486933	0.141932	-3.43074	0.000601929	0.0115644	ssa06	35002601	35017132	LOC106607360	putative E3 ubiquitin-protein ligase UNKL%2C transcript variant X5
896	gene14039:106607360	837.745	-0.486933	0.141932	-3.43074	0.000601929	0.0115644	ssa06	35002601	35017132	LOC106607360	putative E3 ubiquitin-protein ligase UNKL%2C transcript variant X4
897	gene14039:106607360	837.745	-0.486933	0.141932	-3.43074	0.000601929	0.0115644	ssa06	35002601	35017132	LOC106607360	putative E3 ubiquitin-protein ligase UNKL%2C transcript variant X6
898	gene14039:106607360	837.745	-0.486933	0.141932	-3.43074	0.000601929	0.0115644	ssa06	35002601	35017131	LOC106607360	putative E3 ubiquitin-protein ligase UNKL%2C transcript variant X1
899	gene14039:106607360	837.745	-0.486933	0.141932	-3.43074	0.000601929	0.0115644	ssa06	35002601	35017132	LOC106607360	putative E3 ubiquitin-protein ligase UNKL%2C transcript variant X2
900	gene14039:106607360	837.745	-0.486933	0.141932	-3.43074	0.000601929	0.0115644	ssa06	35002601	35017131	LOC106607360	putative E3 ubiquitin-protein ligase UNKL%2C transcript variant X3
901	gene14040:100380767	1405.98	-0.333577	0.0971439	-3.43385	0.000595083	0.0114719	ssa06	35033130	35093486	LOC100380767	myoferlin
902	gene14049:106607351	206.961	-0.358784	0.132416	-2.70951	0.0067383	0.0488347	ssa06	35315991	35336779	LOC106607351	ubiquitin carboxyl-terminal hydrolase 31-like
903	gene14073:106607335	537.745	-0.237398	0.0764306	-3.10606	0.001896	0.022557	ssa06	36154621	36155843	LOC106607335	proteasome assembly chaperone 3-like%2C transcript variant X1
904	gene14073:106607335	537.745	-0.237398	0.0764306	-3.10606	0.001896	0.022557	ssa06	36154621	36157247	LOC106607335	proteasome assembly chaperone 3-like%2C transcript variant X2
905	gene14073:106607335	537.745	-0.237398	0.0764306	-3.10606	0.001896	0.022557	ssa06	36154621	36155805	LOC106607335	proteasome assembly chaperone 3-like%2C transcript variant X3
906	gene14077:106607331	85.5935	-0.2928	0.101447	-2.88623	0.00389892	0.0351409	ssa06	36451703	36469796	LOC106607331	sorting nexin-8-like%2C transcript variant X2
907	gene14077:106607331	85.5935	-0.2928	0.101447	-2.88623	0.00389892	0.0351409	ssa06	36451703	36469795	LOC106607331	sorting nexin-8-like%2C transcript variant X1
908	gene14079:106607332	878.071	-0.409977	0.126668	-3.23661	0.00120958	0.0173679	ssa06	36547698	36555689	LOC106607332	beta-1%2C3-N-acetylglucosaminyltransferase lunatic fringe-like
909	gene14080:100136373	22225.9	-0.576123	0.173967	-3.31168	0.000927383	0.0148119	ssa06	36605499	36608509	rs11	40S ribosomal protein S11
910	gene14089:106607321	35.6601	1.05096	0.21954	4.78713	1.69187e-06	0.000361057	ssa06	36823171	36898975	LOC106607321	SRC kinase signaling inhibitor 1-like%2C transcript variant X2
911	gene14089:106607321	35.6601	1.05096	0.21954	4.78713	1.69187e-06	0.000361057	ssa06	36755763	36898975	LOC106607321	SRC kinase signaling inhibitor 1-like%2C transcript variant X3
912	gene14089:106607321	35.6601	1.05096	0.21954	4.78713	1.69187e-06	0.000361057	ssa06	36852558	36898975	LOC106607321	SRC kinase signaling inhibitor 1-like%2C transcript variant X4
913	gene14089:106607321	35.6601	1.05096	0.21954	4.78713	1.69187e-06	0.000361057	ssa06	36755763	36898975	LOC106607321	SRC kinase signaling inhibitor 1-like%2C transcript variant X1
914	gene14089:106607321	35.6601	1.05096	0.21954	4.78713	1.69187e-06	0.000361057	ssa06	36823174	36898975	LOC106607321	SRC kinase signaling inhibitor 1-like%2C transcript variant X6
915	gene14089:106607321	35.6601	1.05096	0.21954	4.78713	1.69187e-06	0.000361057	ssa06	36852558	36898975	LOC106607321	SRC kinase signaling inhibitor 1-like%2C transcript variant X5
916	gene14102:106607308	194.742	0.405584	0.138339	2.93181	0.00336996	0.0321204	ssa06	37199096	37223887	LOC106607308	C1q-related factor-like
917	gene14103:106607307	343.111	-0.275495	0.0957284	-2.87789	0.0040035	0.0356264	ssa06	37316430	37321699	LOC106607307	coiled-coil domain-containing protein 43-like
918	gene14105:106607305	285.165	-0.227462	0.0708207	-3.2118	0.00131906	0.0181739	ssa06	37334436	37337515	LOC106607305	frizzled-2-like
919	gene14114:106607295	142.315	0.263178	0.0969497	2.71458	0.00663601	0.0484212	ssa06	37582154	37674289	LOC106607295	signal transducer and activator of transcription 5B-like
920	gene14124:106607286	626.315	-0.23634	0.0661629	-3.5721	0.000354135	0.00822787	ssa06	38062801	38066778	LOC106607286	NF-kappa-B inhibitor-interacting Ras-like protein 2%2C transcript variant X3
921	gene14124:106607286	626.315	-0.23634	0.0661629	-3.5721	0.000354135	0.00822787	ssa06	38062801	38067303	LOC106607286	NF-kappa-B inhibitor-interacting Ras-like protein 2%2C transcript variant X4
922	gene14124:106607286	626.315	-0.23634	0.0661629	-3.5721	0.000354135	0.00822787	ssa06	38062801	38065361	LOC106607286	NF-kappa-B inhibitor-interacting Ras-like protein 2%2C transcript variant X1
923	gene14124:106607286	626.315	-0.23634	0.0661629	-3.5721	0.000354135	0.00822787	ssa06	38062801	38066721	LOC106607286	NF-kappa-B inhibitor-interacting Ras-like protein 2%2C transcript variant X2
924	gene14132:106607281	393.326	-0.418903	0.101048	-4.14559	3.38937e-05	0.00214027	ssa06	38130369	38162524	LOC106607281	ATP-citrate synthase%2C transcript variant X3
925	gene14132:106607281	393.326	-0.418903	0.101048	-4.14559	3.38937e-05	0.00214027	ssa06	38130368	38162524	LOC106607281	ATP-citrate synthase%2C transcript variant X1
926	gene14132:106607281	393.326	-0.418903	0.101048	-4.14559	3.38937e-05	0.00214027	ssa06	38137074	38162524	LOC106607281	ATP-citrate synthase%2C transcript variant X4
927	gene14132:106607281	393.326	-0.418903	0.101048	-4.14559	3.38937e-05	0.00214027	ssa06	38130368	38162524	LOC106607281	ATP-citrate synthase%2C transcript variant X2
928	gene14133:106607278	79.2362	-0.41457	0.122986	-3.37086	0.000749342	0.0131349	ssa06	38163025	38167705	LOC106607278	kelch-like protein 11
929	gene14137:106607276	347.897	-0.264562	0.0882266	-2.99867	0.00271162	0.0282354	ssa06	38188128	38194423	LOC106607276	synaptonemal complex protein SC65-like
930	gene14138:106607274	117.594	0.627693	0.164625	3.81287	0.00013736	0.00468826	ssa06	38199417	38220932	LOC106607274	disintegrin and metalloproteinase domain-containing protein 11-like%2C transcript variant X4
931	gene14138:106607274	117.594	0.627693	0.164625	3.81287	0.00013736	0.00468826	ssa06	38196583	38220932	LOC106607274	disintegrin and metalloproteinase domain-containing protein 11-like%2C transcript variant X5
932	gene14138:106607274	117.594	0.627693	0.164625	3.81287	0.00013736	0.00468826	ssa06	38199417	38220933	LOC106607274	disintegrin and metalloproteinase domain-containing protein 11-like%2C transcript variant X6
933	gene14138:106607274	117.594	0.627693	0.164625	3.81287	0.00013736	0.00468826	ssa06	38199417	38220934	LOC106607274	disintegrin and metalloproteinase domain-containing protein 11-like%2C transcript variant X1
934	gene14138:106607274	117.594	0.627693	0.164625	3.81287	0.00013736	0.00468826	ssa06	38196583	38220933	LOC106607274	disintegrin and metalloproteinase domain-containing protein 11-like%2C transcript variant X2
935	gene14138:106607274	117.594	0.627693	0.164625	3.81287	0.00013736	0.00468826	ssa06	38196583	38220933	LOC106607274	disintegrin and metalloproteinase domain-containing protein 11-like%2C transcript variant X3
936	gene14142:106607271	115.662	0.460403	0.11895	3.87057	0.000108579	0.00409367	ssa06	38328528	38345763	LOC106607271	cyclin-dependent kinase 12-like
937	gene14147:106607269	2578.69	-0.431232	0.159926	-2.69644	0.00700845	0.0499332	ssa06	38461114	38464133	LOC106607269	telethonin-like
938	gene14149:100195920	45.3076	-0.513519	0.157767	-3.25492	0.00113422	0.0166953	ssa06	38513300	38514659	rprml	reprimo-like
939	gene1415:106608550	10.1381	-1.20299	0.291085	-4.13279	3.5839e-05	0.00219765	ssa01	71531140	71547568	LOC106608550	solute carrier family 22 member 7-like
940	gene14155:106607262	598.859	0.505766	0.140326	3.60422	0.000313096	0.00759947	ssa06	38753946	38792758	LOC106607262	synaptic vesicle membrane protein VAT-1 homolog
941	gene14176:106607244	344.738	-0.268679	0.0810364	-3.31554	0.000914664	0.0146989	ssa06	39226093	39254904	LOC106607244	1-phosphatidylinositol 4%2C5-bisphosphate phosphodiesterase delta-3-A-like%2C transcript variant X1
942	gene14177:106607243	251.072	0.271161	0.0928666	2.9199	0.00350144	0.0330178	ssa06	39257549	39274496	LOC106607243	glycylpeptide N-tetradecanoyltransferase 1-like%2C transcript variant X4
943	gene14177:106607243	251.072	0.271161	0.0928666	2.9199	0.00350144	0.0330178	ssa06	39257549	39274496	LOC106607243	glycylpeptide N-tetradecanoyltransferase 1-like%2C transcript variant X2
944	gene14177:106607243	251.072	0.271161	0.0928666	2.9199	0.00350144	0.0330178	ssa06	39257552	39274496	LOC106607243	glycylpeptide N-tetradecanoyltransferase 1-like%2C transcript variant X3
945	gene14177:106607243	251.072	0.271161	0.0928666	2.9199	0.00350144	0.0330178	ssa06	39257552	39274496	LOC106607243	glycylpeptide N-tetradecanoyltransferase 1-like%2C transcript variant X1
946	gene14197:106607507	332.223	-0.494084	0.114906	-4.29989	1.70881e-05	0.00149975	ssa06	39892885	39898503	LOC106607507	uncharacterized LOC106607507
947	gene14199:106607505	523.539	-0.4641	0.125525	-3.69728	0.000217921	0.00618819	ssa06	39905119	39916923	LOC106607505	MBT domain-containing protein 1-like%2C transcript variant X1
948	gene14199:106607505	523.539	-0.4641	0.125525	-3.69728	0.000217921	0.00618819	ssa06	39905119	39916200	LOC106607505	MBT domain-containing protein 1-like%2C transcript variant X2
949	gene14199:106607505	523.539	-0.4641	0.125525	-3.69728	0.000217921	0.00618819	ssa06	39908666	39916923	LOC106607505	MBT domain-containing protein 1-like%2C transcript variant X3
950	gene14201:100195993	33.9047	0.944544	0.278398	3.39279	0.000691856	0.012562	ssa06	39958784	40013387	stx1b	syntaxin 1B
951	gene14225:100196645	127.445	-0.469667	0.147173	-3.19127	0.0014165	0.0189928	ssa06	40695064	40699943	hoxb7ab	homeobox protein HoxB7ab
952	gene14227:100194490	50.2106	-0.558064	0.146737	-3.80317	0.000142859	0.00476583	ssa06	40709016	40711690	hoxb6ab	homeobox protein HoxB6ab
953	gene14228:106607486	105.713	-0.44798	0.113282	-3.95455	7.66792e-05	0.00332981	ssa06	40712954	40718213	LOC106607486	homeobox protein Hox-B5a-like
954	gene1423:106609202	123.078	0.550744	0.119121	4.6234	3.775e-06	0.000604888	ssa01	72268063	73360509	macrod2	MACRO domain containing 2%2C transcript variant X2
955	gene1423:106609202	123.078	0.550744	0.119121	4.6234	3.775e-06	0.000604888	ssa01	72268068	73360505	macrod2	MACRO domain containing 2%2C transcript variant X1
956	gene14233:106607482	301.285	0.558828	0.146295	3.81987	0.00013352	0.00460331	ssa06	41111099	41124944	LOC106607482	nuclear factor erythroid 2-related factor 1-like
957	gene14234:106607483	1542.2	-0.548001	0.128176	-4.27539	1.90804e-05	0.00159904	ssa06	41125155	41137139	LOC106607483	coatomer subunit zeta-1-like%2C transcript variant X6
958	gene14234:106607483	1542.2	-0.548001	0.128176	-4.27539	1.90804e-05	0.00159904	ssa06	41125155	41137139	LOC106607483	coatomer subunit zeta-1-like%2C transcript variant X1
959	gene14234:106607483	1542.2	-0.548001	0.128176	-4.27539	1.90804e-05	0.00159904	ssa06	41125155	41137139	LOC106607483	coatomer subunit zeta-1-like%2C transcript variant X2
960	gene14234:106607483	1542.2	-0.548001	0.128176	-4.27539	1.90804e-05	0.00159904	ssa06	41125155	41137139	LOC106607483	coatomer subunit zeta-1-like%2C transcript variant X5
961	gene14239:106607477	1301.83	1.00064	0.192717	5.19228	2.07737e-07	9.15901e-05	ssa06	41262924	41271441	LOC106607477	pyruvate dehydrogenase (acetyl-transferring) kinase isozyme 2%2C mitochondrial-like%2C transcript variant X1
962	gene14239:106607477	1301.83	1.00064	0.192717	5.19228	2.07737e-07	9.15901e-05	ssa06	41263593	41271441	LOC106607477	pyruvate dehydrogenase (acetyl-transferring) kinase isozyme 2%2C mitochondrial-like%2C transcript variant X2
963	gene14241:106607476	149.578	-0.388697	0.103161	-3.76788	0.00016464	0.00519802	ssa06	41309784	41319729	nags	N-acetylglutamate synthase
964	gene14243:106607532	2225.7	-0.871664	0.229532	-3.79757	0.000146123	0.00482322	ssa06	41375003	41377469	LOC106607532	guanine nucleotide-binding protein G(I)/G(S)/G(O) subunit gamma-T2-like
965	gene14257:106607467	84.1729	-0.534407	0.158826	-3.36472	0.000766211	0.0132876	ssa06	41968935	42007802	LOC106607467	MAGUK p55 subfamily member 2-like%2C transcript variant X1
966	gene14257:106607467	84.1729	-0.534407	0.158826	-3.36472	0.000766211	0.0132876	ssa06	41970826	42007802	LOC106607467	MAGUK p55 subfamily member 2-like%2C transcript variant X2
967	gene14265:106607463	73.0694	-0.656736	0.145098	-4.52615	6.00682e-06	0.000775125	ssa06	42127627	42133370	LOC106607463	interferon a3-like%2C transcript variant X2
968	gene14265:106607463	73.0694	-0.656736	0.145098	-4.52615	6.00682e-06	0.000775125	ssa06	42132387	42133799	LOC106607463	interferon a3-like%2C transcript variant X1
969	gene14273:106607460	553.572	-0.505162	0.109865	-4.59803	4.26497e-06	0.000651751	ssa06	42268117	42321414	LOC106607460	sodium channel protein type 4 subunit alpha B-like%2C transcript variant X3
970	gene14273:106607460	553.572	-0.505162	0.109865	-4.59803	4.26497e-06	0.000651751	ssa06	42265702	42321415	LOC106607460	sodium channel protein type 4 subunit alpha B-like%2C transcript variant X1
971	gene14273:106607460	553.572	-0.505162	0.109865	-4.59803	4.26497e-06	0.000651751	ssa06	42268117	42321417	LOC106607460	sodium channel protein type 4 subunit alpha B-like%2C transcript variant X2
972	gene14273:106607460	553.572	-0.505162	0.109865	-4.59803	4.26497e-06	0.000651751	ssa06	42268117	42318541	LOC106607460	sodium channel protein type 4 subunit alpha B-like%2C transcript variant X4
973	gene14275:106607459	897.707	-0.410719	0.11942	-3.43927	0.000583277	0.01132	ssa06	42361508	42408317	LOC106607459	microtubule-associated protein tau-like%2C transcript variant X8
974	gene14275:106607459	897.707	-0.410719	0.11942	-3.43927	0.000583277	0.01132	ssa06	42361508	42408317	LOC106607459	microtubule-associated protein tau-like%2C transcript variant X4
975	gene14275:106607459	897.707	-0.410719	0.11942	-3.43927	0.000583277	0.01132	ssa06	42361508	42408317	LOC106607459	microtubule-associated protein tau-like%2C transcript variant X1
976	gene14275:106607459	897.707	-0.410719	0.11942	-3.43927	0.000583277	0.01132	ssa06	42364864	42408317	LOC106607459	microtubule-associated protein tau-like%2C transcript variant X3
977	gene14275:106607459	897.707	-0.410719	0.11942	-3.43927	0.000583277	0.01132	ssa06	42361508	42408317	LOC106607459	microtubule-associated protein tau-like%2C transcript variant X9
978	gene14275:106607459	897.707	-0.410719	0.11942	-3.43927	0.000583277	0.01132	ssa06	42361508	42408317	LOC106607459	microtubule-associated protein tau-like%2C transcript variant X7
979	gene14275:106607459	897.707	-0.410719	0.11942	-3.43927	0.000583277	0.01132	ssa06	42361508	42408317	LOC106607459	microtubule-associated protein tau-like%2C transcript variant X2
980	gene14275:106607459	897.707	-0.410719	0.11942	-3.43927	0.000583277	0.01132	ssa06	42361508	42405176	LOC106607459	microtubule-associated protein tau-like%2C transcript variant X6
981	gene14275:106607459	897.707	-0.410719	0.11942	-3.43927	0.000583277	0.01132	ssa06	42364864	42408317	LOC106607459	microtubule-associated protein tau-like%2C transcript variant X5
982	gene14333:106607549	15.4264	0.651902	0.233664	2.78991	0.00527224	0.0420697	ssa06	44434809	44448556	LOC106607549	ras GTPase-activating protein 3-like
983	gene14350:106607562	87.5362	0.497125	0.158959	3.12737	0.00176376	0.021622	ssa06	46158977	46180830	LOC106607562	sine oculis-binding protein homolog%2C transcript variant X2
984	gene14350:106607562	87.5362	0.497125	0.158959	3.12737	0.00176376	0.021622	ssa06	46158979	46180829	LOC106607562	sine oculis-binding protein homolog%2C transcript variant X1
985	gene14365:106607575	1264.94	-0.302766	0.0617735	-4.90122	9.52428e-07	0.000260534	ssa06	46903153	46908508	LOC106607575	zinc finger CCHC domain-containing protein 10-like%2C transcript variant X1
986	gene14365:106607575	1264.94	-0.302766	0.0617735	-4.90122	9.52428e-07	0.000260534	ssa06	46903153	46908508	LOC106607575	zinc finger CCHC domain-containing protein 10-like%2C transcript variant X2
987	gene14373:106607584	469.777	0.236161	0.0825345	2.86136	0.00421833	0.0367529	ssa06	47141088	47297722	LOC106607584	serine/threonine-protein phosphatase 2A 56 kDa regulatory subunit alpha isoform-like
988	gene14377:100380852	302.791	-0.313859	0.0951705	-3.29786	0.00097426	0.0152385	ssa06	47468735	47552163	LOC100380852	ectonucleotide pyrophosphatase/phosphodiesterase family member 1%2C transcript variant X2
989	gene14377:100380852	302.791	-0.313859	0.0951705	-3.29786	0.00097426	0.0152385	ssa06	47468735	47544665	LOC100380852	ectonucleotide pyrophosphatase/phosphodiesterase family member 1%2C transcript variant X1
990	gene14382:106607589	127.775	-0.343848	0.119629	-2.87429	0.00404935	0.0359097	ssa06	47765841	47769257	LOC106607589	H2.0-like homeobox protein%2C transcript variant X2
991	gene14382:106607589	127.775	-0.343848	0.119629	-2.87429	0.00404935	0.0359097	ssa06	47765841	47769257	LOC106607589	H2.0-like homeobox protein%2C transcript variant X1
992	gene14383:106607590	130.525	-0.367378	0.121832	-3.01544	0.00256604	0.0273637	ssa06	47925474	47953617	LOC106607590	dual specificity protein phosphatase 10-like%2C transcript variant X1
993	gene14383:106607590	130.525	-0.367378	0.121832	-3.01544	0.00256604	0.0273637	ssa06	47925474	47953622	LOC106607590	dual specificity protein phosphatase 10-like%2C transcript variant X2
994	gene14391:100195351	355.642	-0.334535	0.079754	-4.19459	2.7337e-05	0.00190424	ssa06	48279543	48290988	ikbe	NF-kappa-B inhibitor epsilon
995	gene14396:106607599	1282.06	-0.280918	0.0801504	-3.50489	0.000456796	0.00965669	ssa06	48395482	48398516	LOC106607599	proteasome subunit alpha type-6
996	gene14411:106607642	357.73	0.732656	0.255537	2.86713	0.00414219	0.0363969	ssa06	49002435	49013297	LOC106607642	creatine kinase B-type-like
997	gene14413:106607644	464.229	0.196871	0.0710337	2.77152	0.00557952	0.0435168	ssa06	49151710	49182950	LOC106607644	eukaryotic translation initiation factor 5-like%2C transcript variant X2
998	gene14413:106607644	464.229	0.196871	0.0710337	2.77152	0.00557952	0.0435168	ssa06	49151710	49182950	LOC106607644	eukaryotic translation initiation factor 5-like%2C transcript variant X1
999	gene14417:106607648	386.214	-0.39495	0.117302	-3.36695	0.000760045	0.0132505	ssa06	49448689	49455503	LOC106607648	cell division cycle-associated protein 4-like%2C transcript variant X3
1000	gene14417:106607648	386.214	-0.39495	0.117302	-3.36695	0.000760045	0.0132505	ssa06	49448689	49455504	LOC106607648	cell division cycle-associated protein 4-like%2C transcript variant X1
1001	gene14417:106607648	386.214	-0.39495	0.117302	-3.36695	0.000760045	0.0132505	ssa06	49448689	49455504	LOC106607648	cell division cycle-associated protein 4-like%2C transcript variant X2
1002	gene14419:106607651	550.959	-0.169234	0.0558315	-3.03115	0.00243625	0.0265137	ssa06	49542945	49561524	LOC106607651	activator of 90 kDa heat shock protein ATPase homolog 1-like
1003	gene14420:106607650	609.696	-0.236997	0.0724212	-3.27248	0.00106608	0.0161196	ssa06	49562176	49607720	LOC106607650	protein sel-1 homolog 1-like%2C transcript variant X1
1004	gene14420:106607650	609.696	-0.236997	0.0724212	-3.27248	0.00106608	0.0161196	ssa06	49562176	49607720	LOC106607650	protein sel-1 homolog 1-like%2C transcript variant X2
1005	gene14421:106607652	233.004	-0.492565	0.114943	-4.2853	1.82489e-05	0.00155431	ssa06	49624982	49654702	LOC106607652	ankyrin repeat and SOCS box protein 2-like%2C transcript variant X3
1006	gene14421:106607652	233.004	-0.492565	0.114943	-4.2853	1.82489e-05	0.00155431	ssa06	49624982	49654702	LOC106607652	ankyrin repeat and SOCS box protein 2-like%2C transcript variant X2
1007	gene14421:106607652	233.004	-0.492565	0.114943	-4.2853	1.82489e-05	0.00155431	ssa06	49624982	49654702	LOC106607652	ankyrin repeat and SOCS box protein 2-like%2C transcript variant X1
1008	gene14431:100195308	434.87	-0.255576	0.0659657	-3.87438	0.000106898	0.00404249	ssa06	50770300	50774926	e2f6	Transcription factor E2F6%2C transcript variant X1
1009	gene14431:100195308	434.87	-0.255576	0.0659657	-3.87438	0.000106898	0.00404249	ssa06	50770327	50774922	e2f6	Transcription factor E2F6
1010	gene14438:106607664	1053.52	-0.319732	0.105131	-3.04129	0.00235569	0.025989	ssa06	51005846	51013584	rrm2	ribonucleotide reductase M2
1011	gene14461:106607684	662.295	-0.28596	0.0943952	-3.02939	0.00245045	0.0265721	ssa06	51813481	51815350	LOC106607684	N-alpha-acetyltransferase 20-like
1012	gene14464:106607687	2368.02	-0.341573	0.101911	-3.35166	0.000803276	0.0136988	ssa06	52014907	52110256	col12a1	collagen%2C type XII%2C alpha 1%2C transcript variant X7
1013	gene14464:106607687	2368.02	-0.341573	0.101911	-3.35166	0.000803276	0.0136988	ssa06	52017364	52110257	col12a1	collagen%2C type XII%2C alpha 1%2C transcript variant X5
1014	gene14464:106607687	2368.02	-0.341573	0.101911	-3.35166	0.000803276	0.0136988	ssa06	52014907	52110257	col12a1	collagen%2C type XII%2C alpha 1%2C transcript variant X6
1015	gene14464:106607687	2368.02	-0.341573	0.101911	-3.35166	0.000803276	0.0136988	ssa06	52014907	52110256	col12a1	collagen%2C type XII%2C alpha 1%2C transcript variant X8
1016	gene14464:106607687	2368.02	-0.341573	0.101911	-3.35166	0.000803276	0.0136988	ssa06	52014907	52110257	col12a1	collagen%2C type XII%2C alpha 1%2C transcript variant X1
1017	gene14464:106607687	2368.02	-0.341573	0.101911	-3.35166	0.000803276	0.0136988	ssa06	52014907	52110257	col12a1	collagen%2C type XII%2C alpha 1%2C transcript variant X3
1018	gene14464:106607687	2368.02	-0.341573	0.101911	-3.35166	0.000803276	0.0136988	ssa06	52014907	52110257	col12a1	collagen%2C type XII%2C alpha 1%2C transcript variant X2
1019	gene14464:106607687	2368.02	-0.341573	0.101911	-3.35166	0.000803276	0.0136988	ssa06	52014907	52110257	col12a1	collagen%2C type XII%2C alpha 1%2C transcript variant X4
1020	gene14464:106607687	2368.02	-0.341573	0.101911	-3.35166	0.000803276	0.0136988	ssa06	52017364	52110252	col12a1	collagen%2C type XII%2C alpha 1%2C transcript variant X9
1021	gene14474:106607698	202.164	0.217224	0.06872	3.16101	0.00157225	0.0202132	ssa06	52611739	52644099	LOC106607698	sorting nexin-14-like%2C transcript variant X5
1022	gene14474:106607698	202.164	0.217224	0.06872	3.16101	0.00157225	0.0202132	ssa06	52611739	52644099	LOC106607698	sorting nexin-14-like%2C transcript variant X2
1023	gene14474:106607698	202.164	0.217224	0.06872	3.16101	0.00157225	0.0202132	ssa06	52611739	52644099	LOC106607698	sorting nexin-14-like%2C transcript variant X3
1024	gene14474:106607698	202.164	0.217224	0.06872	3.16101	0.00157225	0.0202132	ssa06	52611739	52644099	LOC106607698	sorting nexin-14-like%2C transcript variant X4
1025	gene14474:106607698	202.164	0.217224	0.06872	3.16101	0.00157225	0.0202132	ssa06	52611739	52644099	LOC106607698	sorting nexin-14-like%2C transcript variant X6
1026	gene14474:106607698	202.164	0.217224	0.06872	3.16101	0.00157225	0.0202132	ssa06	52611739	52644099	LOC106607698	sorting nexin-14-like%2C transcript variant X1
1027	gene14488:106607710	136.813	0.465546	0.119565	3.89367	9.8739e-05	0.00388759	ssa06	53053707	53056886	pnrc1	proline-rich nuclear receptor coactivator 1
1028	gene14510:106607727	15141.4	-0.599989	0.167579	-3.58034	0.000343154	0.00806272	ssa06	54231306	54237536	LOC106607727	collagen alpha-1(X) chain-like
1029	gene14516:106607732	6445.5	-0.34654	0.0839978	-4.12559	3.69786e-05	0.00223503	ssa06	54474266	54477779	LOC106607732	myristoylated alanine-rich C-kinase substrate-like
1030	gene14518:106607735	201.132	0.311379	0.0893122	3.4864	0.00048956	0.0101277	ssa06	54721697	54732453	tube1	tubulin%2C epsilon 1
1031	gene14525:106607741	352.747	-0.331819	0.101014	-3.28487	0.00102031	0.0157127	ssa06	54935631	54984911	LOC106607741	monocarboxylate transporter 10-like%2C transcript variant X2
1032	gene14525:106607741	352.747	-0.331819	0.101014	-3.28487	0.00102031	0.0157127	ssa06	54935631	54980881	LOC106607741	monocarboxylate transporter 10-like%2C transcript variant X3
1033	gene14525:106607741	352.747	-0.331819	0.101014	-3.28487	0.00102031	0.0157127	ssa06	54935631	54998762	LOC106607741	monocarboxylate transporter 10-like%2C transcript variant X1
1034	gene14549:106607753	1250.11	-0.500043	0.169055	-2.95787	0.00309769	0.0304654	ssa06	55540716	55545089	LOC106607753	protein THEMIS-like
1035	gene14550:106607755	751.101	-0.276919	0.0818349	-3.38387	0.000714723	0.0127459	ssa06	55546392	55702165	LOC106607755	receptor-type tyrosine-protein phosphatase kappa-like%2C transcript variant X2
1036	gene14550:106607755	751.101	-0.276919	0.0818349	-3.38387	0.000714723	0.0127459	ssa06	55546392	55702164	LOC106607755	receptor-type tyrosine-protein phosphatase kappa-like%2C transcript variant X11
1037	gene14550:106607755	751.101	-0.276919	0.0818349	-3.38387	0.000714723	0.0127459	ssa06	55546392	55702163	LOC106607755	receptor-type tyrosine-protein phosphatase kappa-like%2C transcript variant X9
1038	gene14550:106607755	751.101	-0.276919	0.0818349	-3.38387	0.000714723	0.0127459	ssa06	55546392	55702161	LOC106607755	receptor-type tyrosine-protein phosphatase kappa-like%2C transcript variant X13
1039	gene14550:106607755	751.101	-0.276919	0.0818349	-3.38387	0.000714723	0.0127459	ssa06	55546392	55702163	LOC106607755	receptor-type tyrosine-protein phosphatase kappa-like%2C transcript variant X4
1040	gene14550:106607755	751.101	-0.276919	0.0818349	-3.38387	0.000714723	0.0127459	ssa06	55546392	55702160	LOC106607755	receptor-type tyrosine-protein phosphatase kappa-like%2C transcript variant X15
1041	gene14550:106607755	751.101	-0.276919	0.0818349	-3.38387	0.000714723	0.0127459	ssa06	55546392	55702164	LOC106607755	receptor-type tyrosine-protein phosphatase kappa-like%2C transcript variant X7
1042	gene14550:106607755	751.101	-0.276919	0.0818349	-3.38387	0.000714723	0.0127459	ssa06	55546392	55702162	LOC106607755	receptor-type tyrosine-protein phosphatase kappa-like%2C transcript variant X10
1043	gene14550:106607755	751.101	-0.276919	0.0818349	-3.38387	0.000714723	0.0127459	ssa06	55546392	55702165	LOC106607755	receptor-type tyrosine-protein phosphatase kappa-like%2C transcript variant X3
1044	gene14550:106607755	751.101	-0.276919	0.0818349	-3.38387	0.000714723	0.0127459	ssa06	55546392	55702164	LOC106607755	receptor-type tyrosine-protein phosphatase kappa-like%2C transcript variant X8
1045	gene14550:106607755	751.101	-0.276919	0.0818349	-3.38387	0.000714723	0.0127459	ssa06	55546392	55702159	LOC106607755	receptor-type tyrosine-protein phosphatase kappa-like%2C transcript variant X16
1046	gene14550:106607755	751.101	-0.276919	0.0818349	-3.38387	0.000714723	0.0127459	ssa06	55546392	55702164	LOC106607755	receptor-type tyrosine-protein phosphatase kappa-like%2C transcript variant X5
1047	gene14550:106607755	751.101	-0.276919	0.0818349	-3.38387	0.000714723	0.0127459	ssa06	55546392	55702161	LOC106607755	receptor-type tyrosine-protein phosphatase kappa-like%2C transcript variant X14
1048	gene14550:106607755	751.101	-0.276919	0.0818349	-3.38387	0.000714723	0.0127459	ssa06	55546392	55702164	LOC106607755	receptor-type tyrosine-protein phosphatase kappa-like%2C transcript variant X6
1049	gene14550:106607755	751.101	-0.276919	0.0818349	-3.38387	0.000714723	0.0127459	ssa06	55545529	55702165	LOC106607755	receptor-type tyrosine-protein phosphatase kappa-like%2C transcript variant X1
1050	gene14550:106607755	751.101	-0.276919	0.0818349	-3.38387	0.000714723	0.0127459	ssa06	55546392	55702162	LOC106607755	receptor-type tyrosine-protein phosphatase kappa-like%2C transcript variant X12
1051	gene14570:100195662	3333.1	-0.449447	0.110777	-4.05724	4.96569e-05	0.00257036	ssa06	56677808	56689308	trdn	triadin
1052	gene14600:106607789	28.3668	-0.566395	0.1977	-2.86492	0.00417117	0.0365316	ssa06	58004916	58020152	LOC106607789	tudor domain-containing protein 15-like
1053	gene14624:106607810	744.537	-0.298342	0.0780123	-3.8243	0.000131146	0.00455921	ssa06	58730379	58772218	LOC106607810	scavenger receptor class A member 5-like%2C transcript variant X2
1054	gene14624:106607810	744.537	-0.298342	0.0780123	-3.8243	0.000131146	0.00455921	ssa06	58730383	58777886	LOC106607810	scavenger receptor class A member 5-like%2C transcript variant X1
1055	gene14628:106607813	439.608	-0.28485	0.103126	-2.76216	0.00574206	0.0442776	ssa06	58828871	58840836	LOC106607813	scavenger receptor class A member 3-like
1056	gene14629:106607816	461.925	0.495659	0.158822	3.12084	0.00180336	0.021914	ssa06	58860813	58876600	LOC106607816	clusterin-like
1057	gene14634:106607818	346.592	-0.317964	0.0923614	-3.44261	0.000576124	0.0112524	ssa06	58952417	58955194	cited2	Cbp/p300-interacting transactivator%2C with Glu/Asp-rich carboxy-terminal domain%2C 2
1058	gene14640:106607821	153.294	0.382685	0.125046	3.06035	0.00221078	0.0249625	ssa06	59406764	59502364	hivep2	human immunodeficiency virus type I enhancer binding protein 2%2C transcript variant X1
1059	gene14640:106607821	153.294	0.382685	0.125046	3.06035	0.00221078	0.0249625	ssa06	59406764	59502364	hivep2	human immunodeficiency virus type I enhancer binding protein 2%2C transcript variant X4
1060	gene14640:106607821	153.294	0.382685	0.125046	3.06035	0.00221078	0.0249625	ssa06	59406764	59467581	hivep2	human immunodeficiency virus type I enhancer binding protein 2%2C transcript variant X3
1061	gene14640:106607821	153.294	0.382685	0.125046	3.06035	0.00221078	0.0249625	ssa06	59406764	59489077	hivep2	human immunodeficiency virus type I enhancer binding protein 2%2C transcript variant X2
1062	gene14645:106607825	207.74	0.449419	0.127482	3.52534	0.000422932	0.00919048	ssa06	59602450	59606305	LOC106607825	cyclic AMP-dependent transcription factor ATF-3-like
1063	gene14646:100196581	23.8793	-0.651384	0.217532	-2.99442	0.00274965	0.0284429	ssa06	59618098	59619481	batf3	basic leucine zipper transcription factor%2C ATF-like 3%2C transcript variant X1
1064	gene14646:100196581	23.8793	-0.651384	0.217532	-2.99442	0.00274965	0.0284429	ssa06	59618197	59619406	batf3	basic leucine zipper transcription factor%2C ATF-like 3
1065	gene1466:106609350	272.089	-0.332906	0.0962317	-3.45942	0.000541342	0.0107969	ssa01	74275429	74285412	LOC106609350	PHD finger-like domain-containing protein 5A%2C transcript variant X1
1066	gene1466:106609350	272.089	-0.332906	0.0962317	-3.45942	0.000541342	0.0107969	ssa01	74275429	74284717	LOC106609350	PHD finger-like domain-containing protein 5A%2C transcript variant X2
1067	gene14667:106607847	121.028	-0.26396	0.0916206	-2.88102	0.00396396	0.0354543	ssa06	60230502	60246778	LOC106607847	zinc transporter 2-like%2C transcript variant X1
1068	gene14667:106607847	121.028	-0.26396	0.0916206	-2.88102	0.00396396	0.0354543	ssa06	60230502	60255115	LOC106607847	zinc transporter 2-like%2C transcript variant X3
1069	gene14667:106607847	121.028	-0.26396	0.0916206	-2.88102	0.00396396	0.0354543	ssa06	60230502	60254820	LOC106607847	zinc transporter 2-like%2C transcript variant X4
1070	gene14667:106607847	121.028	-0.26396	0.0916206	-2.88102	0.00396396	0.0354543	ssa06	60230502	60255115	LOC106607847	zinc transporter 2-like%2C transcript variant X2
1071	gene14688:106607862	251.728	-0.267423	0.085151	-3.14058	0.00168615	0.0210424	ssa06	60886681	60889494	LOC106607862	signal recognition particle 9 kDa protein-like
1072	gene14689:106607863	824.484	-0.36448	0.111935	-3.25619	0.0011292	0.0166418	ssa06	60891641	61074564	enah	enabled homolog (Drosophila)%2C transcript variant X3
1073	gene14689:106607863	824.484	-0.36448	0.111935	-3.25619	0.0011292	0.0166418	ssa06	60995107	61074564	enah	enabled homolog (Drosophila)%2C transcript variant X4
1074	gene14689:106607863	824.484	-0.36448	0.111935	-3.25619	0.0011292	0.0166418	ssa06	60986123	61074564	enah	enabled homolog (Drosophila)%2C transcript variant X2
1075	gene14689:106607863	824.484	-0.36448	0.111935	-3.25619	0.0011292	0.0166418	ssa06	60995104	61074564	enah	enabled homolog (Drosophila)%2C transcript variant X1
1076	gene14693:106607868	10.3307	0.916309	0.304126	3.01293	0.00258741	0.0274661	ssa06	61364789	61392290	LOC106607868	patched domain-containing protein 1-like
1077	gene14695:106607869	64.4331	0.647951	0.225165	2.87767	0.0040062	0.035628	ssa06	61487414	61493014	LOC106607869	trichohyalin-like
1078	gene14713:106607886	280.097	-0.321689	0.119125	-2.70042	0.00692519	0.0496325	ssa06	62077074	62079810	LOC106607886	uncharacterized LOC106607886%2C transcript variant X1
1079	gene14713:106607886	280.097	-0.321689	0.119125	-2.70042	0.00692519	0.0496325	ssa06	62077074	62079810	LOC106607886	uncharacterized LOC106607886%2C transcript variant X3
1080	gene14713:106607886	280.097	-0.321689	0.119125	-2.70042	0.00692519	0.0496325	ssa06	62077074	62079789	LOC106607886	uncharacterized LOC106607886%2C transcript variant X2
1081	gene14713:106607886	280.097	-0.321689	0.119125	-2.70042	0.00692519	0.0496325	ssa06	62077074	62079775	LOC106607886	uncharacterized LOC106607886%2C transcript variant X4
1082	gene14721:106607891	199.897	-0.387675	0.132903	-2.91698	0.00353436	0.0331715	ssa06	62256895	62284168	LOC106607891	centrosomal protein of 170 kDa protein B-like%2C transcript variant X2
1083	gene14721:106607891	199.897	-0.387675	0.132903	-2.91698	0.00353436	0.0331715	ssa06	62256895	62284168	LOC106607891	centrosomal protein of 170 kDa protein B-like%2C transcript variant X1
1084	gene14721:106607891	199.897	-0.387675	0.132903	-2.91698	0.00353436	0.0331715	ssa06	62256895	62284168	LOC106607891	centrosomal protein of 170 kDa protein B-like%2C transcript variant X3
1085	gene14724:106607895	535.641	-0.169675	0.0580513	-2.92284	0.00346857	0.0327922	ssa06	62367625	62390929	LOC106607895	fasciculation and elongation protein zeta-2-like%2C transcript variant X2
1086	gene14724:106607895	535.641	-0.169675	0.0580513	-2.92284	0.00346857	0.0327922	ssa06	62367625	62390929	LOC106607895	fasciculation and elongation protein zeta-2-like%2C transcript variant X1
1087	gene14725:106607896	774.865	0.22701	0.0723134	3.13926	0.00169377	0.0211093	ssa06	62391357	62414068	LOC106607896	WD repeat-containing protein 26-like%2C transcript variant X1
1088	gene14725:106607896	774.865	0.22701	0.0723134	3.13926	0.00169377	0.0211093	ssa06	62391357	62414068	LOC106607896	WD repeat-containing protein 26-like%2C transcript variant X2
1089	gene14734:106607948	61.8298	0.670045	0.157174	4.26309	2.01624e-05	0.00162147	ssa06	62791889	62798772	LOC106607948	failed axon connections homolog
1090	gene14743:106607941	103.266	0.420118	0.136043	3.08812	0.00201426	0.0234458	ssa06	63097252	63102199	LOC106607941	protein SOGA3-like%2C transcript variant X3
1091	gene14753:100380689	435.802	-0.234011	0.0720611	-3.24739	0.00116468	0.01701	ssa06	63292858	63302775	fdft1	farnesyl-diphosphate farnesyltransferase 1%2C transcript variant X3
1092	gene14753:100380689	435.802	-0.234011	0.0720611	-3.24739	0.00116468	0.01701	ssa06	63290372	63302775	fdft1	farnesyl-diphosphate farnesyltransferase 1%2C transcript variant X2
1093	gene14753:100380689	435.802	-0.234011	0.0720611	-3.24739	0.00116468	0.01701	ssa06	63292893	63302775	fdft1	farnesyl-diphosphate farnesyltransferase 1%2C transcript variant X1
1094	gene14753:100380689	435.802	-0.234011	0.0720611	-3.24739	0.00116468	0.01701	ssa06	63290653	63302775	fdft1	farnesyl-diphosphate farnesyltransferase 1%2C transcript variant X4
1095	gene14763:106607928	926.538	-0.401614	0.0982594	-4.08728	4.36458e-05	0.00240617	ssa06	63637426	63664462	smyd2	SET and MYND domain containing 2
1096	gene14766:106607958	445.528	-0.36243	0.112769	-3.21392	0.00130938	0.0180917	ssa06	63891277	63953924	fndc1	fibronectin type III domain containing 1
1097	gene14776:106607967	188.15	0.544912	0.12276	4.43885	9.044e-06	0.00100574	ssa06	64328682	64418122	LOC106607967	forkhead box protein O3-like%2C transcript variant X1
1098	gene14779:106607965	536.567	0.569134	0.113219	5.02686	4.98586e-07	0.000162478	ssa06	64477459	64547748	sesn1	sestrin 1%2C transcript variant X2
1099	gene14779:106607965	536.567	0.569134	0.113219	5.02686	4.98586e-07	0.000162478	ssa06	64477459	64547748	sesn1	sestrin 1%2C transcript variant X1
1100	gene14779:106607965	536.567	0.569134	0.113219	5.02686	4.98586e-07	0.000162478	ssa06	64477459	64485149	sesn1	sestrin 1%2C transcript variant X3
1101	gene14779:106607965	536.567	0.569134	0.113219	5.02686	4.98586e-07	0.000162478	ssa06	64477459	64547678	sesn1	sestrin 1%2C transcript variant X5
1102	gene14779:106607965	536.567	0.569134	0.113219	5.02686	4.98586e-07	0.000162478	ssa06	64477459	64485139	sesn1	sestrin 1%2C transcript variant X4
1103	gene14802:106607995	412.244	-0.505713	0.159981	-3.16108	0.00157188	0.0202132	ssa06	66212406	66255667	LOC106607995	metabotropic glutamate receptor 1-like%2C transcript variant X2
1104	gene14802:106607995	412.244	-0.505713	0.159981	-3.16108	0.00157188	0.0202132	ssa06	66212406	66256143	LOC106607995	metabotropic glutamate receptor 1-like%2C transcript variant X3
1105	gene14802:106607995	412.244	-0.505713	0.159981	-3.16108	0.00157188	0.0202132	ssa06	66212406	66256146	LOC106607995	metabotropic glutamate receptor 1-like%2C transcript variant X1
1106	gene14802:106607995	412.244	-0.505713	0.159981	-3.16108	0.00157188	0.0202132	ssa06	66215618	66256142	LOC106607995	metabotropic glutamate receptor 1-like%2C transcript variant X4
1107	gene1481:100194526	384.262	0.208187	0.0640852	3.2486	0.00115974	0.016951	ssa01	74564115	74571518	maffl	v-maf musculoaponeurotic fibrosarcoma oncogene-like
1108	gene14818:100136461	60.5977	-0.64402	0.168791	-3.8155	0.000135908	0.00465991	ssa06	66958234	66981696	esr1	estrogen receptor 1%2C transcript variant X2
1109	gene14818:100136461	60.5977	-0.64402	0.168791	-3.8155	0.000135908	0.00465991	ssa06	66958836	66981696	esr1	estrogen receptor 1%2C transcript variant X1
1110	gene14818:100136461	60.5977	-0.64402	0.168791	-3.8155	0.000135908	0.00465991	ssa06	66958234	66981696	esr1	estrogen receptor 1%2C transcript variant X3
1111	gene14818:100136461	60.5977	-0.64402	0.168791	-3.8155	0.000135908	0.00465991	ssa06	66958234	66981696	esr1	estrogen receptor 1%2C transcript variant X4
1112	gene14818:100136461	60.5977	-0.64402	0.168791	-3.8155	0.000135908	0.00465991	ssa06	66959115	66980390	esr1	estrogen receptor 1
1113	gene14820:106608012	112.593	0.263172	0.0908898	2.8955	0.0037855	0.0344752	ssa06	67184937	67187776	myct1	myc target 1
1114	gene14822:100196269	2578.31	-0.5279	0.13395	-3.94101	8.11391e-05	0.00342192	ssa06	67202820	67204107	gtf2h5	general transcription factor IIH%2C polypeptide 5
1115	gene14829:106608019	12.5919	0.5742	0.209202	2.74471	0.00605641	0.0456864	ssa06	67293581	67300508	gen1	GEN1 Holliday junction 5' flap endonuclease
1116	gene14841:106608028	396.123	0.285404	0.0949934	3.00447	0.00266047	0.0279141	ssa06	67650381	67665535	LOC106608028	heme-binding protein 2-like
1117	gene14842:106608029	169.577	0.378013	0.117603	3.2143	0.00130762	0.0180917	ssa06	67670202	67703931	nhsl1	NHS-like 1%2C transcript variant X6
1118	gene14842:106608029	169.577	0.378013	0.117603	3.2143	0.00130762	0.0180917	ssa06	67670202	67759679	nhsl1	NHS-like 1%2C transcript variant X9
1119	gene14842:106608029	169.577	0.378013	0.117603	3.2143	0.00130762	0.0180917	ssa06	67670202	67700529	nhsl1	NHS-like 1%2C transcript variant X5
1120	gene14842:106608029	169.577	0.378013	0.117603	3.2143	0.00130762	0.0180917	ssa06	67670202	67835113	nhsl1	NHS-like 1%2C transcript variant X4
1121	gene14842:106608029	169.577	0.378013	0.117603	3.2143	0.00130762	0.0180917	ssa06	67670202	67723355	nhsl1	NHS-like 1%2C transcript variant X2
1122	gene14842:106608029	169.577	0.378013	0.117603	3.2143	0.00130762	0.0180917	ssa06	67670202	67759679	nhsl1	NHS-like 1%2C transcript variant X3
1123	gene14842:106608029	169.577	0.378013	0.117603	3.2143	0.00130762	0.0180917	ssa06	67673057	67835114	nhsl1	NHS-like 1%2C transcript variant X8
1124	gene14842:106608029	169.577	0.378013	0.117603	3.2143	0.00130762	0.0180917	ssa06	67670202	67835112	nhsl1	NHS-like 1%2C transcript variant X1
1125	gene14842:106608029	169.577	0.378013	0.117603	3.2143	0.00130762	0.0180917	ssa06	67670202	67736284	nhsl1	NHS-like 1%2C transcript variant X7
1126	gene14845:106608031	233.849	-0.260684	0.0832038	-3.13308	0.00172984	0.0213706	ssa06	67857412	67872995	LOC106608031	protein lin-9 homolog%2C transcript variant X3
1127	gene14845:106608031	233.849	-0.260684	0.0832038	-3.13308	0.00172984	0.0213706	ssa06	67857412	67873023	LOC106608031	protein lin-9 homolog%2C transcript variant X2
1128	gene14845:106608031	233.849	-0.260684	0.0832038	-3.13308	0.00172984	0.0213706	ssa06	67857412	67873023	LOC106608031	protein lin-9 homolog%2C transcript variant X1
1129	gene14860:106608043	3220.99	-0.462986	0.0947224	-4.88783	1.01956e-06	0.000269366	ssa06	68583531	68610698	fkbp1b	FK506 binding protein 1B%2C 12.6 kDa
1130	gene14877:106608062	20.479	0.679518	0.218831	3.10523	0.00190134	0.0225704	ssa06	69758782	69830917	LOC106608062	1-phosphatidylinositol 4%2C5-bisphosphate phosphodiesterase beta-1-like%2C transcript variant X3
1131	gene14877:106608062	20.479	0.679518	0.218831	3.10523	0.00190134	0.0225704	ssa06	69758782	69835209	LOC106608062	1-phosphatidylinositol 4%2C5-bisphosphate phosphodiesterase beta-1-like%2C transcript variant X1
1132	gene14877:106608062	20.479	0.679518	0.218831	3.10523	0.00190134	0.0225704	ssa06	69758782	69834558	LOC106608062	1-phosphatidylinositol 4%2C5-bisphosphate phosphodiesterase beta-1-like%2C transcript variant X2
1133	gene14885:106608077	154.53	-0.53747	0.143479	-3.74598	0.000179689	0.0054882	ssa06	70330732	70339256	LOC106608077	galectin-3-like%2C transcript variant X1
1134	gene14885:106608077	154.53	-0.53747	0.143479	-3.74598	0.000179689	0.0054882	ssa06	70333338	70339256	LOC106608077	galectin-3-like%2C transcript variant X9
1135	gene14885:106608077	154.53	-0.53747	0.143479	-3.74598	0.000179689	0.0054882	ssa06	70330751	70339256	LOC106608077	galectin-3-like%2C transcript variant X7
1136	gene14885:106608077	154.53	-0.53747	0.143479	-3.74598	0.000179689	0.0054882	ssa06	70326770	70339256	LOC106608077	galectin-3-like%2C transcript variant X8
1137	gene14885:106608077	154.53	-0.53747	0.143479	-3.74598	0.000179689	0.0054882	ssa06	70333337	70339256	LOC106608077	galectin-3-like%2C transcript variant X5
1138	gene14885:106608077	154.53	-0.53747	0.143479	-3.74598	0.000179689	0.0054882	ssa06	70330751	70339256	LOC106608077	galectin-3-like%2C transcript variant X2
1139	gene14885:106608077	154.53	-0.53747	0.143479	-3.74598	0.000179689	0.0054882	ssa06	70330732	70339256	LOC106608077	galectin-3-like%2C transcript variant X6
1140	gene14885:106608077	154.53	-0.53747	0.143479	-3.74598	0.000179689	0.0054882	ssa06	70326770	70339256	LOC106608077	galectin-3-like%2C transcript variant X4
1141	gene14885:106608077	154.53	-0.53747	0.143479	-3.74598	0.000179689	0.0054882	ssa06	70330888	70339256	LOC106608077	galectin-3-like%2C transcript variant X3
1142	gene14893:106608079	41.7371	-0.553637	0.183432	-3.01822	0.00254264	0.0272018	ssa06	70716909	70760754	LOC106608079	ena/VASP-like protein
1143	gene14908:100286649	11511.5	-0.33095	0.122333	-2.70532	0.00682378	0.0492306	ssa06	71095832	71109911	rs30	40S ribosomal protein S30
1144	gene14909:106608082	2746.19	-0.19832	0.062507	-3.17277	0.00150993	0.0197604	ssa06	71111864	71115009	LOC106608082	peptidyl-prolyl cis-trans isomerase FKBP3-like
1145	gene14920:106608137	460.337	-0.504558	0.138162	-3.65193	0.000260277	0.00686429	ssa06	72144452	72149825	LOC106608137	heat shock protein HSP 90-alpha 1
1146	gene14922:106608134	553.292	0.263779	0.0893917	2.95082	0.00316929	0.0309101	ssa06	72162107	72202063	LOC106608134	serine/threonine-protein phosphatase 2A 56 kDa regulatory subunit gamma isoform-like%2C transcript variant X3
1147	gene14922:106608134	553.292	0.263779	0.0893917	2.95082	0.00316929	0.0309101	ssa06	72162107	72202063	LOC106608134	serine/threonine-protein phosphatase 2A 56 kDa regulatory subunit gamma isoform-like%2C transcript variant X1
1148	gene14922:106608134	553.292	0.263779	0.0893917	2.95082	0.00316929	0.0309101	ssa06	72176784	72202063	LOC106608134	serine/threonine-protein phosphatase 2A 56 kDa regulatory subunit gamma isoform-like%2C transcript variant X5
1149	gene14922:106608134	553.292	0.263779	0.0893917	2.95082	0.00316929	0.0309101	ssa06	72176784	72202063	LOC106608134	serine/threonine-protein phosphatase 2A 56 kDa regulatory subunit gamma isoform-like%2C transcript variant X6
1150	gene14922:106608134	553.292	0.263779	0.0893917	2.95082	0.00316929	0.0309101	ssa06	72162107	72202063	LOC106608134	serine/threonine-protein phosphatase 2A 56 kDa regulatory subunit gamma isoform-like%2C transcript variant X4
1151	gene14922:106608134	553.292	0.263779	0.0893917	2.95082	0.00316929	0.0309101	ssa06	72162107	72202063	LOC106608134	serine/threonine-protein phosphatase 2A 56 kDa regulatory subunit gamma isoform-like%2C transcript variant X2
1152	gene1494:100380409	56.0272	-0.396518	0.139408	-2.84429	0.00445105	0.0379038	ssa01	75163035	75179539	rhbl4	Rhomboid-like protease 4%2C transcript variant X3
1153	gene1494:100380409	56.0272	-0.396518	0.139408	-2.84429	0.00445105	0.0379038	ssa01	75163035	75179533	rhbl4	Rhomboid-like protease 4
1154	gene1494:100380409	56.0272	-0.396518	0.139408	-2.84429	0.00445105	0.0379038	ssa01	75163035	75179438	rhbl4	Rhomboid-like protease 4%2C transcript variant X2
1155	gene1494:100380409	56.0272	-0.396518	0.139408	-2.84429	0.00445105	0.0379038	ssa01	75163035	75243859	rhbl4	Rhomboid-like protease 4%2C transcript variant X1
1156	gene14944:106608115	2356.75	-0.285793	0.0874681	-3.26739	0.00108543	0.0162841	ssa06	73086558	73095614	LOC106608115	splicing factor 3B subunit 6
1157	gene14951:106608110	12449	-0.33643	0.0806982	-4.16899	3.05946e-05	0.0020263	ssa06	73980005	73983848	LOC106608110	40S ribosomal protein S7
1158	gene14959:106608146	28.2086	0.764455	0.182299	4.19342	2.74775e-05	0.00190943	ssa06	74333666	74337145	LOC106608146	kelch repeat and BTB domain-containing protein 11-like
1159	gene1496:106609615	289.357	-1.37645	0.246497	-5.58403	2.35012e-08	1.79741e-05	ssa01	75294648	75295487	LOC106609615	hemoglobin subunit beta-2-like
1160	gene14964:106608186	316.374	-0.23848	0.0838119	-2.84542	0.00443535	0.0378201	ssa06	74515487	74525881	LOC106608186	BTB/POZ domain-containing protein 9-like
1161	gene14971:106608183	140.344	-0.418679	0.142306	-2.94211	0.00325984	0.031397	ssa06	74636693	74684870	dnah8	dynein%2C axonemal%2C heavy chain 8%2C transcript variant X2
1162	gene14971:106608183	140.344	-0.418679	0.142306	-2.94211	0.00325984	0.031397	ssa06	74636693	74685536	dnah8	dynein%2C axonemal%2C heavy chain 8%2C transcript variant X1
1163	gene14985:106608175	36.4606	0.531782	0.160685	3.30947	0.000934733	0.0148495	ssa06	75386623	75420327	LOC106608175	uncharacterized protein C14orf132-like
1164	gene15003:106608159	402.941	0.260962	0.0933936	2.79422	0.00520248	0.0417222	ssa06	76173483	76239408	LOC106608159	sushi domain-containing protein 6-like%2C transcript variant X1
1165	gene15006:106608157	1160.32	-0.249116	0.0874825	-2.84761	0.0044049	0.0376784	ssa06	76277658	76300163	LOC106608157	protein max%2C transcript variant X2
1166	gene15006:106608157	1160.32	-0.249116	0.0874825	-2.84761	0.0044049	0.0376784	ssa06	76277657	76300163	LOC106608157	protein max%2C transcript variant X5
1167	gene15006:106608157	1160.32	-0.249116	0.0874825	-2.84761	0.0044049	0.0376784	ssa06	76277662	76300163	LOC106608157	protein max%2C transcript variant X1
1168	gene15006:106608157	1160.32	-0.249116	0.0874825	-2.84761	0.0044049	0.0376784	ssa06	76277654	76300163	LOC106608157	protein max%2C transcript variant X6
1169	gene15006:106608157	1160.32	-0.249116	0.0874825	-2.84761	0.0044049	0.0376784	ssa06	76277659	76300163	LOC106608157	protein max%2C transcript variant X3
1170	gene15006:106608157	1160.32	-0.249116	0.0874825	-2.84761	0.0044049	0.0376784	ssa06	76277656	76300163	LOC106608157	protein max%2C transcript variant X4
1171	gene15007:106608156	113.382	-0.294992	0.10483	-2.81399	0.00489301	0.0401864	ssa06	76305226	76346514	LOC106608156	protein farnesyltransferase subunit beta-like
1172	gene15020:106608197	428.684	-0.259942	0.0769368	-3.37864	0.000728457	0.0128939	ssa06	76839725	76847105	LOC106608197	bifunctional lysine-specific demethylase and histidyl-hydroxylase NO66-like
1173	gene15023:106608207	40.6377	0.612538	0.205152	2.98577	0.00282862	0.0289283	ssa06	77080916	77107019	LOC106608207	sodium/potassium/calcium exchanger 4-like%2C transcript variant X1
1174	gene15023:106608207	40.6377	0.612538	0.205152	2.98577	0.00282862	0.0289283	ssa06	77080916	77107019	LOC106608207	sodium/potassium/calcium exchanger 4-like%2C transcript variant X2
1175	gene15040:106608229	157.62	0.427144	0.121678	3.51044	0.000447366	0.00951523	ssa06	78160990	78197256	LOC106608229	forkhead box protein N3-like
1176	gene15089:106608269	54.6933	0.461398	0.156012	2.95745	0.00310191	0.0304871	ssa06	81664835	81711043	ino80	INO80 complex subunit
1177	gene15091:106608274	149.091	-0.387943	0.131734	-2.94489	0.00323071	0.0312437	ssa06	81738546	81741579	LOC106608274	DNA helicase INO80-like
1178	gene15092:100195306	1731.53	-0.246733	0.0856106	-2.88204	0.00395106	0.0354149	ssa06	81745177	81747248	chac1	ChaC%2C cation transport regulator-like 1
1179	gene15096:106608277	47.2333	0.671301	0.204562	3.28165	0.00103203	0.015812	ssa06	81960839	81983387	LOC106608277	stathmin-4-like
1180	gene15103:106608313	14.0078	0.975492	0.254679	3.83028	0.000127997	0.00448302	ssa06	82132575	82136116	paqr8	progestin and adipoQ receptor family member VIII
1181	gene15126:106608296	56.46	0.573952	0.137272	4.18114	2.90048e-05	0.00196206	ssa06	83021156	83082379	LOC106608296	feline leukemia virus subgroup C receptor-related protein 2-like%2C transcript variant X2
1182	gene15126:106608296	56.46	0.573952	0.137272	4.18114	2.90048e-05	0.00196206	ssa06	83021156	83082380	LOC106608296	feline leukemia virus subgroup C receptor-related protein 2-like%2C transcript variant X3
1183	gene15130:106608294	37.4417	1.04581	0.245023	4.26823	1.97029e-05	0.00161573	ssa06	83156215	83158302	LOC106608294	proto-oncogene c-Fos-like
1184	gene15131:106608292	4266.63	-0.278563	0.0961841	-2.89614	0.00377783	0.0344458	ssa06	83167534	83179210	LOC106608292	transmembrane emp24 domain-containing protein 10-like
1185	gene15137:106608317	117.68	0.264045	0.0972926	2.71393	0.006649	0.0484593	ssa06	83370236	83412354	LOC106608317	protein-tyrosine kinase 2-beta-like
1186	gene15156:106608340	7.55614	0.858681	0.271075	3.16769	0.00153657	0.0199499	ssa06	84457879	84458627	LOC106608340	fibronectin type III domain-containing protein 4-like
1187	gene15162:106608343	7.11039	1.10398	0.382286	2.88784	0.003879	0.0350376	ssa06	84779940	84785970	LOC106608343	XK-related protein 6
1188	gene15163:106608344	12.7213	1.0382	0.354759	2.92649	0.00342813	0.0325412	ssa06	84786355	84789716	LOC106608344	uncharacterized LOC106608344%2C transcript variant X1
1189	gene15163:106608344	12.7213	1.0382	0.354759	2.92649	0.00342813	0.0325412	ssa06	84786355	84789307	LOC106608344	uncharacterized LOC106608344%2C transcript variant X2
1190	gene15165:106608345	90.0387	0.70108	0.138427	5.06462	4.09216e-07	0.000144677	ssa06	84840769	84863473	LOC106608345	L-threonine 3-dehydrogenase%2C mitochondrial-like%2C transcript variant X2
1191	gene15165:106608345	90.0387	0.70108	0.138427	5.06462	4.09216e-07	0.000144677	ssa06	84840769	84863473	LOC106608345	L-threonine 3-dehydrogenase%2C mitochondrial-like%2C transcript variant X1
1192	gene15165:106608345	90.0387	0.70108	0.138427	5.06462	4.09216e-07	0.000144677	ssa06	84843782	84863473	LOC106608345	L-threonine 3-dehydrogenase%2C mitochondrial-like%2C transcript variant X3
1193	gene15167:106608347	42.9835	1.6579	0.206449	8.03058	9.7014e-16	6.0595e-12	ssa06	84901369	84924813	myb	v-myb avian myeloblastosis viral oncogene homolog
1194	gene15179:106608361	241.565	0.514259	0.0945373	5.43975	5.3355e-08	3.22505e-05	ssa06	85571445	85586267	LOC106608361	ATP-dependent RNA helicase DDX1-like
1195	gene15183:106608365	101.735	0.593778	0.145864	4.07077	4.68575e-05	0.00249256	ssa06	85646360	85654773	LOC106608365	ATP-dependent RNA helicase DDX1-like%2C transcript variant X1
1196	gene15212:106608393	84.3349	0.904909	0.23229	3.89561	9.79532e-05	0.0038641	ssa07	71126	73526	LOC106608393	dentin sialophosphoprotein-like
1197	gene15221:106608403	463.534	0.248398	0.0653167	3.80298	0.000142967	0.00476583	ssa07	315181	329807	LOC106608403	high mobility group protein B2-like
1198	gene15222:106608405	71.059	0.454752	0.127842	3.55715	0.000374906	0.0085259	ssa07	339069	341428	LOC106608405	nascent polypeptide-associated complex subunit alpha%2C muscle-specific form-like%2C transcript variant X13
1199	gene15222:106608405	71.059	0.454752	0.127842	3.55715	0.000374906	0.0085259	ssa07	339069	341428	LOC106608405	nascent polypeptide-associated complex subunit alpha%2C muscle-specific form-like%2C transcript variant X11
1200	gene15222:106608405	71.059	0.454752	0.127842	3.55715	0.000374906	0.0085259	ssa07	339071	341428	LOC106608405	nascent polypeptide-associated complex subunit alpha%2C muscle-specific form-like%2C transcript variant X8
1201	gene15222:106608405	71.059	0.454752	0.127842	3.55715	0.000374906	0.0085259	ssa07	339068	341428	LOC106608405	nascent polypeptide-associated complex subunit alpha%2C muscle-specific form-like%2C transcript variant X15
1202	gene15222:106608405	71.059	0.454752	0.127842	3.55715	0.000374906	0.0085259	ssa07	339069	341428	LOC106608405	nascent polypeptide-associated complex subunit alpha%2C muscle-specific form-like%2C transcript variant X7
1203	gene15222:106608405	71.059	0.454752	0.127842	3.55715	0.000374906	0.0085259	ssa07	339069	341428	LOC106608405	nascent polypeptide-associated complex subunit alpha%2C muscle-specific form-like%2C transcript variant X5
1204	gene15222:106608405	71.059	0.454752	0.127842	3.55715	0.000374906	0.0085259	ssa07	339071	341428	LOC106608405	nascent polypeptide-associated complex subunit alpha%2C muscle-specific form-like%2C transcript variant X9
1205	gene15222:106608405	71.059	0.454752	0.127842	3.55715	0.000374906	0.0085259	ssa07	339070	341428	LOC106608405	nascent polypeptide-associated complex subunit alpha%2C muscle-specific form-like%2C transcript variant X16
1206	gene15222:106608405	71.059	0.454752	0.127842	3.55715	0.000374906	0.0085259	ssa07	339067	341428	LOC106608405	nascent polypeptide-associated complex subunit alpha%2C muscle-specific form-like%2C transcript variant X2
1207	gene15222:106608405	71.059	0.454752	0.127842	3.55715	0.000374906	0.0085259	ssa07	339069	341428	LOC106608405	nascent polypeptide-associated complex subunit alpha%2C muscle-specific form-like%2C transcript variant X17
1208	gene15222:106608405	71.059	0.454752	0.127842	3.55715	0.000374906	0.0085259	ssa07	339068	341428	LOC106608405	nascent polypeptide-associated complex subunit alpha%2C muscle-specific form-like%2C transcript variant X4
1209	gene15222:106608405	71.059	0.454752	0.127842	3.55715	0.000374906	0.0085259	ssa07	339068	341428	LOC106608405	nascent polypeptide-associated complex subunit alpha%2C muscle-specific form-like%2C transcript variant X1
1210	gene15222:106608405	71.059	0.454752	0.127842	3.55715	0.000374906	0.0085259	ssa07	339069	341428	LOC106608405	nascent polypeptide-associated complex subunit alpha%2C muscle-specific form-like%2C transcript variant X6
1211	gene15222:106608405	71.059	0.454752	0.127842	3.55715	0.000374906	0.0085259	ssa07	339068	341428	LOC106608405	nascent polypeptide-associated complex subunit alpha%2C muscle-specific form-like%2C transcript variant X3
1212	gene15222:106608405	71.059	0.454752	0.127842	3.55715	0.000374906	0.0085259	ssa07	339070	341428	LOC106608405	nascent polypeptide-associated complex subunit alpha%2C muscle-specific form-like%2C transcript variant X12
1213	gene15222:106608405	71.059	0.454752	0.127842	3.55715	0.000374906	0.0085259	ssa07	339070	341428	LOC106608405	nascent polypeptide-associated complex subunit alpha%2C muscle-specific form-like%2C transcript variant X10
1214	gene15222:106608405	71.059	0.454752	0.127842	3.55715	0.000374906	0.0085259	ssa07	339070	341428	LOC106608405	nascent polypeptide-associated complex subunit alpha%2C muscle-specific form-like%2C transcript variant X14
1215	gene15260:106608439	53.7799	0.810758	0.131126	6.18305	6.28759e-10	8.41549e-07	ssa07	1647628	1675822	LOC106608439	palmitoyltransferase ZDHHC3-like
1216	gene15269:106608466	56.3768	-0.379254	0.127506	-2.9744	0.00293563	0.0295916	ssa07	1984291	1990299	LOC106608466	zinc finger protein OZF-like
1217	gene1528:106609864	132866	-0.314988	0.0982894	-3.2047	0.00135204	0.0184675	ssa01	76351114	76353981	LOC106609864	parvalbumin beta 3-like
1218	gene15282:106608460	519.563	0.447715	0.101029	4.43155	9.35602e-06	0.00102823	ssa07	2520948	2561237	LOC106608460	protein phosphatase 1 regulatory subunit 14B-like%2C transcript variant X1
1219	gene15282:106608460	519.563	0.447715	0.101029	4.43155	9.35602e-06	0.00102823	ssa07	2520947	2561237	LOC106608460	protein phosphatase 1 regulatory subunit 14B-like%2C transcript variant X2
1220	gene15289:106608456	14.3034	0.861788	0.207203	4.15915	3.19437e-05	0.00207474	ssa07	2961368	2969199	LOC106608456	prospero homeobox protein 1-like
1221	gene1529:106609875	53893.7	-0.369244	0.102303	-3.60933	0.000306994	0.00751464	ssa01	76367049	76369654	LOC106609875	parvalbumin beta 2-like
1222	gene15340:106608484	1785.47	-0.298314	0.0777649	-3.8361	0.000125001	0.00443611	ssa07	3302919	3314292	LOC106608484	tetratricopeptide repeat protein 31-like%2C transcript variant X1
1223	gene15340:106608484	1785.47	-0.298314	0.0777649	-3.8361	0.000125001	0.00443611	ssa07	3304920	3314292	LOC106608484	tetratricopeptide repeat protein 31-like%2C transcript variant X3
1224	gene15340:106608484	1785.47	-0.298314	0.0777649	-3.8361	0.000125001	0.00443611	ssa07	3302919	3314292	LOC106608484	tetratricopeptide repeat protein 31-like%2C transcript variant X2
1225	gene15345:106608490	167.85	-0.37337	0.101989	-3.66088	0.000251353	0.00675732	ssa07	3382564	3406157	LOC106608490	uncharacterized LOC106608490
1226	gene1541:106609976	3011.24	-0.292314	0.0852583	-3.42857	0.000606764	0.0116134	ssa01	76567521	76574689	LOC106609976	ras-related C3 botulinum toxin substrate 1
1227	gene15437:106608544	434.902	-0.463214	0.118495	-3.90915	9.26223e-05	0.00373238	ssa07	6963739	7160570	LOC106608544	protocadherin-7-like%2C transcript variant X2
1228	gene15437:106608544	434.902	-0.463214	0.118495	-3.90915	9.26223e-05	0.00373238	ssa07	6963739	7160570	LOC106608544	protocadherin-7-like%2C transcript variant X1
1229	gene15437:106608544	434.902	-0.463214	0.118495	-3.90915	9.26223e-05	0.00373238	ssa07	6963739	7160572	LOC106608544	protocadherin-7-like%2C transcript variant X3
1230	gene15437:106608544	434.902	-0.463214	0.118495	-3.90915	9.26223e-05	0.00373238	ssa07	6968271	7160574	LOC106608544	protocadherin-7-like%2C transcript variant X6
1231	gene15437:106608544	434.902	-0.463214	0.118495	-3.90915	9.26223e-05	0.00373238	ssa07	6968307	7160573	LOC106608544	protocadherin-7-like%2C transcript variant X4
1232	gene15437:106608544	434.902	-0.463214	0.118495	-3.90915	9.26223e-05	0.00373238	ssa07	6968307	7160573	LOC106608544	protocadherin-7-like%2C transcript variant X5
1233	gene15441:106608549	59.2875	0.569803	0.138424	4.11636	3.84907e-05	0.00226137	ssa07	7993826	8054972	tbc1d14	TBC1 domain family%2C member 14%2C transcript variant X1
1234	gene15441:106608549	59.2875	0.569803	0.138424	4.11636	3.84907e-05	0.00226137	ssa07	7993827	8059425	tbc1d14	TBC1 domain family%2C member 14%2C transcript variant X2
1235	gene15441:106608549	59.2875	0.569803	0.138424	4.11636	3.84907e-05	0.00226137	ssa07	7993829	8023640	tbc1d14	TBC1 domain family%2C member 14%2C transcript variant X6
1236	gene15441:106608549	59.2875	0.569803	0.138424	4.11636	3.84907e-05	0.00226137	ssa07	7993826	8055187	tbc1d14	TBC1 domain family%2C member 14%2C transcript variant X4
1237	gene15441:106608549	59.2875	0.569803	0.138424	4.11636	3.84907e-05	0.00226137	ssa07	7993826	8055028	tbc1d14	TBC1 domain family%2C member 14%2C transcript variant X3
1238	gene15441:106608549	59.2875	0.569803	0.138424	4.11636	3.84907e-05	0.00226137	ssa07	7993829	8047283	tbc1d14	TBC1 domain family%2C member 14%2C transcript variant X5
1239	gene15443:106608552	2382.85	0.382181	0.138861	2.75226	0.00591861	0.0451559	ssa07	8091739	8093532	s100p	S100 calcium binding protein P
1240	gene15446:106608553	879.766	-0.761058	0.19815	-3.84083	0.000122621	0.00438069	ssa07	8119421	8120529	smim20	small integral membrane protein 20
1241	gene15450:106608558	114.929	-0.404666	0.123996	-3.26355	0.00110026	0.016395	ssa07	8167849	8173053	tada2b	transcriptional adaptor 2B%2C transcript variant X1
1242	gene15450:106608558	114.929	-0.404666	0.123996	-3.26355	0.00110026	0.016395	ssa07	8167849	8173053	tada2b	transcriptional adaptor 2B%2C transcript variant X2
1243	gene15452:106608564	19.5029	0.598988	0.21821	2.74501	0.00605088	0.045663	ssa07	8318521	8607849	sorcs2	sortilin-related VPS10 domain containing receptor 2%2C transcript variant X2
1244	gene15452:106608564	19.5029	0.598988	0.21821	2.74501	0.00605088	0.045663	ssa07	8318520	8607849	sorcs2	sortilin-related VPS10 domain containing receptor 2%2C transcript variant X1
1245	gene15452:106608564	19.5029	0.598988	0.21821	2.74501	0.00605088	0.045663	ssa07	8318521	8607849	sorcs2	sortilin-related VPS10 domain containing receptor 2%2C transcript variant X3
1246	gene15455:106608568	174.442	0.264531	0.0903769	2.92698	0.00342273	0.0325229	ssa07	8615323	8687773	afap1	actin filament associated protein 1%2C transcript variant X4
1247	gene15455:106608568	174.442	0.264531	0.0903769	2.92698	0.00342273	0.0325229	ssa07	8615323	8687782	afap1	actin filament associated protein 1%2C transcript variant X1
1248	gene15455:106608568	174.442	0.264531	0.0903769	2.92698	0.00342273	0.0325229	ssa07	8615323	8687779	afap1	actin filament associated protein 1%2C transcript variant X2
1249	gene15455:106608568	174.442	0.264531	0.0903769	2.92698	0.00342273	0.0325229	ssa07	8615323	8747638	afap1	actin filament associated protein 1%2C transcript variant X3
1250	gene15469:100196768	30.143	0.563476	0.175297	3.21441	0.00130712	0.0180917	ssa07	9740354	9764410	peli3	pellino homolog 3%2C transcript variant X2
1251	gene15469:100196768	30.143	0.563476	0.175297	3.21441	0.00130712	0.0180917	ssa07	9740474	9764405	peli3	pellino homolog 3
1252	gene15469:100196768	30.143	0.563476	0.175297	3.21441	0.00130712	0.0180917	ssa07	9740354	9764410	peli3	pellino homolog 3%2C transcript variant X1
1253	gene15469:100196768	30.143	0.563476	0.175297	3.21441	0.00130712	0.0180917	ssa07	9740354	9764410	peli3	pellino homolog 3%2C transcript variant X3
1254	gene15470:106608583	700.962	0.324839	0.0846925	3.83551	0.000125302	0.00444258	ssa07	9766260	9780724	LOC106608583	ras-related protein Rab-1B
1255	gene15476:106608585	315.389	-0.392554	0.133586	-2.93858	0.0032972	0.0315944	ssa07	9925555	9959062	LOC106608585	echinoderm microtubule-associated protein-like 3%2C transcript variant X2
1256	gene15476:106608585	315.389	-0.392554	0.133586	-2.93858	0.0032972	0.0315944	ssa07	9925555	9966465	LOC106608585	echinoderm microtubule-associated protein-like 3%2C transcript variant X3
1257	gene15476:106608585	315.389	-0.392554	0.133586	-2.93858	0.0032972	0.0315944	ssa07	9925555	9966471	LOC106608585	echinoderm microtubule-associated protein-like 3%2C transcript variant X1
1258	gene15483:106608593	432.438	-0.39594	0.0893018	-4.43373	9.26164e-06	0.00102085	ssa07	10080607	10083658	LOC106608593	RNA-binding protein 4.1-like%2C transcript variant X1
1259	gene15483:106608593	432.438	-0.39594	0.0893018	-4.43373	9.26164e-06	0.00102085	ssa07	10080607	10085268	LOC106608593	RNA-binding protein 4.1-like%2C transcript variant X2
1260	gene15508:106608676	357.262	0.327577	0.106712	3.06975	0.00214241	0.0244709	ssa07	11890194	11911958	LOC106608676	DNA-directed RNA polymerase II subunit RPB1-like
1261	gene1551:106610401	212.971	0.390486	0.118748	3.28835	0.00100777	0.0155869	ssa01	77076588	77116510	LOC106610401	putative sodium-coupled neutral amino acid transporter 10%2C transcript variant X9
1262	gene1551:106610401	212.971	0.390486	0.118748	3.28835	0.00100777	0.0155869	ssa01	77076588	77116510	LOC106610401	putative sodium-coupled neutral amino acid transporter 10%2C transcript variant X4
1263	gene1551:106610401	212.971	0.390486	0.118748	3.28835	0.00100777	0.0155869	ssa01	77077662	77116510	LOC106610401	putative sodium-coupled neutral amino acid transporter 10%2C transcript variant X11
1264	gene1551:106610401	212.971	0.390486	0.118748	3.28835	0.00100777	0.0155869	ssa01	77077662	77116510	LOC106610401	putative sodium-coupled neutral amino acid transporter 10%2C transcript variant X6
1265	gene1551:106610401	212.971	0.390486	0.118748	3.28835	0.00100777	0.0155869	ssa01	77076588	77116510	LOC106610401	putative sodium-coupled neutral amino acid transporter 10%2C transcript variant X2
1266	gene1551:106610401	212.971	0.390486	0.118748	3.28835	0.00100777	0.0155869	ssa01	77092162	77116510	LOC106610401	putative sodium-coupled neutral amino acid transporter 10%2C transcript variant X13
1267	gene1551:106610401	212.971	0.390486	0.118748	3.28835	0.00100777	0.0155869	ssa01	77076588	77116510	LOC106610401	putative sodium-coupled neutral amino acid transporter 10%2C transcript variant X5
1268	gene1551:106610401	212.971	0.390486	0.118748	3.28835	0.00100777	0.0155869	ssa01	77076588	77116510	LOC106610401	putative sodium-coupled neutral amino acid transporter 10%2C transcript variant X3
1269	gene1551:106610401	212.971	0.390486	0.118748	3.28835	0.00100777	0.0155869	ssa01	77076588	77116510	LOC106610401	putative sodium-coupled neutral amino acid transporter 10%2C transcript variant X8
1270	gene1551:106610401	212.971	0.390486	0.118748	3.28835	0.00100777	0.0155869	ssa01	77076588	77116510	LOC106610401	putative sodium-coupled neutral amino acid transporter 10%2C transcript variant X7
1271	gene1551:106610401	212.971	0.390486	0.118748	3.28835	0.00100777	0.0155869	ssa01	77076588	77116510	LOC106610401	putative sodium-coupled neutral amino acid transporter 10%2C transcript variant X1
1272	gene1551:106610401	212.971	0.390486	0.118748	3.28835	0.00100777	0.0155869	ssa01	77087218	77116510	LOC106610401	putative sodium-coupled neutral amino acid transporter 10%2C transcript variant X12
1273	gene1551:106610401	212.971	0.390486	0.118748	3.28835	0.00100777	0.0155869	ssa01	77077617	77116510	LOC106610401	putative sodium-coupled neutral amino acid transporter 10%2C transcript variant X10
1274	gene15515:106608670	1652.93	-0.354647	0.110505	-3.20932	0.00133047	0.0182841	ssa07	12020468	12029479	LOC106608670	eukaryotic translation initiation factor 5A-1
1275	gene1552:106610392	185.778	0.408168	0.100542	4.05969	4.91376e-05	0.00256117	ssa01	77120655	77127410	LOC106610392	AP-4 complex accessory subunit tepsin-like
1276	gene15521:106608667	359.115	-0.208428	0.0719089	-2.8985	0.00374953	0.0343072	ssa07	12079969	12085384	LOC106608667	PHD finger protein 23B-like
1277	gene15533:106608655	58.494	-0.564905	0.147651	-3.82594	0.000130276	0.00454159	ssa07	12582424	12585301	LOC106608655	myb/SANT-like DNA-binding domain-containing protein 1%2C transcript variant X1
1278	gene15533:106608655	58.494	-0.564905	0.147651	-3.82594	0.000130276	0.00454159	ssa07	12582424	12585301	LOC106608655	myb/SANT-like DNA-binding domain-containing protein 1%2C transcript variant X2
1279	gene15534:106608654	157.948	-0.459729	0.124199	-3.70157	0.00021427	0.00615325	ssa07	12590655	12607787	LOC106608654	E3 ubiquitin-protein ligase DTX4-like%2C transcript variant X2
1280	gene15534:106608654	157.948	-0.459729	0.124199	-3.70157	0.00021427	0.00615325	ssa07	12590655	12607787	LOC106608654	E3 ubiquitin-protein ligase DTX4-like%2C transcript variant X1
1281	gene15534:106608654	157.948	-0.459729	0.124199	-3.70157	0.00021427	0.00615325	ssa07	12590655	12607787	LOC106608654	E3 ubiquitin-protein ligase DTX4-like%2C transcript variant X3
1282	gene15534:106608654	157.948	-0.459729	0.124199	-3.70157	0.00021427	0.00615325	ssa07	12590655	12607787	LOC106608654	E3 ubiquitin-protein ligase DTX4-like%2C transcript variant X4
1283	gene15537:106608653	573.4	-0.34012	0.110108	-3.08897	0.00200851	0.0234124	ssa07	12627768	12643835	LOC106608653	coronin-1B-like%2C transcript variant X2
1284	gene15537:106608653	573.4	-0.34012	0.110108	-3.08897	0.00200851	0.0234124	ssa07	12627768	12643968	LOC106608653	coronin-1B-like%2C transcript variant X1
1285	gene15538:106608652	235.905	-0.332432	0.0864552	-3.84513	0.000120488	0.00431272	ssa07	12652788	12658178	LOC106608652	zinc finger HIT domain-containing protein 1-like
1286	gene15560:100194546	407.81	0.624683	0.168856	3.6995	0.000216026	0.00617394	ssa07	13124278	13126780	ddit4l	DNA-damage-inducible transcript 4-like
1287	gene15561:106608631	1536.96	-0.330276	0.106985	-3.08713	0.00202097	0.0234918	ssa07	13135203	13142504	LOC106608631	putative GPI-anchored protein PB15E9.01c
1288	gene15562:106608629	706.042	-0.216527	0.0685731	-3.15761	0.00159066	0.0203452	ssa07	13151483	13287518	LOC106608629	serine/threonine-protein phosphatase 2B catalytic subunit alpha isoform%2C transcript variant X5
1289	gene15562:106608629	706.042	-0.216527	0.0685731	-3.15761	0.00159066	0.0203452	ssa07	13151483	13287518	LOC106608629	serine/threonine-protein phosphatase 2B catalytic subunit alpha isoform%2C transcript variant X1
1290	gene15562:106608629	706.042	-0.216527	0.0685731	-3.15761	0.00159066	0.0203452	ssa07	13151483	13287518	LOC106608629	serine/threonine-protein phosphatase 2B catalytic subunit alpha isoform%2C transcript variant X4
1291	gene15562:106608629	706.042	-0.216527	0.0685731	-3.15761	0.00159066	0.0203452	ssa07	13151483	13287518	LOC106608629	serine/threonine-protein phosphatase 2B catalytic subunit alpha isoform%2C transcript variant X2
1292	gene15562:106608629	706.042	-0.216527	0.0685731	-3.15761	0.00159066	0.0203452	ssa07	13151483	13287518	LOC106608629	serine/threonine-protein phosphatase 2B catalytic subunit alpha isoform%2C transcript variant X6
1293	gene15562:106608629	706.042	-0.216527	0.0685731	-3.15761	0.00159066	0.0203452	ssa07	13151483	13287518	LOC106608629	serine/threonine-protein phosphatase 2B catalytic subunit alpha isoform%2C transcript variant X3
1294	gene15568:106608623	171.983	0.26784	0.0973871	2.75027	0.00595469	0.0452653	ssa07	13548236	13565188	LOC106608623	phospholipase A-2-activating protein-like
1295	gene15570:100196271	143.529	-0.312195	0.110085	-2.83596	0.00456882	0.038572	ssa07	13587043	13592893	cj011	CJ011 protein
1296	gene15570:100196271	143.529	-0.312195	0.110085	-2.83596	0.00456882	0.038572	ssa07	13587042	13592958	cj011	CJ011 protein%2C transcript variant X1
1297	gene15578:106608616	47.8106	0.65942	0.17361	3.79829	0.0001457	0.00482322	ssa07	14102950	14163998	LOC106608616	peroxisome proliferator-activated receptor gamma coactivator 1-alpha-like%2C transcript variant X3
1298	gene15578:106608616	47.8106	0.65942	0.17361	3.79829	0.0001457	0.00482322	ssa07	14108134	14163998	LOC106608616	peroxisome proliferator-activated receptor gamma coactivator 1-alpha-like%2C transcript variant X4
1299	gene15578:106608616	47.8106	0.65942	0.17361	3.79829	0.0001457	0.00482322	ssa07	14102950	14163998	LOC106608616	peroxisome proliferator-activated receptor gamma coactivator 1-alpha-like%2C transcript variant X8
1300	gene15578:106608616	47.8106	0.65942	0.17361	3.79829	0.0001457	0.00482322	ssa07	14103416	14163998	LOC106608616	peroxisome proliferator-activated receptor gamma coactivator 1-alpha-like%2C transcript variant X1
1301	gene15578:106608616	47.8106	0.65942	0.17361	3.79829	0.0001457	0.00482322	ssa07	14102950	14163998	LOC106608616	peroxisome proliferator-activated receptor gamma coactivator 1-alpha-like%2C transcript variant X7
1302	gene15578:106608616	47.8106	0.65942	0.17361	3.79829	0.0001457	0.00482322	ssa07	14102950	14163998	LOC106608616	peroxisome proliferator-activated receptor gamma coactivator 1-alpha-like%2C transcript variant X6
1303	gene15578:106608616	47.8106	0.65942	0.17361	3.79829	0.0001457	0.00482322	ssa07	14102950	14163998	LOC106608616	peroxisome proliferator-activated receptor gamma coactivator 1-alpha-like%2C transcript variant X2
1304	gene15578:106608616	47.8106	0.65942	0.17361	3.79829	0.0001457	0.00482322	ssa07	14079243	14163998	LOC106608616	peroxisome proliferator-activated receptor gamma coactivator 1-alpha-like%2C transcript variant X5
1305	gene15578:106608616	47.8106	0.65942	0.17361	3.79829	0.0001457	0.00482322	ssa07	14102950	14163998	LOC106608616	peroxisome proliferator-activated receptor gamma coactivator 1-alpha-like%2C transcript variant X9
1306	gene15581:106608614	44.6385	0.618018	0.150139	4.11631	3.84981e-05	0.00226137	ssa07	14515815	14698262	LOC106608614	Kv channel-interacting protein 4-like%2C transcript variant X1
1307	gene15581:106608614	44.6385	0.618018	0.150139	4.11631	3.84981e-05	0.00226137	ssa07	14598530	14698262	LOC106608614	Kv channel-interacting protein 4-like%2C transcript variant X3
1308	gene15581:106608614	44.6385	0.618018	0.150139	4.11631	3.84981e-05	0.00226137	ssa07	14586614	14698262	LOC106608614	Kv channel-interacting protein 4-like%2C transcript variant X5
1309	gene15581:106608614	44.6385	0.618018	0.150139	4.11631	3.84981e-05	0.00226137	ssa07	14433019	14698262	LOC106608614	Kv channel-interacting protein 4-like%2C transcript variant X4
1310	gene15581:106608614	44.6385	0.618018	0.150139	4.11631	3.84981e-05	0.00226137	ssa07	14629299	14698262	LOC106608614	Kv channel-interacting protein 4-like%2C transcript variant X2
1311	gene15582:106608613	197.021	-0.32976	0.107387	-3.07077	0.0021351	0.0244395	ssa07	14704508	14734282	LOC106608613	protein transport protein Sec24D-like%2C transcript variant X1
1312	gene15582:106608613	197.021	-0.32976	0.107387	-3.07077	0.0021351	0.0244395	ssa07	14704508	14734283	LOC106608613	protein transport protein Sec24D-like%2C transcript variant X2
1313	gene15582:106608613	197.021	-0.32976	0.107387	-3.07077	0.0021351	0.0244395	ssa07	14704508	14734282	LOC106608613	protein transport protein Sec24D-like%2C transcript variant X3
1314	gene15582:106608613	197.021	-0.32976	0.107387	-3.07077	0.0021351	0.0244395	ssa07	14704508	14734282	LOC106608613	protein transport protein Sec24D-like%2C transcript variant X4
1315	gene15583:106608612	545.287	-0.40527	0.101275	-4.0017	6.28899e-05	0.00294976	ssa07	14735443	14775256	LOC106608612	synaptopodin-2-like%2C transcript variant X3
1316	gene15583:106608612	545.287	-0.40527	0.101275	-4.0017	6.28899e-05	0.00294976	ssa07	14735441	14768590	LOC106608612	synaptopodin-2-like%2C transcript variant X2
1317	gene15583:106608612	545.287	-0.40527	0.101275	-4.0017	6.28899e-05	0.00294976	ssa07	14735444	14768590	LOC106608612	synaptopodin-2-like%2C transcript variant X1
1318	gene15592:106608716	202.544	-0.422849	0.111002	-3.80937	0.00013932	0.0047165	ssa07	16243873	16557135	LOC106608716	latrophilin-3-like
1319	gene15598:106608782	126.278	-0.37527	0.10696	-3.50849	0.000450654	0.00956868	ssa07	17140393	17145845	LOC106608782	B-cell CLL/lymphoma 6 member B protein-like%2C transcript variant X2
1320	gene15598:106608782	126.278	-0.37527	0.10696	-3.50849	0.000450654	0.00956868	ssa07	17140546	17145845	LOC106608782	B-cell CLL/lymphoma 6 member B protein-like%2C transcript variant X1
1321	gene15605:106608773	231.428	-0.425089	0.101855	-4.17346	3.00009e-05	0.001997	ssa07	17345912	17365121	LOC106608773	segment polarity protein dishevelled homolog DVL-2-like
1322	gene15612:100380458	714.124	-0.178186	0.0655914	-2.7166	0.00659553	0.0481915	ssa07	17541672	17544991	cnpy4	canopy FGF signaling regulator 4
1323	gene15621:106608762	468.571	-0.268637	0.0913064	-2.94214	0.00325948	0.031397	ssa07	17667160	17701269	LOC106608762	chromodomain-helicase-DNA-binding protein 3-like%2C transcript variant X5
1324	gene15621:106608762	468.571	-0.268637	0.0913064	-2.94214	0.00325948	0.031397	ssa07	17667159	17696235	LOC106608762	chromodomain-helicase-DNA-binding protein 3-like%2C transcript variant X2
1325	gene15621:106608762	468.571	-0.268637	0.0913064	-2.94214	0.00325948	0.031397	ssa07	17667159	17696235	LOC106608762	chromodomain-helicase-DNA-binding protein 3-like%2C transcript variant X4
1326	gene15621:106608762	468.571	-0.268637	0.0913064	-2.94214	0.00325948	0.031397	ssa07	17667158	17696236	LOC106608762	chromodomain-helicase-DNA-binding protein 3-like%2C transcript variant X1
1327	gene15621:106608762	468.571	-0.268637	0.0913064	-2.94214	0.00325948	0.031397	ssa07	17667158	17696236	LOC106608762	chromodomain-helicase-DNA-binding protein 3-like%2C transcript variant X3
1328	gene15624:106608758	118.781	-0.352136	0.103429	-3.40462	0.000662569	0.0123167	ssa07	17777147	17782003	LOC106608758	uncharacterized LOC106608758%2C transcript variant X1
1329	gene15624:106608758	118.781	-0.352136	0.103429	-3.40462	0.000662569	0.0123167	ssa07	17775404	17782003	LOC106608758	uncharacterized LOC106608758%2C transcript variant X2
1330	gene15630:106608755	95.4781	0.407108	0.10925	3.72638	0.000194246	0.00576829	ssa07	17953369	17974347	LOC106608755	rho guanine nucleotide exchange factor 15-like%2C transcript variant X2
1331	gene15630:106608755	95.4781	0.407108	0.10925	3.72638	0.000194246	0.00576829	ssa07	17952460	17973386	LOC106608755	rho guanine nucleotide exchange factor 15-like%2C transcript variant X1
1332	gene15630:106608755	95.4781	0.407108	0.10925	3.72638	0.000194246	0.00576829	ssa07	17953369	17969503	LOC106608755	rho guanine nucleotide exchange factor 15-like%2C transcript variant X3
1333	gene15650:106608739	26.6337	-0.662323	0.192934	-3.43289	0.000597178	0.0115063	ssa07	18355666	18358513	LOC106608739	uncharacterized LOC106608739
1334	gene15657:106608737	44.706	-0.500781	0.185585	-2.69838	0.00696768	0.0497957	ssa07	18531271	18535201	LOC106608737	uncharacterized LOC106608737
1335	gene15668:106608730	545.174	0.219299	0.0802461	2.73282	0.00627939	0.0467269	ssa07	18704292	18707250	LOC106608730	RNA-binding protein 4.1-like
1336	gene15679:106608721	12.6444	0.60152	0.214664	2.80215	0.0050764	0.0410938	ssa07	18938135	19065056	LOC106608721	fibroblast growth factor 11-like%2C transcript variant X2
1337	gene15679:106608721	12.6444	0.60152	0.214664	2.80215	0.0050764	0.0410938	ssa07	18938135	19065056	LOC106608721	fibroblast growth factor 11-like%2C transcript variant X1
1338	gene15692:106608818	415.13	-0.531337	0.154204	-3.44567	0.000569636	0.0111885	ssa07	19530394	19532178	pop7	POP7 homolog%2C ribonuclease P/MRP subunit%2C transcript variant X2
1339	gene15692:106608818	415.13	-0.531337	0.154204	-3.44567	0.000569636	0.0111885	ssa07	19530394	19532195	pop7	POP7 homolog%2C ribonuclease P/MRP subunit%2C transcript variant X1
1340	gene15710:100195582	301.65	-0.367039	0.116317	-3.1555	0.00160221	0.0204182	ssa07	20342627	20356919	srk2	Tyrosine-protein kinase SRK2
1341	gene15711:106608839	72.6626	-0.469799	0.147945	-3.17549	0.00149586	0.019649	ssa07	20374502	20382285	LOC106608839	ubiquitin carboxyl-terminal hydrolase 47-like%2C transcript variant X1
1342	gene15711:106608839	72.6626	-0.469799	0.147945	-3.17549	0.00149586	0.019649	ssa07	20374502	20382269	LOC106608839	ubiquitin carboxyl-terminal hydrolase 47-like%2C transcript variant X2
1343	gene15727:106608850	762.631	0.190422	0.063433	3.00193	0.0026827	0.0280673	ssa07	20701553	20728371	LOC106608850	apoptotic chromatin condensation inducer in the nucleus-like%2C transcript variant X1
1344	gene15727:106608850	762.631	0.190422	0.063433	3.00193	0.0026827	0.0280673	ssa07	20701553	20728371	LOC106608850	apoptotic chromatin condensation inducer in the nucleus-like%2C transcript variant X2
1345	gene15727:106608850	762.631	0.190422	0.063433	3.00193	0.0026827	0.0280673	ssa07	20701553	20728371	LOC106608850	apoptotic chromatin condensation inducer in the nucleus-like%2C transcript variant X3
1346	gene15734:106608856	368.586	-0.21126	0.0711405	-2.96961	0.00298176	0.0298303	ssa07	20796517	20798075	LOC106608856	NEDD8
1347	gene15743:100195845	1074.05	-0.339145	0.110556	-3.06763	0.00215762	0.0245623	ssa07	21178964	21183133	cssa07h4orf48	chromosome ssa07 open reading frame%2C human C4orf48
1348	gene1576:106610110	8.15149	1.11905	0.331974	3.37089	0.000749246	0.0131349	ssa01	79005165	79119605	LOC106610110	teneurin-4-like
1349	gene15773:100380360	579.007	-0.564733	0.158938	-3.55317	0.000380615	0.00859542	ssa07	21520497	21534553	f13a	Coagulation factor XIII A chain
1350	gene15775:106608877	30.3459	-0.85802	0.184636	-4.64709	3.3665e-06	0.00057873	ssa07	21559198	21563347	LOC106608877	permeability factor 2-like
1351	gene15778:106608879	100.902	-0.446248	0.116485	-3.83093	0.00012766	0.00448302	ssa07	21600714	21628366	LOC106608879	protein inturned-like%2C transcript variant X4
1352	gene15778:106608879	100.902	-0.446248	0.116485	-3.83093	0.00012766	0.00448302	ssa07	21599639	21628366	LOC106608879	protein inturned-like%2C transcript variant X5
1353	gene15778:106608879	100.902	-0.446248	0.116485	-3.83093	0.00012766	0.00448302	ssa07	21594550	21628366	LOC106608879	protein inturned-like%2C transcript variant X2
1354	gene15778:106608879	100.902	-0.446248	0.116485	-3.83093	0.00012766	0.00448302	ssa07	21594550	21628366	LOC106608879	protein inturned-like%2C transcript variant X1
1355	gene15778:106608879	100.902	-0.446248	0.116485	-3.83093	0.00012766	0.00448302	ssa07	21596196	21628366	LOC106608879	protein inturned-like%2C transcript variant X3
1356	gene15779:106608882	126.58	-0.294	0.0923204	-3.18456	0.00144973	0.019266	ssa07	21628369	21634546	LOC106608882	INO80 complex subunit B-like%2C transcript variant X1
1357	gene15779:106608882	126.58	-0.294	0.0923204	-3.18456	0.00144973	0.019266	ssa07	21628369	21634546	LOC106608882	INO80 complex subunit B-like%2C transcript variant X2
1358	gene15782:106608881	982.783	-0.207906	0.0717021	-2.89958	0.00373665	0.0342588	ssa07	21650563	21658054	LOC106608881	microfibrillar-associated protein 3-like
1359	gene1579:106610551	1827.19	-0.216955	0.0750929	-2.88916	0.00386273	0.0349482	ssa01	79498028	79512120	LOC106610551	peripheral myelin protein 22-like
1360	gene15791:106608891	6.15286	0.985474	0.349235	2.82181	0.00477541	0.0396112	ssa07	21860174	21897836	LOC106608891	galactose-3-O-sulfotransferase 3-like
1361	gene15793:106608894	317.429	0.24811	0.0727708	3.40946	0.000650905	0.0121723	ssa07	21907618	21920132	LOC106608894	RNA-binding protein 14-like%2C transcript variant X4
1362	gene15793:106608894	317.429	0.24811	0.0727708	3.40946	0.000650905	0.0121723	ssa07	21907618	21920132	LOC106608894	RNA-binding protein 14-like%2C transcript variant X2
1363	gene15793:106608894	317.429	0.24811	0.0727708	3.40946	0.000650905	0.0121723	ssa07	21907618	21920132	LOC106608894	RNA-binding protein 14-like%2C transcript variant X1
1364	gene15793:106608894	317.429	0.24811	0.0727708	3.40946	0.000650905	0.0121723	ssa07	21907618	21910325	LOC106608894	RNA-binding protein 14-like%2C transcript variant X7
1365	gene15793:106608894	317.429	0.24811	0.0727708	3.40946	0.000650905	0.0121723	ssa07	21907618	21920132	LOC106608894	RNA-binding protein 14-like%2C transcript variant X3
1366	gene15793:106608894	317.429	0.24811	0.0727708	3.40946	0.000650905	0.0121723	ssa07	21907618	21920132	LOC106608894	RNA-binding protein 14-like%2C transcript variant X5
1367	gene15793:106608894	317.429	0.24811	0.0727708	3.40946	0.000650905	0.0121723	ssa07	21907618	21920132	LOC106608894	RNA-binding protein 14-like%2C transcript variant X6
1368	gene15808:106608899	65.6766	-0.682295	0.181777	-3.75348	0.000174395	0.00539275	ssa07	21994621	22003913	LOC106608899	WAP%2C Kazal%2C immunoglobulin%2C Kunitz and NTR domain-containing protein 1-like
1369	gene15841:106608949	287.018	0.62204	0.190937	3.25784	0.00112265	0.0165984	ssa07	23262721	23301421	LOC106608949	zonadhesin-like%2C transcript variant X2
1370	gene15841:106608949	287.018	0.62204	0.190937	3.25784	0.00112265	0.0165984	ssa07	23262721	23301421	LOC106608949	zonadhesin-like%2C transcript variant X3
1371	gene15841:106608949	287.018	0.62204	0.190937	3.25784	0.00112265	0.0165984	ssa07	23262721	23301421	LOC106608949	zonadhesin-like%2C transcript variant X1
1372	gene15851:100306814	636.634	-0.22152	0.0716526	-3.09158	0.00199097	0.0232711	ssa07	23581764	23609191	acox3	acyl-CoA oxidase 3%2C pristanoyl%2C transcript variant X1
1373	gene15851:100306814	636.634	-0.22152	0.0716526	-3.09158	0.00199097	0.0232711	ssa07	23581924	23609191	acox3	acyl-CoA oxidase 3%2C pristanoyl%2C transcript variant X2
1374	gene15851:100306814	636.634	-0.22152	0.0716526	-3.09158	0.00199097	0.0232711	ssa07	23582420	23609189	acox3	acyl-CoA oxidase 3%2C pristanoyl
1375	gene15852:106608957	613.203	-0.495894	0.136725	-3.62695	0.000286786	0.00722717	ssa07	23626775	23641322	htra3	HtrA serine peptidase 3%2C transcript variant X1
1376	gene15852:106608957	613.203	-0.495894	0.136725	-3.62695	0.000286786	0.00722717	ssa07	23626775	23641322	htra3	HtrA serine peptidase 3%2C transcript variant X4
1377	gene15852:106608957	613.203	-0.495894	0.136725	-3.62695	0.000286786	0.00722717	ssa07	23626775	23641322	htra3	HtrA serine peptidase 3%2C transcript variant X3
1378	gene15852:106608957	613.203	-0.495894	0.136725	-3.62695	0.000286786	0.00722717	ssa07	23626775	23641322	htra3	HtrA serine peptidase 3%2C transcript variant X2
1379	gene15864:106608967	92.3334	0.710162	0.198328	3.58074	0.00034262	0.00806272	ssa07	23868250	23873107	LOC106608967	cerebellin-1-like
1380	gene15869:100196731	580.269	-0.226758	0.0763175	-2.97125	0.00296594	0.0297117	ssa07	24016500	24030350	plcg	1-acyl-sn-glycerol-3-phosphate acyltransferase eta
1381	gene15870:106608971	532.319	-0.255103	0.0916173	-2.78444	0.00536197	0.0425191	ssa07	24030450	24044653	LOC106608971	H/ACA ribonucleoprotein complex subunit 3%2C transcript variant X1
1382	gene15870:106608971	532.319	-0.255103	0.0916173	-2.78444	0.00536197	0.0425191	ssa07	24042162	24044653	LOC106608971	H/ACA ribonucleoprotein complex subunit 3%2C transcript variant X2
1383	gene15875:100286636	81.6787	0.457244	0.138406	3.30365	0.000954347	0.015078	ssa07	24189777	24252760	pea15	Astrocytic phosphoprotein PEA-15
1384	gene15876:100194596	73633.3	-0.394073	0.0934154	-4.2185	2.45931e-05	0.0017931	ssa07	24280268	24318323	LOC100194596	Aspartyl beta-hydroxylase-like%2C transcript variant X1
1385	gene15876:100194596	73633.3	-0.394073	0.0934154	-4.2185	2.45931e-05	0.0017931	ssa07	24280289	24318323	LOC100194596	Aspartyl beta-hydroxylase-like
1386	gene15883:106608981	602.896	-0.223233	0.0668839	-3.33761	0.000845015	0.0141271	ssa07	24504286	24531190	LOC106608981	puratrophin-1-like
1387	gene15884:106609024	7.48383	1.00641	0.341956	2.9431	0.0032494	0.031369	ssa07	24569616	24572124	LOC106609024	apolipoprotein L3-like%2C transcript variant X3
1388	gene15884:106609024	7.48383	1.00641	0.341956	2.9431	0.0032494	0.031369	ssa07	24569616	24577977	LOC106609024	apolipoprotein L3-like%2C transcript variant X2
1389	gene15884:106609024	7.48383	1.00641	0.341956	2.9431	0.0032494	0.031369	ssa07	24569616	24574268	LOC106609024	apolipoprotein L3-like%2C transcript variant X4
1390	gene15884:106609024	7.48383	1.00641	0.341956	2.9431	0.0032494	0.031369	ssa07	24569616	24574268	LOC106609024	apolipoprotein L3-like%2C transcript variant X5
1391	gene15884:106609024	7.48383	1.00641	0.341956	2.9431	0.0032494	0.031369	ssa07	24569616	24574268	LOC106609024	apolipoprotein L3-like%2C transcript variant X1
1392	gene15897:106608992	153.953	0.779585	0.218902	3.56134	0.000368961	0.008458	ssa07	24942949	24951777	LOC106608992	purine nucleoside phosphorylase-like
1393	gene15899:106608993	127.138	0.400516	0.133161	3.00777	0.00263177	0.0277591	ssa07	25000657	25019634	LOC106608993	splicing factor 3B subunit 2-like%2C transcript variant X2
1394	gene15899:106608993	127.138	0.400516	0.133161	3.00777	0.00263177	0.0277591	ssa07	25000657	25019634	LOC106608993	splicing factor 3B subunit 2-like%2C transcript variant X1
1395	gene15905:106609000	20.3211	0.631437	0.204296	3.09079	0.00199622	0.0233127	ssa07	25152297	25162978	LOC106609000	leukotriene B4 receptor 1-like%2C transcript variant X1
1396	gene15905:106609000	20.3211	0.631437	0.204296	3.09079	0.00199622	0.0233127	ssa07	25148693	25162978	LOC106609000	leukotriene B4 receptor 1-like%2C transcript variant X2
1397	gene15928:106609014	252.15	-0.436079	0.109855	-3.9696	7.19935e-05	0.00320812	ssa07	25705622	25717395	LOC106609014	vang-like protein 2
1398	gene15940:106609029	68.9357	0.445889	0.144689	3.0817	0.00205821	0.0238434	ssa07	25954695	25995846	ppp2r5b	protein phosphatase 2%2C regulatory subunit B'%2C beta
1399	gene15946:106609040	108.532	0.440036	0.156252	2.81619	0.0048597	0.0400397	ssa07	26232376	26256329	LOC106609040	leucine-rich repeat protein soc-2 homolog
1400	gene15965:106609053	1029.52	-0.471268	0.102747	-4.58667	4.50376e-06	0.0006645	ssa07	27421916	27429042	LOC106609053	cysteine and histidine-rich domain-containing protein 1-like
1401	gene15977:106609064	72.9419	0.385172	0.13714	2.8086	0.00497569	0.0405543	ssa07	28056960	28092493	LOC106609064	insulin receptor substrate 2-B-like%2C transcript variant X1
1402	gene15977:106609064	72.9419	0.385172	0.13714	2.8086	0.00497569	0.0405543	ssa07	28056960	28094539	LOC106609064	insulin receptor substrate 2-B-like%2C transcript variant X2
1403	gene15980:106609074	315.535	-0.262841	0.0753564	-3.48797	0.000486696	0.0101049	ssa07	28274090	28347342	sepsecs	Sep (O-phosphoserine) tRNA:Sec (selenocysteine) tRNA synthase%2C transcript variant X3
1404	gene15980:106609074	315.535	-0.262841	0.0753564	-3.48797	0.000486696	0.0101049	ssa07	28274090	28347342	sepsecs	Sep (O-phosphoserine) tRNA:Sec (selenocysteine) tRNA synthase%2C transcript variant X1
1405	gene15980:106609074	315.535	-0.262841	0.0753564	-3.48797	0.000486696	0.0101049	ssa07	28274090	28347336	sepsecs	Sep (O-phosphoserine) tRNA:Sec (selenocysteine) tRNA synthase%2C transcript variant X2
1406	gene15983:100194607	31541.4	-0.551797	0.167105	-3.3021	0.00095965	0.0151284	ssa07	28639962	28657157	rpl34	ribosomal protein L34%2C transcript variant X1
1407	gene15983:100194607	31541.4	-0.551797	0.167105	-3.3021	0.00095965	0.0151284	ssa07	28640550	28657157	rpl34	ribosomal protein L34
1408	gene15984:106609071	652.036	-0.290236	0.0806685	-3.59788	0.000320818	0.00769716	ssa07	28664367	28679485	LOC106609071	oligosaccharyltransferase complex subunit ostc%2C transcript variant X3
1409	gene15984:106609071	652.036	-0.290236	0.0806685	-3.59788	0.000320818	0.00769716	ssa07	28664454	28679485	LOC106609071	oligosaccharyltransferase complex subunit ostc%2C transcript variant X2
1410	gene15984:106609071	652.036	-0.290236	0.0806685	-3.59788	0.000320818	0.00769716	ssa07	28664434	28679485	LOC106609071	oligosaccharyltransferase complex subunit ostc%2C transcript variant X1
1411	gene1599:100380389	160.886	-0.265897	0.089438	-2.97297	0.00294934	0.0296644	ssa01	81645946	81653871	tbp	TATA box binding protein%2C transcript variant X1
1412	gene1599:100380389	160.886	-0.265897	0.089438	-2.97297	0.00294934	0.0296644	ssa01	81645988	81653871	tbp	TATA box binding protein
1413	gene1600:100196165	551.906	-0.271311	0.0990424	-2.73934	0.00615624	0.0461515	ssa01	81653723	81657789	pdcd2	programmed cell death 2
1414	gene16015:106609109	66.6174	0.374983	0.139003	2.69766	0.00698286	0.0498456	ssa07	31829025	32011954	LOC106609109	TBC1 domain family member 22B-like%2C transcript variant X2
1415	gene16015:106609109	66.6174	0.374983	0.139003	2.69766	0.00698286	0.0498456	ssa07	31829025	32011948	LOC106609109	TBC1 domain family member 22B-like%2C transcript variant X1
1416	gene16016:106609111	183.737	-0.294112	0.091018	-3.23136	0.00123204	0.0175759	ssa07	32114157	32182879	LOC106609111	GRAM domain-containing protein 4-like%2C transcript variant X2
1417	gene16016:106609111	183.737	-0.294112	0.091018	-3.23136	0.00123204	0.0175759	ssa07	32114157	32165434	LOC106609111	GRAM domain-containing protein 4-like%2C transcript variant X4
1418	gene16016:106609111	183.737	-0.294112	0.091018	-3.23136	0.00123204	0.0175759	ssa07	32114157	32165434	LOC106609111	GRAM domain-containing protein 4-like%2C transcript variant X3
1419	gene16016:106609111	183.737	-0.294112	0.091018	-3.23136	0.00123204	0.0175759	ssa07	32114157	32182879	LOC106609111	GRAM domain-containing protein 4-like%2C transcript variant X1
1420	gene16024:106609117	45.4737	-0.76284	0.227963	-3.34633	0.000818897	0.0138613	ssa07	32666561	32678789	cssa07h12orf40	chromosome ssa07 open reading frame%2C human C12orf40%2C transcript variant X3
1421	gene16024:106609117	45.4737	-0.76284	0.227963	-3.34633	0.000818897	0.0138613	ssa07	32666562	32678765	cssa07h12orf40	chromosome ssa07 open reading frame%2C human C12orf40%2C transcript variant X2
1422	gene16024:106609117	45.4737	-0.76284	0.227963	-3.34633	0.000818897	0.0138613	ssa07	32666561	32678771	cssa07h12orf40	chromosome ssa07 open reading frame%2C human C12orf40%2C transcript variant X1
1423	gene16025:106609118	37.5657	0.506802	0.183623	2.76001	0.00577991	0.0444271	ssa07	32679155	32752809	LOC106609118	proton myo-inositol cotransporter-like
1424	gene16040:106609130	587.64	-0.264876	0.05793	-4.57234	4.82308e-06	0.000682075	ssa07	33034889	33046999	LOC106609130	calumenin-A-like%2C transcript variant X2
1425	gene16040:106609130	587.64	-0.264876	0.05793	-4.57234	4.82308e-06	0.000682075	ssa07	33033937	33045886	LOC106609130	calumenin-A-like%2C transcript variant X1
1426	gene16040:106609130	587.64	-0.264876	0.05793	-4.57234	4.82308e-06	0.000682075	ssa07	33022956	33045886	LOC106609130	calumenin-A-like%2C transcript variant X3
1427	gene16040:106609130	587.64	-0.264876	0.05793	-4.57234	4.82308e-06	0.000682075	ssa07	33033937	33046999	LOC106609130	calumenin-A-like%2C transcript variant X4
1428	gene16052:106609143	1033.89	-0.197411	0.0678495	-2.90955	0.00361952	0.0335673	ssa07	33289988	33292368	LOC106609143	ragulator complex protein LAMTOR4
1429	gene16060:106609146	43.0255	0.598952	0.189819	3.15538	0.0016029	0.0204182	ssa07	33359505	33371211	LOC106609146	UPF0606 protein KIAA1549-like
1430	gene16068:106609255	97.9888	-0.476532	0.160249	-2.97369	0.00294243	0.0296187	ssa07	33677287	33681798	LOC106609255	synapsin-3-like
1431	gene16070:106609251	766.85	-0.201381	0.0703893	-2.86096	0.00422364	0.0367592	ssa07	33775984	33815936	LOC106609251	ras association domain-containing protein 3-like%2C transcript variant X3
1432	gene16070:106609251	766.85	-0.201381	0.0703893	-2.86096	0.00422364	0.0367592	ssa07	33775984	33803015	LOC106609251	ras association domain-containing protein 3-like%2C transcript variant X5
1433	gene16070:106609251	766.85	-0.201381	0.0703893	-2.86096	0.00422364	0.0367592	ssa07	33775984	33817021	LOC106609251	ras association domain-containing protein 3-like%2C transcript variant X4
1434	gene16070:106609251	766.85	-0.201381	0.0703893	-2.86096	0.00422364	0.0367592	ssa07	33775984	33820000	LOC106609251	ras association domain-containing protein 3-like%2C transcript variant X2
1435	gene16070:106609251	766.85	-0.201381	0.0703893	-2.86096	0.00422364	0.0367592	ssa07	33775984	33833727	LOC106609251	ras association domain-containing protein 3-like%2C transcript variant X1
1436	gene16077:106609245	385.716	-0.457873	0.107622	-4.25447	2.09541e-05	0.00164064	ssa07	34088212	34202857	LOC106609245	forkhead box protein P2-like%2C transcript variant X7
1437	gene16077:106609245	385.716	-0.457873	0.107622	-4.25447	2.09541e-05	0.00164064	ssa07	34088214	34206531	LOC106609245	forkhead box protein P2-like%2C transcript variant X12
1438	gene16077:106609245	385.716	-0.457873	0.107622	-4.25447	2.09541e-05	0.00164064	ssa07	34088214	34206531	LOC106609245	forkhead box protein P2-like%2C transcript variant X19
1439	gene16077:106609245	385.716	-0.457873	0.107622	-4.25447	2.09541e-05	0.00164064	ssa07	34088215	34206531	LOC106609245	forkhead box protein P2-like%2C transcript variant X18
1440	gene16077:106609245	385.716	-0.457873	0.107622	-4.25447	2.09541e-05	0.00164064	ssa07	34088214	34206531	LOC106609245	forkhead box protein P2-like%2C transcript variant X9
1441	gene16077:106609245	385.716	-0.457873	0.107622	-4.25447	2.09541e-05	0.00164064	ssa07	34088214	34206531	LOC106609245	forkhead box protein P2-like%2C transcript variant X8
1442	gene16077:106609245	385.716	-0.457873	0.107622	-4.25447	2.09541e-05	0.00164064	ssa07	34088214	34206531	LOC106609245	forkhead box protein P2-like%2C transcript variant X5
1443	gene16077:106609245	385.716	-0.457873	0.107622	-4.25447	2.09541e-05	0.00164064	ssa07	34141789	34202857	LOC106609245	forkhead box protein P2-like%2C transcript variant X13
1444	gene16077:106609245	385.716	-0.457873	0.107622	-4.25447	2.09541e-05	0.00164064	ssa07	34088215	34206531	LOC106609245	forkhead box protein P2-like%2C transcript variant X14
1445	gene16077:106609245	385.716	-0.457873	0.107622	-4.25447	2.09541e-05	0.00164064	ssa07	34088215	34206531	LOC106609245	forkhead box protein P2-like%2C transcript variant X11
1446	gene16077:106609245	385.716	-0.457873	0.107622	-4.25447	2.09541e-05	0.00164064	ssa07	34088215	34206531	LOC106609245	forkhead box protein P2-like%2C transcript variant X6
1447	gene16077:106609245	385.716	-0.457873	0.107622	-4.25447	2.09541e-05	0.00164064	ssa07	34088214	34206531	LOC106609245	forkhead box protein P2-like%2C transcript variant X10
1448	gene16077:106609245	385.716	-0.457873	0.107622	-4.25447	2.09541e-05	0.00164064	ssa07	34088215	34206531	LOC106609245	forkhead box protein P2-like%2C transcript variant X4
1449	gene16077:106609245	385.716	-0.457873	0.107622	-4.25447	2.09541e-05	0.00164064	ssa07	34129495	34206531	LOC106609245	forkhead box protein P2-like%2C transcript variant X15
1450	gene16077:106609245	385.716	-0.457873	0.107622	-4.25447	2.09541e-05	0.00164064	ssa07	34130980	34206531	LOC106609245	forkhead box protein P2-like%2C transcript variant X16
1451	gene16077:106609245	385.716	-0.457873	0.107622	-4.25447	2.09541e-05	0.00164064	ssa07	34088215	34206531	LOC106609245	forkhead box protein P2-like%2C transcript variant X1
1452	gene16077:106609245	385.716	-0.457873	0.107622	-4.25447	2.09541e-05	0.00164064	ssa07	34129495	34206531	LOC106609245	forkhead box protein P2-like%2C transcript variant X2
1453	gene16077:106609245	385.716	-0.457873	0.107622	-4.25447	2.09541e-05	0.00164064	ssa07	34130980	34206531	LOC106609245	forkhead box protein P2-like%2C transcript variant X3
1454	gene16077:106609245	385.716	-0.457873	0.107622	-4.25447	2.09541e-05	0.00164064	ssa07	34143086	34206531	LOC106609245	forkhead box protein P2-like%2C transcript variant X17
1455	gene16079:106609243	426.498	-0.224908	0.0721861	-3.11567	0.00183526	0.0221365	ssa07	34238241	34272604	LOC106609243	myoD family inhibitor domain-containing protein-like
1456	gene16085:106609228	522.195	0.238763	0.0793445	3.00919	0.00261943	0.0276913	ssa07	34605170	34649002	LOC106609228	putative adenosylhomocysteinase 3%2C transcript variant X1
1457	gene16085:106609228	522.195	0.238763	0.0793445	3.00919	0.00261943	0.0276913	ssa07	34608659	34649002	LOC106609228	putative adenosylhomocysteinase 3%2C transcript variant X4
1458	gene16085:106609228	522.195	0.238763	0.0793445	3.00919	0.00261943	0.0276913	ssa07	34605170	34649002	LOC106609228	putative adenosylhomocysteinase 3%2C transcript variant X2
1459	gene16085:106609228	522.195	0.238763	0.0793445	3.00919	0.00261943	0.0276913	ssa07	34608659	34649002	LOC106609228	putative adenosylhomocysteinase 3%2C transcript variant X3
1460	gene16090:106609235	190.732	0.463211	0.141662	3.26983	0.00107612	0.0162224	ssa07	34668908	34674419	LOC106609235	suppressor APC domain-containing protein 1-like
1461	gene16096:106609224	2112.07	-0.284466	0.0810345	-3.51043	0.000447375	0.00951523	ssa07	34742712	34797548	LOC106609224	caldesmon%2C smooth muscle-like%2C transcript variant X3
1462	gene16096:106609224	2112.07	-0.284466	0.0810345	-3.51043	0.000447375	0.00951523	ssa07	34742712	34797545	LOC106609224	caldesmon%2C smooth muscle-like%2C transcript variant X2
1463	gene16096:106609224	2112.07	-0.284466	0.0810345	-3.51043	0.000447375	0.00951523	ssa07	34742712	34775689	LOC106609224	caldesmon%2C smooth muscle-like%2C transcript variant X7
1464	gene16096:106609224	2112.07	-0.284466	0.0810345	-3.51043	0.000447375	0.00951523	ssa07	34742712	34797548	LOC106609224	caldesmon%2C smooth muscle-like%2C transcript variant X4
1465	gene16096:106609224	2112.07	-0.284466	0.0810345	-3.51043	0.000447375	0.00951523	ssa07	34742712	34797587	LOC106609224	caldesmon%2C smooth muscle-like%2C transcript variant X8
1466	gene16096:106609224	2112.07	-0.284466	0.0810345	-3.51043	0.000447375	0.00951523	ssa07	34742712	34775686	LOC106609224	caldesmon%2C smooth muscle-like%2C transcript variant X5
1467	gene16096:106609224	2112.07	-0.284466	0.0810345	-3.51043	0.000447375	0.00951523	ssa07	34742712	34775686	LOC106609224	caldesmon%2C smooth muscle-like%2C transcript variant X1
1468	gene16097:106609223	881.536	-0.365589	0.119054	-3.07078	0.00213497	0.0244395	ssa07	34816224	34825606	LOC106609223	troponin I%2C slow skeletal muscle-like%2C transcript variant X2
1469	gene16097:106609223	881.536	-0.365589	0.119054	-3.07078	0.00213497	0.0244395	ssa07	34816224	34825576	LOC106609223	troponin I%2C slow skeletal muscle-like%2C transcript variant X4
1470	gene16097:106609223	881.536	-0.365589	0.119054	-3.07078	0.00213497	0.0244395	ssa07	34816224	34825587	LOC106609223	troponin I%2C slow skeletal muscle-like%2C transcript variant X1
1471	gene16097:106609223	881.536	-0.365589	0.119054	-3.07078	0.00213497	0.0244395	ssa07	34816224	34825576	LOC106609223	troponin I%2C slow skeletal muscle-like%2C transcript variant X5
1472	gene16097:106609223	881.536	-0.365589	0.119054	-3.07078	0.00213497	0.0244395	ssa07	34816224	34825576	LOC106609223	troponin I%2C slow skeletal muscle-like%2C transcript variant X3
1473	gene16113:106609207	607.359	-0.275986	0.0842107	-3.27733	0.00104793	0.0159774	ssa07	35589180	35607140	LOC106609207	nicotinamide phosphoribosyltransferase-like
1474	gene16116:106609204	129.271	-0.64535	0.166456	-3.87701	0.000105749	0.0040282	ssa07	35670511	35699453	LOC106609204	zinc finger protein 800-like
1475	gene16119:106609201	127.331	0.39543	0.126238	3.13242	0.00173369	0.0213793	ssa07	36270604	36280085	LOC106609201	prosaposin receptor GPR37-like%2C transcript variant X3
1476	gene16119:106609201	127.331	0.39543	0.126238	3.13242	0.00173369	0.0213793	ssa07	36270600	36280085	LOC106609201	prosaposin receptor GPR37-like%2C transcript variant X2
1477	gene16119:106609201	127.331	0.39543	0.126238	3.13242	0.00173369	0.0213793	ssa07	36270603	36280085	LOC106609201	prosaposin receptor GPR37-like%2C transcript variant X1
1478	gene16125:106609195	3165.32	-0.391323	0.118937	-3.29016	0.0010013	0.0155253	ssa07	36415666	36420002	LOC106609195	NADH dehydrogenase [ubiquinone] 1 alpha subcomplex subunit 5-like
1479	gene1614:106610792	20.6697	0.598681	0.221803	2.69916	0.00695149	0.0497354	ssa01	82294115	82341312	LOC106610792	pecanex-like protein 2%2C transcript variant X3
1480	gene1614:106610792	20.6697	0.598681	0.221803	2.69916	0.00695149	0.0497354	ssa01	82294115	82341312	LOC106610792	pecanex-like protein 2%2C transcript variant X4
1481	gene1614:106610792	20.6697	0.598681	0.221803	2.69916	0.00695149	0.0497354	ssa01	82294115	82341312	LOC106610792	pecanex-like protein 2%2C transcript variant X1
1482	gene1614:106610792	20.6697	0.598681	0.221803	2.69916	0.00695149	0.0497354	ssa01	82294115	82341312	LOC106610792	pecanex-like protein 2%2C transcript variant X2
1483	gene16141:106609175	331.433	-0.452835	0.121832	-3.71688	0.000201702	0.00591556	ssa07	37174313	37183560	LOC106609175	protein LCHN-like
1484	gene16148:106609180	182.969	-0.651728	0.219261	-2.97238	0.00295503	0.0296877	ssa07	37328240	37329614	LOC106609180	LYR motif-containing protein 5-like%2C transcript variant X1
1485	gene16148:106609180	182.969	-0.651728	0.219261	-2.97238	0.00295503	0.0296877	ssa07	37328321	37329614	LOC106609180	LYR motif-containing protein 5-like%2C transcript variant X2
1486	gene16154:106609171	165.273	-0.400061	0.132877	-3.01075	0.00260599	0.0275953	ssa07	37395323	37408548	LOC106609171	FYVE%2C RhoGEF and PH domain-containing protein 4-like%2C transcript variant X1
1487	gene16154:106609171	165.273	-0.400061	0.132877	-3.01075	0.00260599	0.0275953	ssa07	37395323	37408547	LOC106609171	FYVE%2C RhoGEF and PH domain-containing protein 4-like%2C transcript variant X3
1488	gene16154:106609171	165.273	-0.400061	0.132877	-3.01075	0.00260599	0.0275953	ssa07	37395323	37403416	LOC106609171	FYVE%2C RhoGEF and PH domain-containing protein 4-like%2C transcript variant X2
1489	gene16170:100196809	31.0449	0.489637	0.164323	2.97972	0.00288509	0.0292854	ssa07	37962889	37987550	st4a1	Sulfotransferase 4A1
1490	gene16180:106609311	98.476	0.634472	0.137109	4.62749	3.70119e-06	0.00059787	ssa07	38316521	38331121	LOC106609311	importin-8-like%2C transcript variant X4
1491	gene16180:106609311	98.476	0.634472	0.137109	4.62749	3.70119e-06	0.00059787	ssa07	38316521	38331121	LOC106609311	importin-8-like%2C transcript variant X5
1492	gene16180:106609311	98.476	0.634472	0.137109	4.62749	3.70119e-06	0.00059787	ssa07	38319994	38331122	LOC106609311	importin-8-like%2C transcript variant X3
1493	gene16180:106609311	98.476	0.634472	0.137109	4.62749	3.70119e-06	0.00059787	ssa07	38316520	38331122	LOC106609311	importin-8-like%2C transcript variant X2
1494	gene16180:106609311	98.476	0.634472	0.137109	4.62749	3.70119e-06	0.00059787	ssa07	38319549	38331122	LOC106609311	importin-8-like%2C transcript variant X7
1495	gene16180:106609311	98.476	0.634472	0.137109	4.62749	3.70119e-06	0.00059787	ssa07	38316520	38331122	LOC106609311	importin-8-like%2C transcript variant X1
1496	gene16180:106609311	98.476	0.634472	0.137109	4.62749	3.70119e-06	0.00059787	ssa07	38320722	38331121	LOC106609311	importin-8-like%2C transcript variant X8
1497	gene16180:106609311	98.476	0.634472	0.137109	4.62749	3.70119e-06	0.00059787	ssa07	38319995	38331121	LOC106609311	importin-8-like%2C transcript variant X6
1498	gene16197:106609291	12.9967	0.633998	0.227508	2.7867	0.00532474	0.0423313	ssa07	39255893	39266246	LOC106609291	plexin-C1-like%2C transcript variant X4
1499	gene16197:106609291	12.9967	0.633998	0.227508	2.7867	0.00532474	0.0423313	ssa07	39255893	39265039	LOC106609291	plexin-C1-like%2C transcript variant X1
1500	gene16197:106609291	12.9967	0.633998	0.227508	2.7867	0.00532474	0.0423313	ssa07	39255893	39259509	LOC106609291	plexin-C1-like%2C transcript variant X3
1501	gene16197:106609291	12.9967	0.633998	0.227508	2.7867	0.00532474	0.0423313	ssa07	39255893	39265039	LOC106609291	plexin-C1-like%2C transcript variant X2
1502	gene16197:106609291	12.9967	0.633998	0.227508	2.7867	0.00532474	0.0423313	ssa07	39255917	39258956	LOC106609291	plexin-C1-like%2C transcript variant X5
1503	gene16198:106609289	75.6473	0.527252	0.122587	4.30104	1.69997e-05	0.00149901	ssa07	39265294	39289643	LOC106609289	plexin-C1-like%2C transcript variant X1
1504	gene16198:106609289	75.6473	0.527252	0.122587	4.30104	1.69997e-05	0.00149901	ssa07	39265294	39289643	LOC106609289	plexin-C1-like%2C transcript variant X3
1505	gene16198:106609289	75.6473	0.527252	0.122587	4.30104	1.69997e-05	0.00149901	ssa07	39265294	39289643	LOC106609289	plexin-C1-like%2C transcript variant X2
1506	gene16211:106609278	428.146	-0.528351	0.121016	-4.36597	1.26558e-05	0.00122555	ssa07	39479859	39483995	LOC106609278	ADP-sugar pyrophosphatase-like%2C transcript variant X1
1507	gene16211:106609278	428.146	-0.528351	0.121016	-4.36597	1.26558e-05	0.00122555	ssa07	39479786	39483995	LOC106609278	ADP-sugar pyrophosphatase-like%2C transcript variant X2
1508	gene16216:106609272	39.1294	-0.49923	0.129233	-3.86301	0.000111997	0.00415319	ssa07	39589140	39604220	prkcq	protein kinase C%2C theta%2C transcript variant X3
1509	gene16216:106609272	39.1294	-0.49923	0.129233	-3.86301	0.000111997	0.00415319	ssa07	39589140	39613930	prkcq	protein kinase C%2C theta%2C transcript variant X1
1510	gene16216:106609272	39.1294	-0.49923	0.129233	-3.86301	0.000111997	0.00415319	ssa07	39589140	39613930	prkcq	protein kinase C%2C theta%2C transcript variant X4
1511	gene16216:106609272	39.1294	-0.49923	0.129233	-3.86301	0.000111997	0.00415319	ssa07	39589140	39609877	prkcq	protein kinase C%2C theta%2C transcript variant X2
1512	gene16217:106609271	80.7811	0.358182	0.126607	2.82908	0.00466824	0.0390719	ssa07	39627377	39672091	sfmbt2	Scm-like with four mbt domains 2%2C transcript variant X3
1513	gene16217:106609271	80.7811	0.358182	0.126607	2.82908	0.00466824	0.0390719	ssa07	39627377	39672091	sfmbt2	Scm-like with four mbt domains 2%2C transcript variant X1
1514	gene16217:106609271	80.7811	0.358182	0.126607	2.82908	0.00466824	0.0390719	ssa07	39627377	39672091	sfmbt2	Scm-like with four mbt domains 2%2C transcript variant X2
1515	gene16217:106609271	80.7811	0.358182	0.126607	2.82908	0.00466824	0.0390719	ssa07	39627377	39672091	sfmbt2	Scm-like with four mbt domains 2%2C transcript variant X4
1516	gene16219:106609270	441.957	-0.410287	0.0878824	-4.66858	3.03283e-06	0.00054123	ssa07	39677149	39696458	LOC106609270	transmembrane protein 110-like
1517	gene16230:106609337	87.8393	0.358364	0.129008	2.77784	0.00547212	0.0429832	ssa07	40654941	40764858	LOC106609337	CUGBP Elav-like family member 2%2C transcript variant X28
1518	gene16230:106609337	87.8393	0.358364	0.129008	2.77784	0.00547212	0.0429832	ssa07	40654942	40764858	LOC106609337	CUGBP Elav-like family member 2%2C transcript variant X22
1519	gene16230:106609337	87.8393	0.358364	0.129008	2.77784	0.00547212	0.0429832	ssa07	40654940	40764858	LOC106609337	CUGBP Elav-like family member 2%2C transcript variant X6
1520	gene16230:106609337	87.8393	0.358364	0.129008	2.77784	0.00547212	0.0429832	ssa07	40654941	40764858	LOC106609337	CUGBP Elav-like family member 2%2C transcript variant X26
1521	gene16230:106609337	87.8393	0.358364	0.129008	2.77784	0.00547212	0.0429832	ssa07	40666442	40764858	LOC106609337	CUGBP Elav-like family member 2%2C transcript variant X31
1522	gene16230:106609337	87.8393	0.358364	0.129008	2.77784	0.00547212	0.0429832	ssa07	40654940	40764858	LOC106609337	CUGBP Elav-like family member 2%2C transcript variant X3
1523	gene16230:106609337	87.8393	0.358364	0.129008	2.77784	0.00547212	0.0429832	ssa07	40666430	40764858	LOC106609337	CUGBP Elav-like family member 2%2C transcript variant X32
1524	gene16230:106609337	87.8393	0.358364	0.129008	2.77784	0.00547212	0.0429832	ssa07	40666352	40764858	LOC106609337	CUGBP Elav-like family member 2%2C transcript variant X24
1525	gene16230:106609337	87.8393	0.358364	0.129008	2.77784	0.00547212	0.0429832	ssa07	40654943	40764858	LOC106609337	CUGBP Elav-like family member 2%2C transcript variant X20
1526	gene16230:106609337	87.8393	0.358364	0.129008	2.77784	0.00547212	0.0429832	ssa07	40654942	40764858	LOC106609337	CUGBP Elav-like family member 2%2C transcript variant X21
1527	gene16230:106609337	87.8393	0.358364	0.129008	2.77784	0.00547212	0.0429832	ssa07	40654944	40764858	LOC106609337	CUGBP Elav-like family member 2%2C transcript variant X29
1528	gene16230:106609337	87.8393	0.358364	0.129008	2.77784	0.00547212	0.0429832	ssa07	40654942	40764858	LOC106609337	CUGBP Elav-like family member 2%2C transcript variant X18
1529	gene16230:106609337	87.8393	0.358364	0.129008	2.77784	0.00547212	0.0429832	ssa07	40654942	40764858	LOC106609337	CUGBP Elav-like family member 2%2C transcript variant X19
1530	gene16230:106609337	87.8393	0.358364	0.129008	2.77784	0.00547212	0.0429832	ssa07	40654943	40764858	LOC106609337	CUGBP Elav-like family member 2%2C transcript variant X30
1531	gene16230:106609337	87.8393	0.358364	0.129008	2.77784	0.00547212	0.0429832	ssa07	40654940	40764858	LOC106609337	CUGBP Elav-like family member 2%2C transcript variant X4
1532	gene16230:106609337	87.8393	0.358364	0.129008	2.77784	0.00547212	0.0429832	ssa07	40654940	40764858	LOC106609337	CUGBP Elav-like family member 2%2C transcript variant X15
1533	gene16230:106609337	87.8393	0.358364	0.129008	2.77784	0.00547212	0.0429832	ssa07	40593408	40764858	LOC106609337	CUGBP Elav-like family member 2%2C transcript variant X23
1534	gene16230:106609337	87.8393	0.358364	0.129008	2.77784	0.00547212	0.0429832	ssa07	40654940	40764858	LOC106609337	CUGBP Elav-like family member 2%2C transcript variant X1
1535	gene16230:106609337	87.8393	0.358364	0.129008	2.77784	0.00547212	0.0429832	ssa07	40654940	40760415	LOC106609337	CUGBP Elav-like family member 2%2C transcript variant X2
1536	gene16230:106609337	87.8393	0.358364	0.129008	2.77784	0.00547212	0.0429832	ssa07	40654939	40764858	LOC106609337	CUGBP Elav-like family member 2%2C transcript variant X13
1537	gene16230:106609337	87.8393	0.358364	0.129008	2.77784	0.00547212	0.0429832	ssa07	40654939	40764858	LOC106609337	CUGBP Elav-like family member 2%2C transcript variant X14
1538	gene16230:106609337	87.8393	0.358364	0.129008	2.77784	0.00547212	0.0429832	ssa07	40654942	40764858	LOC106609337	CUGBP Elav-like family member 2%2C transcript variant X27
1539	gene16230:106609337	87.8393	0.358364	0.129008	2.77784	0.00547212	0.0429832	ssa07	40654939	40764858	LOC106609337	CUGBP Elav-like family member 2%2C transcript variant X16
1540	gene16230:106609337	87.8393	0.358364	0.129008	2.77784	0.00547212	0.0429832	ssa07	40654941	40764858	LOC106609337	CUGBP Elav-like family member 2%2C transcript variant X11
1541	gene16230:106609337	87.8393	0.358364	0.129008	2.77784	0.00547212	0.0429832	ssa07	40654939	40764858	LOC106609337	CUGBP Elav-like family member 2%2C transcript variant X7
1542	gene16230:106609337	87.8393	0.358364	0.129008	2.77784	0.00547212	0.0429832	ssa07	40654940	40764858	LOC106609337	CUGBP Elav-like family member 2%2C transcript variant X9
1543	gene16230:106609337	87.8393	0.358364	0.129008	2.77784	0.00547212	0.0429832	ssa07	40654941	40764858	LOC106609337	CUGBP Elav-like family member 2%2C transcript variant X17
1544	gene16230:106609337	87.8393	0.358364	0.129008	2.77784	0.00547212	0.0429832	ssa07	40654940	40764858	LOC106609337	CUGBP Elav-like family member 2%2C transcript variant X10
1545	gene16230:106609337	87.8393	0.358364	0.129008	2.77784	0.00547212	0.0429832	ssa07	40654939	40764858	LOC106609337	CUGBP Elav-like family member 2%2C transcript variant X12
1546	gene16230:106609337	87.8393	0.358364	0.129008	2.77784	0.00547212	0.0429832	ssa07	40654941	40764858	LOC106609337	CUGBP Elav-like family member 2%2C transcript variant X8
1547	gene16230:106609337	87.8393	0.358364	0.129008	2.77784	0.00547212	0.0429832	ssa07	40654941	40764858	LOC106609337	CUGBP Elav-like family member 2%2C transcript variant X25
1548	gene16230:106609337	87.8393	0.358364	0.129008	2.77784	0.00547212	0.0429832	ssa07	40654941	40764858	LOC106609337	CUGBP Elav-like family member 2%2C transcript variant X5
1549	gene16231:106609340	398.885	-0.30719	0.104695	-2.93413	0.0033448	0.0319363	ssa07	40812412	40850217	LOC106609340	USP6 N-terminal-like protein%2C transcript variant X1
1550	gene16231:106609340	398.885	-0.30719	0.104695	-2.93413	0.0033448	0.0319363	ssa07	40784350	40850217	LOC106609340	USP6 N-terminal-like protein%2C transcript variant X3
1551	gene16231:106609340	398.885	-0.30719	0.104695	-2.93413	0.0033448	0.0319363	ssa07	40821990	40850217	LOC106609340	USP6 N-terminal-like protein%2C transcript variant X2
1552	gene16233:106609341	94.8971	0.345184	0.124949	2.76261	0.00573408	0.0442395	ssa07	40859239	40893603	LOC106609341	solute carrier family 41 member 2-like%2C transcript variant X1
1553	gene16233:106609341	94.8971	0.345184	0.124949	2.76261	0.00573408	0.0442395	ssa07	40859239	40893603	LOC106609341	solute carrier family 41 member 2-like%2C transcript variant X2
1554	gene16234:106609345	36.5594	0.538826	0.178459	3.01933	0.00253333	0.0271545	ssa07	40906651	40977549	LOC106609345	carbohydrate sulfotransferase 11-like%2C transcript variant X1
1555	gene16234:106609345	36.5594	0.538826	0.178459	3.01933	0.00253333	0.0271545	ssa07	40906651	40920083	LOC106609345	carbohydrate sulfotransferase 11-like%2C transcript variant X2
1556	gene16247:106609353	475.054	-0.200774	0.0616644	-3.25592	0.00113027	0.0166501	ssa07	41234264	41247114	LOC106609353	rab GDP dissociation inhibitor beta-like
1557	gene1628:106610913	194.193	0.406155	0.0951768	4.26737	1.97792e-05	0.00161635	ssa01	83403884	83459128	ppm1b	protein phosphatase%2C Mg2+/Mn2+ dependent%2C 1B%2C transcript variant X2
1558	gene1628:106610913	194.193	0.406155	0.0951768	4.26737	1.97792e-05	0.00161635	ssa01	83404134	83459128	ppm1b	protein phosphatase%2C Mg2+/Mn2+ dependent%2C 1B%2C transcript variant X1
1559	gene1628:106610913	194.193	0.406155	0.0951768	4.26737	1.97792e-05	0.00161635	ssa01	83404132	83459128	ppm1b	protein phosphatase%2C Mg2+/Mn2+ dependent%2C 1B%2C transcript variant X4
1560	gene1628:106610913	194.193	0.406155	0.0951768	4.26737	1.97792e-05	0.00161635	ssa01	83404133	83459128	ppm1b	protein phosphatase%2C Mg2+/Mn2+ dependent%2C 1B%2C transcript variant X5
1561	gene1628:106610913	194.193	0.406155	0.0951768	4.26737	1.97792e-05	0.00161635	ssa01	83424200	83459128	ppm1b	protein phosphatase%2C Mg2+/Mn2+ dependent%2C 1B%2C transcript variant X3
1562	gene16282:100195486	339.785	-0.351327	0.0908765	-3.86598	0.000110642	0.00413696	ssa07	42264806	42276379	ccnd2	G1/S-specific cyclin-D2
1563	gene16299:106609452	605.38	-0.252177	0.0697148	-3.61727	0.000297732	0.00736002	ssa07	42492812	42507505	LOC106609452	cholinephosphotransferase 1-like
1564	gene16300:106609432	258.62	-0.281355	0.0856631	-3.28444	0.00102185	0.0157127	ssa07	42507541	42525355	LOC106609432	N-acetylglucosamine-1-phosphotransferase subunits alpha/beta-like
1565	gene16302:100195265	441.133	-0.293725	0.0859789	-3.41624	0.000634916	0.0119629	ssa07	42536848	42540982	ccd53	Coiled-coil domain-containing protein 53
1566	gene16346:106609416	399.596	0.431707	0.103906	4.15477	3.25613e-05	0.0020963	ssa07	43393135	43483793	LOC106609416	PRKC apoptosis WT1 regulator protein-like%2C transcript variant X1
1567	gene16346:106609416	399.596	0.431707	0.103906	4.15477	3.25613e-05	0.0020963	ssa07	43393135	43483793	LOC106609416	PRKC apoptosis WT1 regulator protein-like%2C transcript variant X2
1568	gene16355:100195596	4668.55	-0.33084	0.118829	-2.78417	0.00536642	0.042529	ssa07	43957194	43961562	rs16	40S ribosomal protein S16
1569	gene16355:100195596	4668.55	-0.33084	0.118829	-2.78417	0.00536642	0.042529	ssa07	43956993	43961562	rs16	40S ribosomal protein S16%2C transcript variant X1
1570	gene16362:106609405	1459.56	-0.423056	0.122639	-3.44961	0.00056139	0.011073	ssa07	44350273	44351807	LOC106609405	protein LLP homolog
1571	gene16368:106609484	12.4767	-0.871307	0.299022	-2.91385	0.00356997	0.0333273	ssa07	44461772	44464463	LOC106609484	nuclear factor 7%2C ovary-like%2C transcript variant X1
1572	gene16368:106609484	12.4767	-0.871307	0.299022	-2.91385	0.00356997	0.0333273	ssa07	44461774	44464463	LOC106609484	nuclear factor 7%2C ovary-like%2C transcript variant X2
1573	gene16371:106609400	2150.01	-0.267662	0.0834561	-3.20722	0.00134024	0.018378	ssa07	44509231	44512395	LOC106609400	NADH dehydrogenase [ubiquinone] 1 beta subcomplex subunit 2%2C mitochondrial-like%2C transcript variant X2
1574	gene16371:106609400	2150.01	-0.267662	0.0834561	-3.20722	0.00134024	0.018378	ssa07	44509398	44512395	LOC106609400	NADH dehydrogenase [ubiquinone] 1 beta subcomplex subunit 2%2C mitochondrial-like%2C transcript variant X1
1575	gene16371:106609400	2150.01	-0.267662	0.0834561	-3.20722	0.00134024	0.018378	ssa07	44509237	44512395	LOC106609400	NADH dehydrogenase [ubiquinone] 1 beta subcomplex subunit 2%2C mitochondrial-like%2C transcript variant X3
1576	gene16390:106609502	316.347	-0.520831	0.168934	-3.08304	0.00204896	0.0237804	ssa07	45441238	45475593	LOC106609502	tubby-related protein 3-like%2C transcript variant X4
1577	gene16390:106609502	316.347	-0.520831	0.168934	-3.08304	0.00204896	0.0237804	ssa07	45441238	45457832	LOC106609502	tubby-related protein 3-like%2C transcript variant X5
1578	gene16390:106609502	316.347	-0.520831	0.168934	-3.08304	0.00204896	0.0237804	ssa07	45441238	45475881	LOC106609502	tubby-related protein 3-like%2C transcript variant X3
1579	gene16390:106609502	316.347	-0.520831	0.168934	-3.08304	0.00204896	0.0237804	ssa07	45441238	45475633	LOC106609502	tubby-related protein 3-like%2C transcript variant X2
1580	gene16390:106609502	316.347	-0.520831	0.168934	-3.08304	0.00204896	0.0237804	ssa07	45441238	45475631	LOC106609502	tubby-related protein 3-like%2C transcript variant X1
1581	gene16394:106609506	229.356	-0.246528	0.0874344	-2.81958	0.00480867	0.039799	ssa07	45495072	45498938	LOC106609506	peroxisome assembly protein 26-like
1582	gene1640:106611067	350.208	-0.483057	0.12285	-3.93209	8.42099e-05	0.00351823	ssa01	84637976	84648121	LOC106611067	ankyrin repeat domain-containing protein 1-like
1583	gene16428:106609536	74.6288	-0.345735	0.123292	-2.80419	0.00504432	0.0409495	ssa07	46198788	46208464	LOC106609536	globoside alpha-1%2C3-N-acetylgalactosaminyltransferase 1-like%2C transcript variant X1
1584	gene16428:106609536	74.6288	-0.345735	0.123292	-2.80419	0.00504432	0.0409495	ssa07	46198788	46207152	LOC106609536	globoside alpha-1%2C3-N-acetylgalactosaminyltransferase 1-like%2C transcript variant X2
1585	gene16447:106609561	645.127	-0.328624	0.0942109	-3.48818	0.000486324	0.0101049	ssa07	46633116	46671597	LOC106609561	protein kinase C and casein kinase substrate in neurons protein 2-like
1586	gene16451:106609564	221.424	0.236984	0.085171	2.78245	0.005395	0.0426727	ssa07	46703519	46754821	LOC106609564	UHRF1-binding protein 1-like%2C transcript variant X6
1587	gene16451:106609564	221.424	0.236984	0.085171	2.78245	0.005395	0.0426727	ssa07	46719141	46754821	LOC106609564	UHRF1-binding protein 1-like%2C transcript variant X5
1588	gene16451:106609564	221.424	0.236984	0.085171	2.78245	0.005395	0.0426727	ssa07	46703341	46754821	LOC106609564	UHRF1-binding protein 1-like%2C transcript variant X2
1589	gene16451:106609564	221.424	0.236984	0.085171	2.78245	0.005395	0.0426727	ssa07	46703341	46754821	LOC106609564	UHRF1-binding protein 1-like%2C transcript variant X4
1590	gene16451:106609564	221.424	0.236984	0.085171	2.78245	0.005395	0.0426727	ssa07	46703518	46754821	LOC106609564	UHRF1-binding protein 1-like%2C transcript variant X3
1591	gene16451:106609564	221.424	0.236984	0.085171	2.78245	0.005395	0.0426727	ssa07	46703341	46754821	LOC106609564	UHRF1-binding protein 1-like%2C transcript variant X1
1592	gene16457:106609569	386.093	0.467094	0.111877	4.17509	2.97874e-05	0.00199695	ssa07	47194108	47199722	LOC106609569	protein BTG1-like
1593	gene16458:106609570	1453.21	-0.292977	0.102446	-2.85982	0.00423885	0.0368403	ssa07	47264287	47269182	LOC106609570	troponin I%2C slow skeletal muscle-like
1594	gene16534:106609608	17.9354	0.755877	0.236337	3.1983	0.00138241	0.0187029	ssa07	49077708	49257348	LOC106609608	exocyst complex component 4-like%2C transcript variant X1
1595	gene16534:106609608	17.9354	0.755877	0.236337	3.1983	0.00138241	0.0187029	ssa07	49077708	49257348	LOC106609608	exocyst complex component 4-like%2C transcript variant X2
1596	gene16556:106609641	5.89238	1.14879	0.390531	2.9416	0.00326521	0.0314164	ssa07	50493269	50679636	LOC106609641	protein piccolo-like
1597	gene16563:106609647	23.3179	0.745788	0.204603	3.64505	0.000267339	0.00698174	ssa07	50860797	50872902	LOC106609647	staphylococcal nuclease domain-containing protein 1-like
1598	gene1658:106611148	24.0887	0.789057	0.180119	4.38076	1.18268e-05	0.00118192	ssa01	86131208	86768568	LOC106611148	neurexin-1a%2C transcript variant X10
1599	gene1658:106611148	24.0887	0.789057	0.180119	4.38076	1.18268e-05	0.00118192	ssa01	86268693	86768568	LOC106611148	neurexin-1a%2C transcript variant X9
1600	gene1658:106611148	24.0887	0.789057	0.180119	4.38076	1.18268e-05	0.00118192	ssa01	86131208	86768568	LOC106611148	neurexin-1a%2C transcript variant X2
1601	gene1658:106611148	24.0887	0.789057	0.180119	4.38076	1.18268e-05	0.00118192	ssa01	86131208	86768568	LOC106611148	neurexin-1a%2C transcript variant X6
1602	gene1658:106611148	24.0887	0.789057	0.180119	4.38076	1.18268e-05	0.00118192	ssa01	86131208	86768568	LOC106611148	neurexin-1a%2C transcript variant X4
1603	gene1658:106611148	24.0887	0.789057	0.180119	4.38076	1.18268e-05	0.00118192	ssa01	86131208	86768568	LOC106611148	neurexin-1a%2C transcript variant X7
1604	gene1658:106611148	24.0887	0.789057	0.180119	4.38076	1.18268e-05	0.00118192	ssa01	86131208	86768568	LOC106611148	neurexin-1a%2C transcript variant X3
1605	gene1658:106611148	24.0887	0.789057	0.180119	4.38076	1.18268e-05	0.00118192	ssa01	86131208	86768568	LOC106611148	neurexin-1a%2C transcript variant X5
1606	gene1658:106611148	24.0887	0.789057	0.180119	4.38076	1.18268e-05	0.00118192	ssa01	86131208	86768568	LOC106611148	neurexin-1a%2C transcript variant X1
1607	gene1658:106611148	24.0887	0.789057	0.180119	4.38076	1.18268e-05	0.00118192	ssa01	86131208	86768568	LOC106611148	neurexin-1a%2C transcript variant X8
1608	gene1660:106611219	773.458	-0.339394	0.0861003	-3.94184	8.08591e-05	0.00342192	ssa01	87449896	87461727	LOC106611219	endoplasmic reticulum lectin 1-like%2C transcript variant X2
1609	gene1660:106611219	773.458	-0.339394	0.0861003	-3.94184	8.08591e-05	0.00342192	ssa01	87449894	87461727	LOC106611219	endoplasmic reticulum lectin 1-like%2C transcript variant X1
1610	gene1660:106611219	773.458	-0.339394	0.0861003	-3.94184	8.08591e-05	0.00342192	ssa01	87449608	87461727	LOC106611219	endoplasmic reticulum lectin 1-like%2C transcript variant X3
1611	gene16625:100195331	8.80878	-0.84602	0.283401	-2.98524	0.00283359	0.028935	ssa07	52462899	52464166	irk8	ATP-sensitive inward rectifier potassium channel 8
1612	gene16630:106609717	300.122	-0.514197	0.120518	-4.26656	1.98506e-05	0.00161722	ssa07	52701733	52704774	LOC106609717	DNA-(apurinic or apyrimidinic site) lyase-like
1613	gene16636:100380621	151.83	-0.324059	0.107291	-3.02038	0.00252457	0.0271014	ssa07	52825237	52829549	gcp	Probable O-sialoglycoprotein endopeptidase%2C transcript variant X2
1614	gene16636:100380621	151.83	-0.324059	0.107291	-3.02038	0.00252457	0.0271014	ssa07	52825267	52829358	gcp	Probable O-sialoglycoprotein endopeptidase
1615	gene16636:100380621	151.83	-0.324059	0.107291	-3.02038	0.00252457	0.0271014	ssa07	52825237	52829470	gcp	Probable O-sialoglycoprotein endopeptidase%2C transcript variant X1
1616	gene16647:106609732	22.1911	1.02496	0.240012	4.27048	1.95055e-05	0.00161231	ssa07	53150373	53191184	LOC106609732	contactin-1a-like
1617	gene1665:106611257	2632.36	-0.315514	0.0901788	-3.49876	0.000467435	0.00980828	ssa01	88033277	88081676	LOC106611257	thrombospondin-2-like%2C transcript variant X1
1618	gene1665:106611257	2632.36	-0.315514	0.0901788	-3.49876	0.000467435	0.00980828	ssa01	88033277	88081676	LOC106611257	thrombospondin-2-like%2C transcript variant X4
1619	gene1665:106611257	2632.36	-0.315514	0.0901788	-3.49876	0.000467435	0.00980828	ssa01	88033277	88081676	LOC106611257	thrombospondin-2-like%2C transcript variant X5
1620	gene1665:106611257	2632.36	-0.315514	0.0901788	-3.49876	0.000467435	0.00980828	ssa01	88033277	88081676	LOC106611257	thrombospondin-2-like%2C transcript variant X3
1621	gene1665:106611257	2632.36	-0.315514	0.0901788	-3.49876	0.000467435	0.00980828	ssa01	88033097	88081676	LOC106611257	thrombospondin-2-like%2C transcript variant X2
1622	gene16654:106609740	88.1683	0.462759	0.142541	3.24649	0.00116838	0.017011	ssa07	53295232	53414383	LOC106609740	neuron navigator 3-like%2C transcript variant X1
1623	gene16654:106609740	88.1683	0.462759	0.142541	3.24649	0.00116838	0.017011	ssa07	53344463	53414383	LOC106609740	neuron navigator 3-like%2C transcript variant X10
1624	gene16654:106609740	88.1683	0.462759	0.142541	3.24649	0.00116838	0.017011	ssa07	53295232	53414383	LOC106609740	neuron navigator 3-like%2C transcript variant X5
1625	gene16654:106609740	88.1683	0.462759	0.142541	3.24649	0.00116838	0.017011	ssa07	53344462	53414383	LOC106609740	neuron navigator 3-like%2C transcript variant X13
1626	gene16654:106609740	88.1683	0.462759	0.142541	3.24649	0.00116838	0.017011	ssa07	53344464	53414383	LOC106609740	neuron navigator 3-like%2C transcript variant X11
1627	gene16654:106609740	88.1683	0.462759	0.142541	3.24649	0.00116838	0.017011	ssa07	53295232	53414383	LOC106609740	neuron navigator 3-like%2C transcript variant X4
1628	gene16654:106609740	88.1683	0.462759	0.142541	3.24649	0.00116838	0.017011	ssa07	53344463	53414383	LOC106609740	neuron navigator 3-like%2C transcript variant X16
1629	gene16654:106609740	88.1683	0.462759	0.142541	3.24649	0.00116838	0.017011	ssa07	53295232	53414383	LOC106609740	neuron navigator 3-like%2C transcript variant X2
1630	gene16654:106609740	88.1683	0.462759	0.142541	3.24649	0.00116838	0.017011	ssa07	53344464	53414383	LOC106609740	neuron navigator 3-like%2C transcript variant X15
1631	gene16654:106609740	88.1683	0.462759	0.142541	3.24649	0.00116838	0.017011	ssa07	53295232	53414383	LOC106609740	neuron navigator 3-like%2C transcript variant X7
1632	gene16654:106609740	88.1683	0.462759	0.142541	3.24649	0.00116838	0.017011	ssa07	53295232	53414383	LOC106609740	neuron navigator 3-like%2C transcript variant X9
1633	gene16654:106609740	88.1683	0.462759	0.142541	3.24649	0.00116838	0.017011	ssa07	53344463	53414383	LOC106609740	neuron navigator 3-like%2C transcript variant X12
1634	gene16654:106609740	88.1683	0.462759	0.142541	3.24649	0.00116838	0.017011	ssa07	53295232	53414383	LOC106609740	neuron navigator 3-like%2C transcript variant X8
1635	gene16654:106609740	88.1683	0.462759	0.142541	3.24649	0.00116838	0.017011	ssa07	53344461	53414383	LOC106609740	neuron navigator 3-like%2C transcript variant X14
1636	gene16654:106609740	88.1683	0.462759	0.142541	3.24649	0.00116838	0.017011	ssa07	53295232	53414383	LOC106609740	neuron navigator 3-like%2C transcript variant X6
1637	gene16654:106609740	88.1683	0.462759	0.142541	3.24649	0.00116838	0.017011	ssa07	53295232	53414383	LOC106609740	neuron navigator 3-like%2C transcript variant X3
1638	gene1666:106611248	177.185	-0.291828	0.103266	-2.82597	0.00471379	0.0392982	ssa01	88118469	88151390	LOC106611248	mitogen-activated protein kinase kinase kinase 4-like%2C transcript variant X2
1639	gene1666:106611248	177.185	-0.291828	0.103266	-2.82597	0.00471379	0.0392982	ssa01	88118469	88151390	LOC106611248	mitogen-activated protein kinase kinase kinase 4-like%2C transcript variant X1
1640	gene16662:100195783	1698.05	-0.456848	0.134968	-3.38487	0.000712114	0.0127459	ssa07	54210404	54213067	fel	Fish-egg lectin
1641	gene16678:106609765	102.16	-0.408181	0.0988544	-4.12912	3.64162e-05	0.00221908	ssa07	54760916	54764821	LOC106609765	pleckstrin homology-like domain family A member 1
1642	gene16697:106609776	465.488	-0.51598	0.126339	-4.08408	4.4251e-05	0.0024194	ssa07	55331670	55365516	LOC106609776	smoothened homolog
1643	gene16724:106609810	35.0796	0.676041	0.176471	3.83089	0.000127682	0.00448302	ssa07	56804327	56843314	ptprr	protein tyrosine phosphatase%2C receptor type%2C R
1644	gene1673:106613304	409.292	-0.194311	0.0661052	-2.93942	0.0032883	0.0315414	ssa01	88871255	88939220	LOC106613304	disks large homolog 5-like%2C transcript variant X1
1645	gene1673:106613304	409.292	-0.194311	0.0661052	-2.93942	0.0032883	0.0315414	ssa01	88871255	88939220	LOC106613304	disks large homolog 5-like%2C transcript variant X5
1646	gene1673:106613304	409.292	-0.194311	0.0661052	-2.93942	0.0032883	0.0315414	ssa01	88871255	88939220	LOC106613304	disks large homolog 5-like%2C transcript variant X7
1647	gene1673:106613304	409.292	-0.194311	0.0661052	-2.93942	0.0032883	0.0315414	ssa01	88871255	88939220	LOC106613304	disks large homolog 5-like%2C transcript variant X3
1648	gene1673:106613304	409.292	-0.194311	0.0661052	-2.93942	0.0032883	0.0315414	ssa01	88871255	88939220	LOC106613304	disks large homolog 5-like%2C transcript variant X6
1649	gene1673:106613304	409.292	-0.194311	0.0661052	-2.93942	0.0032883	0.0315414	ssa01	88878172	88939220	LOC106613304	disks large homolog 5-like%2C transcript variant X10
1650	gene1673:106613304	409.292	-0.194311	0.0661052	-2.93942	0.0032883	0.0315414	ssa01	88876606	88939220	LOC106613304	disks large homolog 5-like%2C transcript variant X9
1651	gene1673:106613304	409.292	-0.194311	0.0661052	-2.93942	0.0032883	0.0315414	ssa01	88871255	88939220	LOC106613304	disks large homolog 5-like%2C transcript variant X8
1652	gene1673:106613304	409.292	-0.194311	0.0661052	-2.93942	0.0032883	0.0315414	ssa01	88871255	88939220	LOC106613304	disks large homolog 5-like%2C transcript variant X4
1653	gene1673:106613304	409.292	-0.194311	0.0661052	-2.93942	0.0032883	0.0315414	ssa01	88871255	88939220	LOC106613304	disks large homolog 5-like%2C transcript variant X2
1654	gene16757:106609839	145.504	0.346207	0.112674	3.07264	0.00212174	0.0243238	ssa07	58017658	58018050	LOC106609839	ras-related protein Rab-21
1655	gene1676:106613273	243.512	0.20542	0.0692348	2.967	0.00300717	0.0299964	ssa01	89024635	89048872	LOC106613273	AN1-type zinc finger protein 4-like%2C transcript variant X2
1656	gene1676:106613273	243.512	0.20542	0.0692348	2.967	0.00300717	0.0299964	ssa01	89024538	89048872	LOC106613273	AN1-type zinc finger protein 4-like%2C transcript variant X1
1657	gene1676:106613273	243.512	0.20542	0.0692348	2.967	0.00300717	0.0299964	ssa01	89024583	89048872	LOC106613273	AN1-type zinc finger protein 4-like%2C transcript variant X3
1658	gene16760:106609843	9.07191	0.939074	0.314974	2.98143	0.00286903	0.0291856	ssa07	58193171	58197541	LOC106609843	LIM domain only protein 3%2C transcript variant X1
1659	gene16760:106609843	9.07191	0.939074	0.314974	2.98143	0.00286903	0.0291856	ssa07	58187136	58197541	LOC106609843	LIM domain only protein 3%2C transcript variant X3
1660	gene16760:106609843	9.07191	0.939074	0.314974	2.98143	0.00286903	0.0291856	ssa07	58196243	58197541	LOC106609843	LIM domain only protein 3%2C transcript variant X2
1661	gene16764:106609847	41.1912	0.480475	0.167861	2.86233	0.00420537	0.0367053	ssa07	58296305	58301036	LOC106609847	protein lifeguard 4-like
1662	gene1677:106613192	32.4224	0.470842	0.152092	3.09577	0.00196306	0.0230403	ssa01	89086006	89207389	LOC106613192	E3 ubiquitin-protein ligase MARCH8-like%2C transcript variant X3
1663	gene1677:106613192	32.4224	0.470842	0.152092	3.09577	0.00196306	0.0230403	ssa01	89085978	89207389	LOC106613192	E3 ubiquitin-protein ligase MARCH8-like%2C transcript variant X1
1664	gene1677:106613192	32.4224	0.470842	0.152092	3.09577	0.00196306	0.0230403	ssa01	89085978	89207389	LOC106613192	E3 ubiquitin-protein ligase MARCH8-like%2C transcript variant X5
1665	gene1677:106613192	32.4224	0.470842	0.152092	3.09577	0.00196306	0.0230403	ssa01	89085978	89207389	LOC106613192	E3 ubiquitin-protein ligase MARCH8-like%2C transcript variant X4
1666	gene1677:106613192	32.4224	0.470842	0.152092	3.09577	0.00196306	0.0230403	ssa01	89160256	89207389	LOC106613192	E3 ubiquitin-protein ligase MARCH8-like%2C transcript variant X7
1667	gene1677:106613192	32.4224	0.470842	0.152092	3.09577	0.00196306	0.0230403	ssa01	89085978	89207388	LOC106613192	E3 ubiquitin-protein ligase MARCH8-like%2C transcript variant X6
1668	gene1677:106613192	32.4224	0.470842	0.152092	3.09577	0.00196306	0.0230403	ssa01	89086000	89207389	LOC106613192	E3 ubiquitin-protein ligase MARCH8-like%2C transcript variant X2
1669	gene1678:106613187	72.8353	0.431607	0.145744	2.9614	0.00306249	0.0303081	ssa01	89213133	89225670	LOC106613187	arachidonate 5-lipoxygenase-like
1670	gene16790:106609880	839.39	0.161897	0.0547502	2.95701	0.00310638	0.030507	ssa08	344060	380535	LOC106609880	ATP-binding cassette sub-family A member 1-like%2C transcript variant X2
1671	gene16790:106609880	839.39	0.161897	0.0547502	2.95701	0.00310638	0.030507	ssa08	344060	380535	LOC106609880	ATP-binding cassette sub-family A member 1-like%2C transcript variant X3
1672	gene16790:106609880	839.39	0.161897	0.0547502	2.95701	0.00310638	0.030507	ssa08	344059	380535	LOC106609880	ATP-binding cassette sub-family A member 1-like%2C transcript variant X1
1673	gene16795:106609884	325.896	-0.263328	0.0679505	-3.8753	0.000106495	0.00403903	ssa08	462463	480802	LOC106609884	tropomodulin-1-like%2C transcript variant X4
1674	gene16795:106609884	325.896	-0.263328	0.0679505	-3.8753	0.000106495	0.00403903	ssa08	462480	480802	LOC106609884	tropomodulin-1-like%2C transcript variant X3
1675	gene16795:106609884	325.896	-0.263328	0.0679505	-3.8753	0.000106495	0.00403903	ssa08	462463	480802	LOC106609884	tropomodulin-1-like%2C transcript variant X1
1676	gene16795:106609884	325.896	-0.263328	0.0679505	-3.8753	0.000106495	0.00403903	ssa08	465476	480802	LOC106609884	tropomodulin-1-like%2C transcript variant X5
1677	gene16795:106609884	325.896	-0.263328	0.0679505	-3.8753	0.000106495	0.00403903	ssa08	463942	480802	LOC106609884	tropomodulin-1-like%2C transcript variant X2
1678	gene16798:106609887	1202.6	-0.396845	0.10366	-3.82834	0.000129009	0.00450163	ssa08	546271	556192	LOC106609887	clathrin light chain A-like%2C transcript variant X1
1679	gene16798:106609887	1202.6	-0.396845	0.10366	-3.82834	0.000129009	0.00450163	ssa08	546271	556191	LOC106609887	clathrin light chain A-like%2C transcript variant X2
1680	gene16798:106609887	1202.6	-0.396845	0.10366	-3.82834	0.000129009	0.00450163	ssa08	546271	556190	LOC106609887	clathrin light chain A-like%2C transcript variant X3
1681	gene16806:106609893	726.846	0.200409	0.062142	3.22501	0.00125968	0.0177279	ssa08	675050	694029	LOC106609893	membrane-spanning 4-domains subfamily A member 12-like%2C transcript variant X1
1682	gene16806:106609893	726.846	0.200409	0.062142	3.22501	0.00125968	0.0177279	ssa08	675123	694029	LOC106609893	membrane-spanning 4-domains subfamily A member 12-like%2C transcript variant X3
1683	gene16806:106609893	726.846	0.200409	0.062142	3.22501	0.00125968	0.0177279	ssa08	675124	694029	LOC106609893	membrane-spanning 4-domains subfamily A member 12-like%2C transcript variant X2
1684	gene16808:106609894	1603.95	-0.345861	0.0935704	-3.69627	0.00021879	0.00618819	ssa08	706132	726723	LOC106609894	DNA-directed RNA polymerase II subunit 1-like
1685	gene16826:106609866	169.599	0.374568	0.131391	2.8508	0.00436097	0.037419	ssa08	1139319	1172023	LOC106609866	palmitoyltransferase ZDHHC5-like
1686	gene16854:106609941	266.389	0.233996	0.0726013	3.22303	0.00126842	0.0177702	ssa08	2852738	2900681	LOC106609941	pericentriolar material 1 protein-like%2C transcript variant X7
1687	gene16854:106609941	266.389	0.233996	0.0726013	3.22303	0.00126842	0.0177702	ssa08	2852738	2900681	LOC106609941	pericentriolar material 1 protein-like%2C transcript variant X5
1688	gene16854:106609941	266.389	0.233996	0.0726013	3.22303	0.00126842	0.0177702	ssa08	2852738	2901232	LOC106609941	pericentriolar material 1 protein-like%2C transcript variant X2
1689	gene16854:106609941	266.389	0.233996	0.0726013	3.22303	0.00126842	0.0177702	ssa08	2852738	2899712	LOC106609941	pericentriolar material 1 protein-like%2C transcript variant X3
1690	gene16854:106609941	266.389	0.233996	0.0726013	3.22303	0.00126842	0.0177702	ssa08	2852738	2900681	LOC106609941	pericentriolar material 1 protein-like%2C transcript variant X1
1691	gene16854:106609941	266.389	0.233996	0.0726013	3.22303	0.00126842	0.0177702	ssa08	2852738	2900681	LOC106609941	pericentriolar material 1 protein-like%2C transcript variant X6
1692	gene16854:106609941	266.389	0.233996	0.0726013	3.22303	0.00126842	0.0177702	ssa08	2852738	2900681	LOC106609941	pericentriolar material 1 protein-like%2C transcript variant X4
1693	gene16854:106609941	266.389	0.233996	0.0726013	3.22303	0.00126842	0.0177702	ssa08	2852738	2900681	LOC106609941	pericentriolar material 1 protein-like%2C transcript variant X8
1694	gene16865:106609952	12.7645	0.959083	0.314991	3.04479	0.00232844	0.0258396	ssa08	3117411	3123453	LOC106609952	mucin-2-like
1695	gene16891:106609974	751.65	-0.578583	0.145973	-3.96362	7.38222e-05	0.00325095	ssa08	3875956	3917079	LOC106609974	programmed cell death protein 4-like%2C transcript variant X1
1696	gene16891:106609974	751.65	-0.578583	0.145973	-3.96362	7.38222e-05	0.00325095	ssa08	3891216	3917079	LOC106609974	programmed cell death protein 4-like%2C transcript variant X2
1697	gene16901:106609934	36.9766	0.409004	0.146551	2.79087	0.0052567	0.0420132	ssa08	4657342	5412363	LOC106609934	catenin alpha-2-like
1698	gene16921:106609991	16.7947	1.17765	0.28818	4.08653	4.37882e-05	0.00240617	ssa08	6697419	6725025	LOC106609991	SPARC-like protein 1
1699	gene16925:106610014	99.7749	-0.411646	0.146845	-2.80327	0.00505877	0.0410027	ssa08	6824633	6835767	LOC106610014	synaptopodin-2-like%2C transcript variant X1
1700	gene16925:106610014	99.7749	-0.411646	0.146845	-2.80327	0.00505877	0.0410027	ssa08	6824633	6835767	LOC106610014	synaptopodin-2-like%2C transcript variant X2
1701	gene16983:106610115	5.85103	-1.30227	0.378893	-3.43705	0.000588095	0.0114017	ssa08	8390911	8392999	LOC106610115	zinc finger protein 287-like
1702	gene17014:106610112	18.512	-0.66013	0.229697	-2.87391	0.00405419	0.0359341	ssa08	9001189	9009335	LOC106610112	zinc finger and BTB domain-containing protein 20-like
1703	gene17069:106610164	1668.47	-0.345907	0.110564	-3.12857	0.00175656	0.0215587	ssa08	11201625	11249262	LOC106610164	neuronal membrane glycoprotein M6-a-like%2C transcript variant X3
1704	gene17069:106610164	1668.47	-0.345907	0.110564	-3.12857	0.00175656	0.0215587	ssa08	11201631	11251902	LOC106610164	neuronal membrane glycoprotein M6-a-like%2C transcript variant X1
1705	gene17069:106610164	1668.47	-0.345907	0.110564	-3.12857	0.00175656	0.0215587	ssa08	11179295	11251902	LOC106610164	neuronal membrane glycoprotein M6-a-like%2C transcript variant X2
1706	gene17084:100196870	194.784	-0.333156	0.0968597	-3.43957	0.00058263	0.0113192	ssa08	12670653	12671830	xtp3a	XTP3-transactivated gene A protein homolog
1707	gene17092:106610185	214.483	-0.423247	0.108449	-3.90273	9.51135e-05	0.00379199	ssa08	12981455	12990726	LOC106610185	protein mab-21-like 2%2C transcript variant X2
1708	gene17092:106610185	214.483	-0.423247	0.108449	-3.90273	9.51135e-05	0.00379199	ssa08	12981455	12983559	LOC106610185	protein mab-21-like 2%2C transcript variant X1
1709	gene17097:106610191	461.718	-0.367814	0.13103	-2.80709	0.00499917	0.0406926	ssa08	13274838	13320154	LOC106610191	rho GTPase-activating protein 10-like
1710	gene17117:106610211	17.5824	0.882862	0.219211	4.02746	5.63833e-05	0.00277056	ssa08	14210798	14241459	LOC106610211	mucin-5AC-like
1711	gene17128:106610231	491.404	-0.48042	0.129916	-3.69793	0.000217366	0.00618528	ssa08	14815413	14817384	LOC106610231	U6 snRNA-associated Sm-like protein LSm6%2C transcript variant X2
1712	gene17128:106610231	491.404	-0.48042	0.129916	-3.69793	0.000217366	0.00618528	ssa08	14815519	14817384	LOC106610231	U6 snRNA-associated Sm-like protein LSm6%2C transcript variant X3
1713	gene17128:106610231	491.404	-0.48042	0.129916	-3.69793	0.000217366	0.00618528	ssa08	14815402	14817384	LOC106610231	U6 snRNA-associated Sm-like protein LSm6%2C transcript variant X1
1714	gene17131:106610222	64.1152	-0.663988	0.135621	-4.89592	9.78454e-07	0.000265322	ssa08	15074955	15084724	LOC106610222	putative protein arginine N-methyltransferase 9
1715	gene17137:106610227	326.788	-0.375162	0.136028	-2.75798	0.00581592	0.0446268	ssa08	15255924	15321158	arhgap10	Rho GTPase activating protein 10
1716	gene17146:106610240	11.1097	0.924513	0.262622	3.52032	0.000431021	0.00927798	ssa08	15664637	15666998	LOC106610240	SWI/SNF-related matrix-associated actin-dependent regulator of chromatin subfamily A member 5-like
1717	gene17158:106610250	176.551	-0.286491	0.0913967	-3.13458	0.00172098	0.0213192	ssa08	16077445	16085927	LOC106610250	TBC1 domain family member 9-like
1718	gene17199:106610290	1041.2	-0.561751	0.144198	-3.8957	9.79175e-05	0.0038641	ssa08	17124654	17138326	LOC106610290	protein FAM13A-like%2C transcript variant X5
1719	gene17199:106610290	1041.2	-0.561751	0.144198	-3.8957	9.79175e-05	0.0038641	ssa08	17124654	17138752	LOC106610290	protein FAM13A-like%2C transcript variant X4
1720	gene17199:106610290	1041.2	-0.561751	0.144198	-3.8957	9.79175e-05	0.0038641	ssa08	17124654	17138754	LOC106610290	protein FAM13A-like%2C transcript variant X1
1721	gene17199:106610290	1041.2	-0.561751	0.144198	-3.8957	9.79175e-05	0.0038641	ssa08	17124654	17138753	LOC106610290	protein FAM13A-like%2C transcript variant X2
1722	gene17199:106610290	1041.2	-0.561751	0.144198	-3.8957	9.79175e-05	0.0038641	ssa08	17124654	17138753	LOC106610290	protein FAM13A-like%2C transcript variant X3
1723	gene17210:106610304	99.8287	-0.29472	0.109258	-2.69746	0.00698701	0.0498658	ssa08	17584734	17587571	LOC106610304	group XIIA secretory phospholipase A2-like
1724	gene17221:106610340	495.151	-0.675568	0.155643	-4.34049	1.42166e-05	0.00131772	ssa08	17968473	18030567	lef1	lymphoid enhancer-binding factor 1%2C transcript variant X9
1725	gene17221:106610340	495.151	-0.675568	0.155643	-4.34049	1.42166e-05	0.00131772	ssa08	17968478	18030567	lef1	lymphoid enhancer-binding factor 1%2C transcript variant X7
1726	gene17221:106610340	495.151	-0.675568	0.155643	-4.34049	1.42166e-05	0.00131772	ssa08	17968475	18030567	lef1	lymphoid enhancer-binding factor 1%2C transcript variant X8
1727	gene17221:106610340	495.151	-0.675568	0.155643	-4.34049	1.42166e-05	0.00131772	ssa08	17968479	18030567	lef1	lymphoid enhancer-binding factor 1%2C transcript variant X14
1728	gene17221:106610340	495.151	-0.675568	0.155643	-4.34049	1.42166e-05	0.00131772	ssa08	17968478	18030567	lef1	lymphoid enhancer-binding factor 1%2C transcript variant X5
1729	gene17221:106610340	495.151	-0.675568	0.155643	-4.34049	1.42166e-05	0.00131772	ssa08	17968480	18030567	lef1	lymphoid enhancer-binding factor 1%2C transcript variant X12
1730	gene17221:106610340	495.151	-0.675568	0.155643	-4.34049	1.42166e-05	0.00131772	ssa08	17968478	18030567	lef1	lymphoid enhancer-binding factor 1%2C transcript variant X6
1731	gene17221:106610340	495.151	-0.675568	0.155643	-4.34049	1.42166e-05	0.00131772	ssa08	17968477	18030567	lef1	lymphoid enhancer-binding factor 1%2C transcript variant X1
1732	gene17221:106610340	495.151	-0.675568	0.155643	-4.34049	1.42166e-05	0.00131772	ssa08	17968474	18030567	lef1	lymphoid enhancer-binding factor 1%2C transcript variant X10
1733	gene17221:106610340	495.151	-0.675568	0.155643	-4.34049	1.42166e-05	0.00131772	ssa08	17968480	18030567	lef1	lymphoid enhancer-binding factor 1%2C transcript variant X11
1734	gene17221:106610340	495.151	-0.675568	0.155643	-4.34049	1.42166e-05	0.00131772	ssa08	17968477	18030567	lef1	lymphoid enhancer-binding factor 1%2C transcript variant X13
1735	gene17221:106610340	495.151	-0.675568	0.155643	-4.34049	1.42166e-05	0.00131772	ssa08	17968475	18030567	lef1	lymphoid enhancer-binding factor 1%2C transcript variant X3
1736	gene17221:106610340	495.151	-0.675568	0.155643	-4.34049	1.42166e-05	0.00131772	ssa08	17968476	18030567	lef1	lymphoid enhancer-binding factor 1%2C transcript variant X2
1737	gene17221:106610340	495.151	-0.675568	0.155643	-4.34049	1.42166e-05	0.00131772	ssa08	17968476	18030567	lef1	lymphoid enhancer-binding factor 1%2C transcript variant X4
1738	gene1723:106612867	401.587	-0.301566	0.0886212	-3.40286	0.000666842	0.0123445	ssa01	91517688	91564202	LOC106612867	ligand-dependent corepressor-like%2C transcript variant X1
1739	gene1723:106612867	401.587	-0.301566	0.0886212	-3.40286	0.000666842	0.0123445	ssa01	91517688	91553902	LOC106612867	ligand-dependent corepressor-like%2C transcript variant X2
1740	gene17236:106610313	183.1	-0.319613	0.118512	-2.69688	0.00699926	0.0498999	ssa08	18443228	18494384	LOC106610313	nephronectin-like
1741	gene17243:106610328	57.5559	-0.605553	0.145395	-4.16489	3.11506e-05	0.00204618	ssa08	18735944	18764269	cxxc4	CXXC finger protein 4%2C transcript variant X1
1742	gene17243:106610328	57.5559	-0.605553	0.145395	-4.16489	3.11506e-05	0.00204618	ssa08	18735944	18764270	cxxc4	CXXC finger protein 4%2C transcript variant X2
1743	gene17243:106610328	57.5559	-0.605553	0.145395	-4.16489	3.11506e-05	0.00204618	ssa08	18736932	18764270	cxxc4	CXXC finger protein 4%2C transcript variant X3
1744	gene17243:106610328	57.5559	-0.605553	0.145395	-4.16489	3.11506e-05	0.00204618	ssa08	18735949	18764269	cxxc4	CXXC finger protein 4%2C transcript variant X4
1745	gene17253:106610320	137.156	0.347313	0.115444	3.00851	0.00262531	0.0277222	ssa08	18991762	19014781	LOC106610320	PRELI domain-containing protein 1%2C mitochondrial-like%2C transcript variant X3
1746	gene17253:106610320	137.156	0.347313	0.115444	3.00851	0.00262531	0.0277222	ssa08	18991762	19014781	LOC106610320	PRELI domain-containing protein 1%2C mitochondrial-like%2C transcript variant X1
1747	gene17253:106610320	137.156	0.347313	0.115444	3.00851	0.00262531	0.0277222	ssa08	18991756	19014781	LOC106610320	PRELI domain-containing protein 1%2C mitochondrial-like%2C transcript variant X2
1748	gene17254:106610321	29.2607	0.538346	0.193691	2.7794	0.00544588	0.0428851	ssa08	19027022	19070992	mxd4	MAX dimerization protein 4
1749	gene17256:106610319	14.8235	0.818515	0.248218	3.29757	0.000975251	0.0152449	ssa08	19105061	19128289	LOC106610319	proline-%2C glutamic acid- and leucine-rich protein 1-like%2C transcript variant X2
1750	gene17256:106610319	14.8235	0.818515	0.248218	3.29757	0.000975251	0.0152449	ssa08	19105061	19128289	LOC106610319	proline-%2C glutamic acid- and leucine-rich protein 1-like%2C transcript variant X3
1751	gene17256:106610319	14.8235	0.818515	0.248218	3.29757	0.000975251	0.0152449	ssa08	19105060	19128289	LOC106610319	proline-%2C glutamic acid- and leucine-rich protein 1-like%2C transcript variant X1
1752	gene17264:106610359	86.5761	-0.842803	0.175933	-4.79048	1.66379e-06	0.000360418	ssa08	19611259	19642195	LOC106610359	CXXC-type zinc finger protein 4%2C transcript variant X2
1753	gene17264:106610359	86.5761	-0.842803	0.175933	-4.79048	1.66379e-06	0.000360418	ssa08	19611259	19642185	LOC106610359	CXXC-type zinc finger protein 4%2C transcript variant X7
1754	gene17264:106610359	86.5761	-0.842803	0.175933	-4.79048	1.66379e-06	0.000360418	ssa08	19611259	19642195	LOC106610359	CXXC-type zinc finger protein 4%2C transcript variant X1
1755	gene17264:106610359	86.5761	-0.842803	0.175933	-4.79048	1.66379e-06	0.000360418	ssa08	19611259	19641177	LOC106610359	CXXC-type zinc finger protein 4%2C transcript variant X4
1756	gene17264:106610359	86.5761	-0.842803	0.175933	-4.79048	1.66379e-06	0.000360418	ssa08	19611259	19645329	LOC106610359	CXXC-type zinc finger protein 4%2C transcript variant X6
1757	gene17264:106610359	86.5761	-0.842803	0.175933	-4.79048	1.66379e-06	0.000360418	ssa08	19611259	19640036	LOC106610359	CXXC-type zinc finger protein 4%2C transcript variant X5
1758	gene1731:106612807	45.5902	-0.460608	0.170189	-2.70645	0.00680071	0.0491066	ssa01	92094141	92096737	LOC106612807	BAG family molecular chaperone regulator 2-like
1759	gene17334:106610398	132.513	0.367521	0.122398	3.00268	0.00267614	0.0280142	ssa08	20454160	20528081	mtus1	microtubule associated tumor suppressor 1%2C transcript variant X2
1760	gene17334:106610398	132.513	0.367521	0.122398	3.00268	0.00267614	0.0280142	ssa08	20454160	20545937	mtus1	microtubule associated tumor suppressor 1%2C transcript variant X3
1761	gene17334:106610398	132.513	0.367521	0.122398	3.00268	0.00267614	0.0280142	ssa08	20454160	20528081	mtus1	microtubule associated tumor suppressor 1%2C transcript variant X1
1762	gene17334:106610398	132.513	0.367521	0.122398	3.00268	0.00267614	0.0280142	ssa08	20454160	20483900	mtus1	microtubule associated tumor suppressor 1%2C transcript variant X5
1763	gene17334:106610398	132.513	0.367521	0.122398	3.00268	0.00267614	0.0280142	ssa08	20454160	20483900	mtus1	microtubule associated tumor suppressor 1%2C transcript variant X4
1764	gene17337:106610400	21.9052	0.603942	0.198666	3.03999	0.00236587	0.0260621	ssa08	20547585	20550468	LOC106610400	myotubularin-related protein 7-like
1765	gene17339:100195198	233.748	0.398864	0.0938146	4.25163	2.12225e-05	0.00165007	ssa08	20573175	20575879	vps37a	vacuolar protein sorting 37 homolog A (S. cerevisiae)
1766	gene17341:106610403	352.203	-0.573065	0.142961	-4.00854	6.10948e-05	0.00289822	ssa08	20771437	20777791	LOC106610403	myotubularin-related protein 7-like%2C transcript variant X2
1767	gene17341:106610403	352.203	-0.573065	0.142961	-4.00854	6.10948e-05	0.00289822	ssa08	20771437	20779714	LOC106610403	myotubularin-related protein 7-like%2C transcript variant X1
1768	gene1738:106612663	150.62	0.413075	0.151054	2.73463	0.00624506	0.0466029	ssa01	92512747	92528964	LOC106612663	protein FAM83B-like
1769	gene17415:106610472	352.221	0.227996	0.0794544	2.86952	0.00411102	0.0362286	ssa08	23605286	23611798	LOC106610472	E3 ubiquitin-protein ligase DTX4-like
1770	gene1743:106612617	4939.6	-0.357181	0.126714	-2.81881	0.00482021	0.0398593	ssa01	92720384	92725513	LOC106612617	kelch-like protein 31%2C transcript variant X2
1771	gene1743:106612617	4939.6	-0.357181	0.126714	-2.81881	0.00482021	0.0398593	ssa01	92720353	92725513	LOC106612617	kelch-like protein 31%2C transcript variant X1
1772	gene17446:106610491	95.0042	-0.601114	0.158238	-3.79879	0.000145404	0.00481982	ssa08	24060409	24070487	LOC106610491	uncharacterized LOC106610491%2C transcript variant X1
1773	gene17446:106610491	95.0042	-0.601114	0.158238	-3.79879	0.000145404	0.00481982	ssa08	24060409	24072071	LOC106610491	uncharacterized LOC106610491%2C transcript variant X2
1774	gene17454:106610497	140.301	0.53589	0.194609	2.75368	0.00589288	0.0449967	ssa08	24378609	24397692	LOC106610497	von Willebrand factor A domain-containing protein 7-like
1775	gene1746:100195096	1212.63	-0.309311	0.0663114	-4.66453	3.09329e-06	0.000544245	ssa01	92818006	92826537	fbx9	F-box only protein 9%2C transcript variant X2
1776	gene1746:100195096	1212.63	-0.309311	0.0663114	-4.66453	3.09329e-06	0.000544245	ssa01	92818006	92826589	fbx9	F-box only protein 9%2C transcript variant X3
1777	gene1746:100195096	1212.63	-0.309311	0.0663114	-4.66453	3.09329e-06	0.000544245	ssa01	92818006	92827570	fbx9	F-box only protein 9%2C transcript variant X1
1778	gene1746:100195096	1212.63	-0.309311	0.0663114	-4.66453	3.09329e-06	0.000544245	ssa01	92818006	92827352	fbx9	F-box only protein 9
1779	gene17461:106610508	5.72057	1.14909	0.399805	2.87413	0.00405145	0.0359196	ssa08	24528941	24532963	LOC106610508	von Willebrand factor A domain-containing protein 7-like
1780	gene1747:106612589	573.846	-0.150264	0.052059	-2.88641	0.00389668	0.0351292	ssa01	92829452	92841689	LOC106612589	serine/threonine-protein kinase ICK-like%2C transcript variant X2
1781	gene1747:106612589	573.846	-0.150264	0.052059	-2.88641	0.00389668	0.0351292	ssa01	92828268	92841689	LOC106612589	serine/threonine-protein kinase ICK-like%2C transcript variant X4
1782	gene1747:106612589	573.846	-0.150264	0.052059	-2.88641	0.00389668	0.0351292	ssa01	92829447	92841689	LOC106612589	serine/threonine-protein kinase ICK-like%2C transcript variant X1
1783	gene1747:106612589	573.846	-0.150264	0.052059	-2.88641	0.00389668	0.0351292	ssa01	92829958	92841689	LOC106612589	serine/threonine-protein kinase ICK-like%2C transcript variant X3
1784	gene1752:106612554	97.7292	-0.335818	0.0938425	-3.57853	0.000345538	0.00808464	ssa01	92898353	92946376	LOC106612554	1-acyl-sn-glycerol-3-phosphate acyltransferase epsilon-like%2C transcript variant X2
1785	gene1752:106612554	97.7292	-0.335818	0.0938425	-3.57853	0.000345538	0.00808464	ssa01	92898353	92946376	LOC106612554	1-acyl-sn-glycerol-3-phosphate acyltransferase epsilon-like%2C transcript variant X1
1786	gene1752:106612554	97.7292	-0.335818	0.0938425	-3.57853	0.000345538	0.00808464	ssa01	92912642	92946372	LOC106612554	1-acyl-sn-glycerol-3-phosphate acyltransferase epsilon-like%2C transcript variant X3
1787	gene17524:106610586	304.756	-0.335515	0.091886	-3.65142	0.000260792	0.00687241	ssa09	154581	166196	LOC106610586	mitochondrial basic amino acids transporter-like
1788	gene17528:106610590	976.727	-0.411992	0.125715	-3.2772	0.00104841	0.0159781	ssa09	371339	378265	LOC106610590	collagen alpha-1(X) chain-like
1789	gene1754:106612545	65.5109	-0.572438	0.149321	-3.83361	0.000126275	0.00446242	ssa01	92964565	92979137	LOC106612545	angiopoietin-2-like%2C transcript variant X1
1790	gene17541:106610601	70.1591	-0.550966	0.159186	-3.46114	0.000537901	0.0107569	ssa09	2691196	2758348	LOC106610601	leucine-rich repeat and fibronectin type-III domain-containing protein 2-like%2C transcript variant X3
1791	gene17541:106610601	70.1591	-0.550966	0.159186	-3.46114	0.000537901	0.0107569	ssa09	2691196	2921133	LOC106610601	leucine-rich repeat and fibronectin type-III domain-containing protein 2-like%2C transcript variant X4
1792	gene17541:106610601	70.1591	-0.550966	0.159186	-3.46114	0.000537901	0.0107569	ssa09	2691196	2921133	LOC106610601	leucine-rich repeat and fibronectin type-III domain-containing protein 2-like%2C transcript variant X2
1793	gene17541:106610601	70.1591	-0.550966	0.159186	-3.46114	0.000537901	0.0107569	ssa09	2691196	2921133	LOC106610601	leucine-rich repeat and fibronectin type-III domain-containing protein 2-like%2C transcript variant X6
1794	gene17541:106610601	70.1591	-0.550966	0.159186	-3.46114	0.000537901	0.0107569	ssa09	2691196	2921133	LOC106610601	leucine-rich repeat and fibronectin type-III domain-containing protein 2-like%2C transcript variant X1
1795	gene17541:106610601	70.1591	-0.550966	0.159186	-3.46114	0.000537901	0.0107569	ssa09	2691195	2921133	LOC106610601	leucine-rich repeat and fibronectin type-III domain-containing protein 2-like%2C transcript variant X5
1796	gene17541:106610601	70.1591	-0.550966	0.159186	-3.46114	0.000537901	0.0107569	ssa09	2691195	2758371	LOC106610601	leucine-rich repeat and fibronectin type-III domain-containing protein 2-like%2C transcript variant X7
1797	gene17543:106610602	219.119	0.216593	0.0767969	2.82034	0.00479731	0.0397225	ssa09	3480410	3496466	slc4a1ap	solute carrier family 4 (anion exchanger)%2C member 1%2C adaptor protein
1798	gene17546:106610607	2032.93	-0.454774	0.147808	-3.07679	0.00209241	0.0240685	ssa09	3643571	3646862	mrpl33	mitochondrial ribosomal protein L33
1799	gene17568:106610621	133.893	-0.476741	0.154901	-3.07772	0.00208591	0.0240377	ssa09	5255877	5263482	LOC106610621	protein odd-skipped-related 1-like%2C transcript variant X3
1800	gene17568:106610621	133.893	-0.476741	0.154901	-3.07772	0.00208591	0.0240377	ssa09	5255877	5264121	LOC106610621	protein odd-skipped-related 1-like%2C transcript variant X2
1801	gene17568:106610621	133.893	-0.476741	0.154901	-3.07772	0.00208591	0.0240377	ssa09	5255877	5264125	LOC106610621	protein odd-skipped-related 1-like%2C transcript variant X1
1802	gene17571:106610623	1099.01	-0.28066	0.102159	-2.74729	0.00600898	0.045518	ssa09	5635761	5640708	LOC106610623	uncharacterized protein C15orf57 homolog
1803	gene17572:100286698	184.068	-0.289396	0.103462	-2.79713	0.00515588	0.0415083	ssa09	5640850	5649595	pimt	Protein-L-isoaspartateD-aspartate O-methyltransferase
1804	gene17572:100286698	184.068	-0.289396	0.103462	-2.79713	0.00515588	0.0415083	ssa09	5640809	5649602	pimt	Protein-L-isoaspartateD-aspartate O-methyltransferase%2C transcript variant X1
1805	gene17577:106610627	226.737	-0.290092	0.0968031	-2.99672	0.00272899	0.0283447	ssa09	5843745	5926326	LOC106610627	ena/VASP-like protein%2C transcript variant X4
1806	gene17577:106610627	226.737	-0.290092	0.0968031	-2.99672	0.00272899	0.0283447	ssa09	5858857	5926326	LOC106610627	ena/VASP-like protein%2C transcript variant X2
1807	gene17577:106610627	226.737	-0.290092	0.0968031	-2.99672	0.00272899	0.0283447	ssa09	5858855	5926326	LOC106610627	ena/VASP-like protein%2C transcript variant X1
1808	gene17577:106610627	226.737	-0.290092	0.0968031	-2.99672	0.00272899	0.0283447	ssa09	5877126	5926326	LOC106610627	ena/VASP-like protein%2C transcript variant X5
1809	gene17577:106610627	226.737	-0.290092	0.0968031	-2.99672	0.00272899	0.0283447	ssa09	5851433	5926326	LOC106610627	ena/VASP-like protein%2C transcript variant X3
1810	gene17580:106610629	18.1494	0.694166	0.254256	2.73019	0.00632986	0.0469738	ssa09	6073005	6302404	LOC106610629	MAM domain-containing glycosylphosphatidylinositol anchor protein 2-like%2C transcript variant X2
1811	gene17580:106610629	18.1494	0.694166	0.254256	2.73019	0.00632986	0.0469738	ssa09	6073005	6302404	LOC106610629	MAM domain-containing glycosylphosphatidylinositol anchor protein 2-like%2C transcript variant X1
1812	gene17587:106610634	155.996	-0.298037	0.0990313	-3.00953	0.00261655	0.0276765	ssa09	6515471	6532902	LOC106610634	WD repeat-containing protein 20
1813	gene17596:106610655	369.227	-0.463202	0.129838	-3.56753	0.000360357	0.00831572	ssa09	6840401	6892138	LOC106610655	calcipressin-2-like
1814	gene1761:106612504	2388.61	-0.315674	0.112246	-2.81235	0.00491807	0.0403324	ssa01	93981685	93991231	LOC106612504	mitochondrial pyruvate carrier 1-like
1815	gene17615:106610673	175.504	0.506659	0.113695	4.45631	8.3382e-06	0.000958534	ssa09	8549288	8637059	LOC106610673	leucine zipper protein 1-like%2C transcript variant X2
1816	gene17615:106610673	175.504	0.506659	0.113695	4.45631	8.3382e-06	0.000958534	ssa09	8549288	8646219	LOC106610673	leucine zipper protein 1-like%2C transcript variant X1
1817	gene17639:100286553	694.928	-0.301779	0.104841	-2.87844	0.00399653	0.0355927	ssa09	9366381	9375365	LOC100286553	heterogeneous nuclear ribonucleoprotein Q%2C transcript variant X2
1818	gene17639:100286553	694.928	-0.301779	0.104841	-2.87844	0.00399653	0.0355927	ssa09	9366382	9375365	LOC100286553	heterogeneous nuclear ribonucleoprotein Q%2C transcript variant X5
1819	gene17639:100286553	694.928	-0.301779	0.104841	-2.87844	0.00399653	0.0355927	ssa09	9366381	9375365	LOC100286553	heterogeneous nuclear ribonucleoprotein Q%2C transcript variant X4
1820	gene17639:100286553	694.928	-0.301779	0.104841	-2.87844	0.00399653	0.0355927	ssa09	9366382	9375365	LOC100286553	heterogeneous nuclear ribonucleoprotein Q%2C transcript variant X3
1821	gene17639:100286553	694.928	-0.301779	0.104841	-2.87844	0.00399653	0.0355927	ssa09	9366381	9375365	LOC100286553	heterogeneous nuclear ribonucleoprotein Q%2C transcript variant X1
1822	gene17639:100286553	694.928	-0.301779	0.104841	-2.87844	0.00399653	0.0355927	ssa09	9366382	9375411	LOC100286553	heterogeneous nuclear ribonucleoprotein Q%2C transcript variant X6
1823	gene17649:106610697	1012.2	-0.402526	0.0984937	-4.08681	4.37338e-05	0.00240617	ssa09	10225230	10227826	LOC106610697	transcription factor SOX-11-like
1824	gene17652:106610698	270.62	-0.239892	0.0869609	-2.75862	0.00580463	0.0445856	ssa09	10632967	10699030	LOC106610698	probable E3 ubiquitin-protein ligase RNF144A-A%2C transcript variant X1
1825	gene17652:106610698	270.62	-0.239892	0.0869609	-2.75862	0.00580463	0.0445856	ssa09	10653009	10699030	LOC106610698	probable E3 ubiquitin-protein ligase RNF144A-A%2C transcript variant X4
1826	gene17652:106610698	270.62	-0.239892	0.0869609	-2.75862	0.00580463	0.0445856	ssa09	10632967	10699030	LOC106610698	probable E3 ubiquitin-protein ligase RNF144A-A%2C transcript variant X3
1827	gene17652:106610698	270.62	-0.239892	0.0869609	-2.75862	0.00580463	0.0445856	ssa09	10632967	10699030	LOC106610698	probable E3 ubiquitin-protein ligase RNF144A-A%2C transcript variant X2
1828	gene17662:106610722	4366.77	0.172571	0.0606275	2.84641	0.00442154	0.0377453	ssa09	11417242	11429856	LOC106610722	14-3-3 protein beta/alpha-1-like
1829	gene17688:106610738	8.71243	1.02083	0.28302	3.60693	0.00030984	0.00753997	ssa09	12969370	13036515	esrrg	estrogen-related receptor gamma%2C transcript variant X1
1830	gene17688:106610738	8.71243	1.02083	0.28302	3.60693	0.00030984	0.00753997	ssa09	12969370	13036515	esrrg	estrogen-related receptor gamma%2C transcript variant X2
1831	gene17699:106610754	296.646	-0.576201	0.139196	-4.13951	3.48051e-05	0.00217393	ssa09	13776430	13825186	LOC106610754	transcription regulator protein BACH2-like%2C transcript variant X1
1832	gene17699:106610754	296.646	-0.576201	0.139196	-4.13951	3.48051e-05	0.00217393	ssa09	13776430	13806740	LOC106610754	transcription regulator protein BACH2-like%2C transcript variant X2
1833	gene1771:106612430	231.264	-0.478821	0.140888	-3.39859	0.000677336	0.0124126	ssa01	94171814	94214629	LOC106612430	hexokinase-1
1834	gene17719:106610772	14846.4	-0.669823	0.216085	-3.09982	0.00193641	0.0228636	ssa09	14686045	14696550	LOC106610772	cytochrome c oxidase subunit 7A2%2C mitochondrial-like
1835	gene17720:106610773	4238.96	-0.405054	0.109235	-3.7081	0.000208817	0.00606625	ssa09	14699322	14772750	LOC106610773	collagen alpha-1(XII) chain-like%2C transcript variant X1
1836	gene17720:106610773	4238.96	-0.405054	0.109235	-3.7081	0.000208817	0.00606625	ssa09	14699325	14772750	LOC106610773	collagen alpha-1(XII) chain-like%2C transcript variant X2
1837	gene17737:106610793	259.703	-0.359113	0.13005	-2.76135	0.00575624	0.0443235	ssa09	16044091	16053530	LOC106610793	interactor protein for cytohesin exchange factors 1-like%2C transcript variant X1
1838	gene17737:106610793	259.703	-0.359113	0.13005	-2.76135	0.00575624	0.0443235	ssa09	16044091	16053233	LOC106610793	interactor protein for cytohesin exchange factors 1-like%2C transcript variant X2
1839	gene1774:106612408	504.478	-0.303763	0.0923124	-3.2906	0.000999742	0.015514	ssa01	94293868	94305519	LOC106612408	RUN and FYVE domain-containing protein 2-like%2C transcript variant X3
1840	gene1774:106612408	504.478	-0.303763	0.0923124	-3.2906	0.000999742	0.015514	ssa01	94292386	94308880	LOC106612408	RUN and FYVE domain-containing protein 2-like%2C transcript variant X2
1841	gene1774:106612408	504.478	-0.303763	0.0923124	-3.2906	0.000999742	0.015514	ssa01	94293868	94308880	LOC106612408	RUN and FYVE domain-containing protein 2-like%2C transcript variant X1
1842	gene17758:106610810	7710.32	-0.523854	0.104197	-5.02755	4.96776e-07	0.000162478	ssa09	17020452	17029086	LOC106610810	polyadenylate-binding protein 4-like
1843	gene17792:106610891	11.3188	1.21006	0.291241	4.15482	3.25538e-05	0.0020963	ssa09	18294051	18318592	fndc5	fibronectin type III domain containing 5%2C transcript variant X2
1844	gene17792:106610891	11.3188	1.21006	0.291241	4.15482	3.25538e-05	0.0020963	ssa09	18294612	18318592	fndc5	fibronectin type III domain containing 5%2C transcript variant X3
1845	gene17792:106610891	11.3188	1.21006	0.291241	4.15482	3.25538e-05	0.0020963	ssa09	18294612	18318592	fndc5	fibronectin type III domain containing 5%2C transcript variant X4
1846	gene17792:106610891	11.3188	1.21006	0.291241	4.15482	3.25538e-05	0.0020963	ssa09	18294051	18318592	fndc5	fibronectin type III domain containing 5%2C transcript variant X1
1847	gene17792:106610891	11.3188	1.21006	0.291241	4.15482	3.25538e-05	0.0020963	ssa09	18294051	18318592	fndc5	fibronectin type III domain containing 5%2C transcript variant X5
1848	gene17795:106610888	892.088	-0.175392	0.0614612	-2.85371	0.00432125	0.0372112	ssa09	18429229	18435912	bsdc1	BSD domain containing 1%2C transcript variant X2
1849	gene17795:106610888	892.088	-0.175392	0.0614612	-2.85371	0.00432125	0.0372112	ssa09	18429235	18435912	bsdc1	BSD domain containing 1%2C transcript variant X1
1850	gene17798:106610886	25.4981	-0.579444	0.208982	-2.77269	0.00555945	0.0434054	ssa09	18667311	18674546	LOC106610886	cytosolic 5'-nucleotidase 1A-like%2C transcript variant X2
1851	gene17798:106610886	25.4981	-0.579444	0.208982	-2.77269	0.00555945	0.0434054	ssa09	18667311	18675637	LOC106610886	cytosolic 5'-nucleotidase 1A-like%2C transcript variant X1
1852	gene17798:106610886	25.4981	-0.579444	0.208982	-2.77269	0.00555945	0.0434054	ssa09	18667311	18674546	LOC106610886	cytosolic 5'-nucleotidase 1A-like%2C transcript variant X3
1853	gene17798:106610886	25.4981	-0.579444	0.208982	-2.77269	0.00555945	0.0434054	ssa09	18667311	18675637	LOC106610886	cytosolic 5'-nucleotidase 1A-like%2C transcript variant X4
1854	gene1780:100380610	281.584	0.267093	0.0957602	2.78918	0.00528414	0.0421517	ssa01	94497328	94518462	pgs1	CDP-diacylglycerol--glycerol-3-phosphate 3-phosphatidyltransferase%2C transcript variant X2
1855	gene1780:100380610	281.584	0.267093	0.0957602	2.78918	0.00528414	0.0421517	ssa01	94498527	94517991	pgs1	CDP-diacylglycerol--glycerol-3-phosphate 3-phosphatidyltransferase
1856	gene1780:100380610	281.584	0.267093	0.0957602	2.78918	0.00528414	0.0421517	ssa01	94498313	94518462	pgs1	CDP-diacylglycerol--glycerol-3-phosphate 3-phosphatidyltransferase%2C transcript variant X1
1857	gene17801:106610885	158.223	-0.54235	0.189855	-2.85665	0.0042814	0.0369907	ssa09	18773700	18800992	LOC106610885	sodium-dependent lysophosphatidylcholine symporter 1-B-like%2C transcript variant X4
1858	gene17801:106610885	158.223	-0.54235	0.189855	-2.85665	0.0042814	0.0369907	ssa09	18773705	18800992	LOC106610885	sodium-dependent lysophosphatidylcholine symporter 1-B-like%2C transcript variant X2
1859	gene17801:106610885	158.223	-0.54235	0.189855	-2.85665	0.0042814	0.0369907	ssa09	18773702	18800992	LOC106610885	sodium-dependent lysophosphatidylcholine symporter 1-B-like%2C transcript variant X1
1860	gene17801:106610885	158.223	-0.54235	0.189855	-2.85665	0.0042814	0.0369907	ssa09	18773705	18798436	LOC106610885	sodium-dependent lysophosphatidylcholine symporter 1-B-like%2C transcript variant X3
1861	gene17802:100195762	112.036	0.828071	0.237097	3.49254	0.000478447	0.00996681	ssa09	18812096	18813852	cd276	CD276 molecule
1862	gene17804:106610882	341.821	0.410393	0.14973	2.74089	0.00612724	0.0459892	ssa09	18824905	18831930	LOC106610882	uncharacterized protein KIAA1522 homolog%2C transcript variant X5
1863	gene17804:106610882	341.821	0.410393	0.14973	2.74089	0.00612724	0.0459892	ssa09	18824905	18831930	LOC106610882	uncharacterized protein KIAA1522 homolog%2C transcript variant X4
1864	gene17804:106610882	341.821	0.410393	0.14973	2.74089	0.00612724	0.0459892	ssa09	18824905	18842485	LOC106610882	uncharacterized protein KIAA1522 homolog%2C transcript variant X2
1865	gene17804:106610882	341.821	0.410393	0.14973	2.74089	0.00612724	0.0459892	ssa09	18824905	18865888	LOC106610882	uncharacterized protein KIAA1522 homolog%2C transcript variant X3
1866	gene17804:106610882	341.821	0.410393	0.14973	2.74089	0.00612724	0.0459892	ssa09	18824906	18865887	LOC106610882	uncharacterized protein KIAA1522 homolog%2C transcript variant X1
1867	gene17811:106610878	180.343	-0.240236	0.0888688	-2.70327	0.00686615	0.0494156	ssa09	18930907	18953480	LOC106610878	protein FAM179B-like%2C transcript variant X2
1868	gene17811:106610878	180.343	-0.240236	0.0888688	-2.70327	0.00686615	0.0494156	ssa09	18930907	18972518	LOC106610878	protein FAM179B-like%2C transcript variant X1
1869	gene17811:106610878	180.343	-0.240236	0.0888688	-2.70327	0.00686615	0.0494156	ssa09	18930907	18955788	LOC106610878	protein FAM179B-like%2C transcript variant X3
1870	gene17813:106610876	240.957	-0.33355	0.101709	-3.27945	0.0010401	0.0158848	ssa09	18991755	18997102	LOC106610876	uncharacterized protein C14orf28 homolog
1871	gene17821:106610869	9.51518	1.00967	0.290842	3.47153	0.000517506	0.0105231	ssa09	19230654	19248630	LOC106610869	serine/threonine-protein kinase PAK 6-like%2C transcript variant X3
1872	gene17821:106610869	9.51518	1.00967	0.290842	3.47153	0.000517506	0.0105231	ssa09	19230654	19243224	LOC106610869	serine/threonine-protein kinase PAK 6-like%2C transcript variant X2
1873	gene17821:106610869	9.51518	1.00967	0.290842	3.47153	0.000517506	0.0105231	ssa09	19230654	19248630	LOC106610869	serine/threonine-protein kinase PAK 6-like%2C transcript variant X1
1874	gene1783:106612362	1035.63	-0.288847	0.0890642	-3.24313	0.00118225	0.0171331	ssa01	94632960	94648474	LOC106612362	metalloproteinase inhibitor 2-like
1875	gene17830:106610862	465.735	-0.312887	0.115396	-2.71141	0.00669977	0.0486401	ssa09	19397926	19406739	LOC106610862	signal recognition particle 14 kDa protein-like%2C transcript variant X1
1876	gene17830:106610862	465.735	-0.312887	0.115396	-2.71141	0.00669977	0.0486401	ssa09	19397926	19406716	LOC106610862	signal recognition particle 14 kDa protein-like%2C transcript variant X2
1877	gene17841:106610850	1600.04	-0.444373	0.101815	-4.36453	1.27397e-05	0.0012305	ssa09	19659778	19665196	LOC106610850	GTP cyclohydrolase 1 feedback regulatory protein-like
1878	gene17850:106610841	112.285	-0.452858	0.154185	-2.93711	0.00331283	0.0317036	ssa09	20091242	20093662	LOC106610841	gremlin-1-like
1879	gene17857:106610834	2202.42	-0.412742	0.106716	-3.86766	0.000109883	0.00413282	ssa09	20618299	20628620	LOC106610834	thrombospondin-1-like
1880	gene1787:106612307	86.5876	0.334455	0.122749	2.72471	0.00643575	0.0474403	ssa01	94715978	94741240	LOC106612307	uncharacterized LOC106612307%2C transcript variant X4
1881	gene1787:106612307	86.5876	0.334455	0.122749	2.72471	0.00643575	0.0474403	ssa01	94715978	94741246	LOC106612307	uncharacterized LOC106612307%2C transcript variant X1
1882	gene1787:106612307	86.5876	0.334455	0.122749	2.72471	0.00643575	0.0474403	ssa01	94715978	94741241	LOC106612307	uncharacterized LOC106612307%2C transcript variant X3
1883	gene1787:106612307	86.5876	0.334455	0.122749	2.72471	0.00643575	0.0474403	ssa01	94715978	94741250	LOC106612307	uncharacterized LOC106612307%2C transcript variant X2
1884	gene17883:106611062	201.375	-0.264086	0.0726635	-3.63437	0.000278661	0.00711868	ssa09	21845436	21850793	pomt2	protein-O-mannosyltransferase 2%2C transcript variant X3
1885	gene17883:106611062	201.375	-0.264086	0.0726635	-3.63437	0.000278661	0.00711868	ssa09	21844712	21850491	pomt2	protein-O-mannosyltransferase 2%2C transcript variant X1
1886	gene17883:106611062	201.375	-0.264086	0.0726635	-3.63437	0.000278661	0.00711868	ssa09	21845436	21850666	pomt2	protein-O-mannosyltransferase 2%2C transcript variant X2
1887	gene17884:106611061	102.76	0.477758	0.156937	3.04427	0.00233244	0.0258458	ssa09	21855246	22009377	LOC106611061	latent-transforming growth factor beta-binding protein 2-like%2C transcript variant X2
1888	gene17884:106611061	102.76	0.477758	0.156937	3.04427	0.00233244	0.0258458	ssa09	21855246	22009377	LOC106611061	latent-transforming growth factor beta-binding protein 2-like%2C transcript variant X3
1889	gene17884:106611061	102.76	0.477758	0.156937	3.04427	0.00233244	0.0258458	ssa09	21855246	22009377	LOC106611061	latent-transforming growth factor beta-binding protein 2-like%2C transcript variant X1
1890	gene179:106608562	373.498	-0.423733	0.113643	-3.72862	0.000192529	0.00573092	ssa01	7714825	7723414	LOC106608562	uncharacterized protein C15orf57 homolog%2C transcript variant X1
1891	gene179:106608562	373.498	-0.423733	0.113643	-3.72862	0.000192529	0.00573092	ssa01	7717111	7723402	LOC106608562	uncharacterized protein C15orf57 homolog%2C transcript variant X2
1892	gene17903:106611044	661.906	-0.517786	0.121546	-4.26001	2.04414e-05	0.00163689	ssa09	22628531	22644770	LOC106611044	transmembrane emp24 domain-containing protein 10-like
1893	gene1791:100194599	629.536	-0.186163	0.0594477	-3.13154	0.00173891	0.0214037	ssa01	94806525	94809037	nat9	N-acetyltransferase 9 (GCN5-related%2C putative)%2C transcript variant X1
1894	gene1791:100194599	629.536	-0.186163	0.0594477	-3.13154	0.00173891	0.0214037	ssa01	94805903	94808920	nat9	N-acetyltransferase 9 (GCN5-related%2C putative)
1895	gene17913:106611035	273.747	-0.273369	0.0851109	-3.21192	0.00131852	0.0181732	ssa09	22749959	22754856	LOC106611035	iron-sulfur cluster assembly 2 homolog%2C mitochondrial-like
1896	gene17925:106611029	184.369	-0.428989	0.12656	-3.38961	0.000699928	0.0126048	ssa09	22958872	22963312	LOC106611029	CLOCK-interacting pacemaker-like
1897	gene17930:106611022	301.779	-0.387508	0.0957857	-4.04557	5.21952e-05	0.0026505	ssa09	23114842	23118459	ap5m1	adaptor-related protein complex 5%2C mu 1 subunit
1898	gene17940:100194861	96.0095	0.37131	0.117578	3.15801	0.00158853	0.0203452	ssa09	23539160	23576496	lpp60	60 kDa lysophospholipase%2C transcript variant X1
1899	gene17940:100194861	96.0095	0.37131	0.117578	3.15801	0.00158853	0.0203452	ssa09	23539160	23576496	lpp60	60 kDa lysophospholipase%2C transcript variant X2
1900	gene17940:100194861	96.0095	0.37131	0.117578	3.15801	0.00158853	0.0203452	ssa09	23539190	23576496	lpp60	60 kDa lysophospholipase
1901	gene17964:106610991	700.221	-0.566555	0.127477	-4.44438	8.81455e-06	0.000991995	ssa09	24402277	24421942	LOC106610991	receptor expression-enhancing protein 1-like
1902	gene17967:106610992	100.977	-0.612182	0.192999	-3.17195	0.0015142	0.0197791	ssa09	24441701	24455072	LOC106610992	E3 ubiquitin-protein ligase RNF4-like%2C transcript variant X2
1903	gene17967:106610992	100.977	-0.612182	0.192999	-3.17195	0.0015142	0.0197791	ssa09	24441701	24455074	LOC106610992	E3 ubiquitin-protein ligase RNF4-like%2C transcript variant X1
1904	gene17972:106610985	232.725	-0.282877	0.0847697	-3.33701	0.000846854	0.0141271	ssa09	24615766	24637640	kif15	kinesin family member 15
1905	gene17981:106610975	928.154	-0.267532	0.0747337	-3.5798	0.000343857	0.00806911	ssa09	24820323	24837750	LOC106610975	protein phosphatase 1A-like%2C transcript variant X4
1906	gene17981:106610975	928.154	-0.267532	0.0747337	-3.5798	0.000343857	0.00806911	ssa09	24820320	24837750	LOC106610975	protein phosphatase 1A-like%2C transcript variant X3
1907	gene17981:106610975	928.154	-0.267532	0.0747337	-3.5798	0.000343857	0.00806911	ssa09	24820323	24837750	LOC106610975	protein phosphatase 1A-like%2C transcript variant X1
1908	gene17981:106610975	928.154	-0.267532	0.0747337	-3.5798	0.000343857	0.00806911	ssa09	24820322	24826331	LOC106610975	protein phosphatase 1A-like%2C transcript variant X2
1909	gene17984:100194542	239.253	-0.22497	0.0801404	-2.8072	0.00499739	0.040687	ssa09	24949211	24951236	six1	SIX homeobox 1
1910	gene17985:106610972	170.885	-0.430372	0.100857	-4.26717	1.97967e-05	0.00161635	ssa09	24957493	24964719	LOC106610972	homeobox protein SIX4-like
1911	gene18020:106610947	240.948	0.409369	0.14877	2.75169	0.00592885	0.0451701	ssa09	26425035	26428479	LOC106610947	beta-soluble NSF attachment protein-like%2C transcript variant X2
1912	gene18020:106610947	240.948	0.409369	0.14877	2.75169	0.00592885	0.0451701	ssa09	26422964	26428479	LOC106610947	beta-soluble NSF attachment protein-like%2C transcript variant X1
1913	gene18028:106610941	409.198	-0.344904	0.0821765	-4.19711	2.70346e-05	0.00190132	ssa09	26588198	26602711	LOC106610941	protein C9orf72-like%2C transcript variant X2
1914	gene18028:106610941	409.198	-0.344904	0.0821765	-4.19711	2.70346e-05	0.00190132	ssa09	26588198	26603210	LOC106610941	protein C9orf72-like%2C transcript variant X1
1915	gene18028:106610941	409.198	-0.344904	0.0821765	-4.19711	2.70346e-05	0.00190132	ssa09	26588198	26603101	LOC106610941	protein C9orf72-like%2C transcript variant X3
1916	gene18028:106610941	409.198	-0.344904	0.0821765	-4.19711	2.70346e-05	0.00190132	ssa09	26588198	26603200	LOC106610941	protein C9orf72-like%2C transcript variant X4
1917	gene18030:100194533	546.617	-0.236553	0.0854413	-2.7686	0.00562975	0.0437371	ssa09	26659218	26676629	eif4e1a	eukaryotic translation initiation factor 4e 1a
1918	gene1804:106612121	85.7546	-0.562143	0.129671	-4.33517	1.4565e-05	0.00134011	ssa01	95272087	95292133	tmem100	transmembrane protein 100
1919	gene18045:100195723	1073.55	-0.35956	0.0978046	-3.67631	0.000236634	0.00649201	ssa09	27116157	27118583	yipf5	Yip1 domain family%2C member 5
1920	gene18045:100195723	1073.55	-0.35956	0.0978046	-3.67631	0.000236634	0.00649201	ssa09	27115320	27118584	yipf5	Yip1 domain family%2C member 5%2C transcript variant X2
1921	gene18045:100195723	1073.55	-0.35956	0.0978046	-3.67631	0.000236634	0.00649201	ssa09	27116078	27118584	yipf5	Yip1 domain family%2C member 5%2C transcript variant X1
1922	gene18046:100196189	94.2293	0.462013	0.133631	3.45738	0.000545459	0.0108501	ssa09	27122217	27128039	diexf	digestive organ expansion factor homolog (zebrafish)%2C transcript variant X2
1923	gene18046:100196189	94.2293	0.462013	0.133631	3.45738	0.000545459	0.0108501	ssa09	27122217	27128039	diexf	digestive organ expansion factor homolog (zebrafish)%2C transcript variant X1
1924	gene18058:106611125	2574.76	-0.424194	0.129924	-3.26493	0.0010949	0.0163606	ssa09	27472432	27518241	LOC106611125	apolipoprotein B-100-like
1925	gene18059:106611124	464.721	-0.220695	0.0775877	-2.84445	0.0044488	0.0379003	ssa09	27525034	27528361	hs1bp3	HCLS1 binding protein 3
1926	gene18084:100196253	367.34	-0.243617	0.0709911	-3.43165	0.000599916	0.0115472	ssa09	29428930	29434258	dnal1	dynein%2C axonemal%2C light chain 1
1927	gene1809:100380378	321.716	0.248865	0.0802757	3.10012	0.00193441	0.0228471	ssa01	95612548	95628523	lips	Hormone-sensitive lipase
1928	gene18100:106611163	227.069	-0.512852	0.133644	-3.83744	0.000124322	0.00442039	ssa09	30285342	30306381	LOC106611163	stathmin-4-like%2C transcript variant X3
1929	gene18100:106611163	227.069	-0.512852	0.133644	-3.83744	0.000124322	0.00442039	ssa09	30284650	30306382	LOC106611163	stathmin-4-like%2C transcript variant X4
1930	gene18100:106611163	227.069	-0.512852	0.133644	-3.83744	0.000124322	0.00442039	ssa09	30285342	30306381	LOC106611163	stathmin-4-like%2C transcript variant X2
1931	gene18100:106611163	227.069	-0.512852	0.133644	-3.83744	0.000124322	0.00442039	ssa09	30285342	30306381	LOC106611163	stathmin-4-like%2C transcript variant X1
1932	gene18105:106611167	524.541	-0.332768	0.100107	-3.32412	0.000886978	0.0145047	ssa09	30516165	30702770	LOC106611167	cysteine-rich motor neuron 1 protein-like
1933	gene18116:106611175	459.698	0.439492	0.130566	3.36604	0.000762545	0.0132547	ssa09	31337418	31340394	LOC106611175	NF-kappa-B inhibitor alpha-like
1934	gene18119:106611178	1409.88	-0.248573	0.0748158	-3.32247	0.000892251	0.0145105	ssa09	31385203	31387729	LOC106611178	protein FAM177A1-like
1935	gene18124:106611182	93.6964	-0.300061	0.102061	-2.94003	0.00328184	0.0315036	ssa09	31887143	31926738	LOC106611182	leucine-rich repeat and fibronectin type-III domain-containing protein 5-like
1936	gene18129:106611186	26.3101	-0.655398	0.180668	-3.62764	0.00028602	0.00722296	ssa09	32494288	32499479	gpr135	G protein-coupled receptor 135
1937	gene1813:106612035	32.2427	0.716331	0.191904	3.73275	0.0001894	0.00567837	ssa01	95884769	96606169	rbfox3	RNA binding protein%2C fox-1 homolog (C. elegans) 3%2C transcript variant X1
1938	gene1813:106612035	32.2427	0.716331	0.191904	3.73275	0.0001894	0.00567837	ssa01	95884769	96069805	rbfox3	RNA binding protein%2C fox-1 homolog (C. elegans) 3%2C transcript variant X7
1939	gene1813:106612035	32.2427	0.716331	0.191904	3.73275	0.0001894	0.00567837	ssa01	95884769	96606170	rbfox3	RNA binding protein%2C fox-1 homolog (C. elegans) 3%2C transcript variant X3
1940	gene1813:106612035	32.2427	0.716331	0.191904	3.73275	0.0001894	0.00567837	ssa01	95884769	96606169	rbfox3	RNA binding protein%2C fox-1 homolog (C. elegans) 3%2C transcript variant X2
1941	gene1813:106612035	32.2427	0.716331	0.191904	3.73275	0.0001894	0.00567837	ssa01	95884769	96606169	rbfox3	RNA binding protein%2C fox-1 homolog (C. elegans) 3%2C transcript variant X6
1942	gene1813:106612035	32.2427	0.716331	0.191904	3.73275	0.0001894	0.00567837	ssa01	95884769	96033929	rbfox3	RNA binding protein%2C fox-1 homolog (C. elegans) 3%2C transcript variant X4
1943	gene1813:106612035	32.2427	0.716331	0.191904	3.73275	0.0001894	0.00567837	ssa01	95872093	96606168	rbfox3	RNA binding protein%2C fox-1 homolog (C. elegans) 3%2C transcript variant X5
1944	gene18133:106611191	697.733	-0.313279	0.0788651	-3.97235	7.11682e-05	0.00318824	ssa09	32627322	32631204	LOC106611191	protein tyrosine phosphatase type IVA 2-like
1945	gene18137:100196126	448.733	-0.277512	0.0870259	-3.18884	0.00142843	0.0190708	ssa09	32697259	32704102	cinp	cyclin-dependent kinase 2 interacting protein%2C transcript variant X2
1946	gene18137:100196126	448.733	-0.277512	0.0870259	-3.18884	0.00142843	0.0190708	ssa09	32697291	32704342	cinp	cyclin-dependent kinase 2 interacting protein
1947	gene18137:100196126	448.733	-0.277512	0.0870259	-3.18884	0.00142843	0.0190708	ssa09	32697259	32704343	cinp	cyclin-dependent kinase 2 interacting protein%2C transcript variant X1
1948	gene18167:100194616	2337.16	-0.499911	0.0991006	-5.04448	4.54749e-07	0.000154252	ssa09	34359065	34363357	cf12	cofilin 2
1949	gene18171:106611231	329.169	-0.186348	0.0632574	-2.94586	0.00322056	0.031187	ssa09	34415797	34440098	LOC106611231	protein transport protein Sec23A%2C transcript variant X2
1950	gene18171:106611231	329.169	-0.186348	0.0632574	-2.94586	0.00322056	0.031187	ssa09	34415797	34453458	LOC106611231	protein transport protein Sec23A%2C transcript variant X1
1951	gene18173:106611235	297.949	-0.37111	0.110781	-3.34996	0.000808234	0.0137554	ssa09	34521883	34523946	LOC106611235	complement component C1q receptor-like
1952	gene1818:106611983	408.412	-0.535115	0.134492	-3.97878	6.92701e-05	0.00314015	ssa01	96773102	96869529	baiap2	BAI1-associated protein 2%2C transcript variant X5
1953	gene1818:106611983	408.412	-0.535115	0.134492	-3.97878	6.92701e-05	0.00314015	ssa01	96728516	96871751	baiap2	BAI1-associated protein 2%2C transcript variant X7
1954	gene1818:106611983	408.412	-0.535115	0.134492	-3.97878	6.92701e-05	0.00314015	ssa01	96773102	96871751	baiap2	BAI1-associated protein 2%2C transcript variant X6
1955	gene1818:106611983	408.412	-0.535115	0.134492	-3.97878	6.92701e-05	0.00314015	ssa01	96773100	96871751	baiap2	BAI1-associated protein 2%2C transcript variant X2
1956	gene1818:106611983	408.412	-0.535115	0.134492	-3.97878	6.92701e-05	0.00314015	ssa01	96773101	96871751	baiap2	BAI1-associated protein 2%2C transcript variant X1
1957	gene1818:106611983	408.412	-0.535115	0.134492	-3.97878	6.92701e-05	0.00314015	ssa01	96773103	96861479	baiap2	BAI1-associated protein 2%2C transcript variant X4
1958	gene1818:106611983	408.412	-0.535115	0.134492	-3.97878	6.92701e-05	0.00314015	ssa01	96773101	96864341	baiap2	BAI1-associated protein 2%2C transcript variant X3
1959	gene18220:106611276	1645.58	-0.524043	0.128571	-4.07589	4.58395e-05	0.00246736	ssa09	38324485	38407685	LOC106611276	spectrin beta chain%2C erythrocytic-like%2C transcript variant X1
1960	gene18220:106611276	1645.58	-0.524043	0.128571	-4.07589	4.58395e-05	0.00246736	ssa09	38323317	38395165	LOC106611276	spectrin beta chain%2C erythrocytic-like%2C transcript variant X2
1961	gene18227:106611285	126.24	-0.349843	0.116774	-2.99589	0.00273642	0.0283522	ssa09	38782703	38805180	LOC106611285	metastasis-associated protein MTA1-like
1962	gene18234:106611295	663.383	-0.149659	0.0513037	-2.91711	0.0035329	0.033166	ssa09	39270732	39280033	ccdc28a	coiled-coil domain containing 28A
1963	gene18258:106611330	564.544	-0.3688	0.0921342	-4.00286	6.25824e-05	0.0029464	ssa09	40206921	40243731	LOC106611330	DNA (cytosine-5)-methyltransferase 3A-like%2C transcript variant X3
1964	gene18258:106611330	564.544	-0.3688	0.0921342	-4.00286	6.25824e-05	0.0029464	ssa09	40211847	40243729	LOC106611330	DNA (cytosine-5)-methyltransferase 3A-like%2C transcript variant X11
1965	gene18258:106611330	564.544	-0.3688	0.0921342	-4.00286	6.25824e-05	0.0029464	ssa09	40207016	40243731	LOC106611330	DNA (cytosine-5)-methyltransferase 3A-like%2C transcript variant X8
1966	gene18258:106611330	564.544	-0.3688	0.0921342	-4.00286	6.25824e-05	0.0029464	ssa09	40212138	40243729	LOC106611330	DNA (cytosine-5)-methyltransferase 3A-like%2C transcript variant X9
1967	gene18258:106611330	564.544	-0.3688	0.0921342	-4.00286	6.25824e-05	0.0029464	ssa09	40219821	40243731	LOC106611330	DNA (cytosine-5)-methyltransferase 3A-like%2C transcript variant X2
1968	gene18258:106611330	564.544	-0.3688	0.0921342	-4.00286	6.25824e-05	0.0029464	ssa09	40219821	40243731	LOC106611330	DNA (cytosine-5)-methyltransferase 3A-like%2C transcript variant X4
1969	gene18258:106611330	564.544	-0.3688	0.0921342	-4.00286	6.25824e-05	0.0029464	ssa09	40197502	40243729	LOC106611330	DNA (cytosine-5)-methyltransferase 3A-like%2C transcript variant X10
1970	gene18258:106611330	564.544	-0.3688	0.0921342	-4.00286	6.25824e-05	0.0029464	ssa09	40219821	40243731	LOC106611330	DNA (cytosine-5)-methyltransferase 3A-like%2C transcript variant X1
1971	gene18258:106611330	564.544	-0.3688	0.0921342	-4.00286	6.25824e-05	0.0029464	ssa09	40197478	40243731	LOC106611330	DNA (cytosine-5)-methyltransferase 3A-like%2C transcript variant X7
1972	gene18258:106611330	564.544	-0.3688	0.0921342	-4.00286	6.25824e-05	0.0029464	ssa09	40206918	40243731	LOC106611330	DNA (cytosine-5)-methyltransferase 3A-like%2C transcript variant X5
1973	gene18258:106611330	564.544	-0.3688	0.0921342	-4.00286	6.25824e-05	0.0029464	ssa09	40219820	40243731	LOC106611330	DNA (cytosine-5)-methyltransferase 3A-like%2C transcript variant X6
1974	gene18259:100196759	628.472	-0.511003	0.12827	-3.9838	6.78208e-05	0.00310336	ssa09	40249814	40271961	dpyl5	Dihydropyrimidinase-related protein 5
1975	gene18259:100196759	628.472	-0.511003	0.12827	-3.9838	6.78208e-05	0.00310336	ssa09	40255641	40273437	dpyl5	Dihydropyrimidinase-related protein 5%2C transcript variant X1
1976	gene18272:106611322	148.192	-0.22691	0.0820124	-2.76678	0.00566131	0.0438989	ssa09	40600769	40609202	LOC106611322	required for meiotic nuclear division protein 1 homolog
1977	gene18278:106611318	109.692	0.43975	0.145194	3.0287	0.00245607	0.0266023	ssa09	40818647	40866142	LOC106611318	syntaxin-binding protein 5-like%2C transcript variant X1
1978	gene18278:106611318	109.692	0.43975	0.145194	3.0287	0.00245607	0.0266023	ssa09	40818647	40866141	LOC106611318	syntaxin-binding protein 5-like%2C transcript variant X5
1979	gene18278:106611318	109.692	0.43975	0.145194	3.0287	0.00245607	0.0266023	ssa09	40818647	40866142	LOC106611318	syntaxin-binding protein 5-like%2C transcript variant X2
1980	gene18278:106611318	109.692	0.43975	0.145194	3.0287	0.00245607	0.0266023	ssa09	40818647	40866141	LOC106611318	syntaxin-binding protein 5-like%2C transcript variant X3
1981	gene18278:106611318	109.692	0.43975	0.145194	3.0287	0.00245607	0.0266023	ssa09	40818647	40866141	LOC106611318	syntaxin-binding protein 5-like%2C transcript variant X4
1982	gene18284:106611342	258.802	-0.393857	0.0993074	-3.96604	7.30778e-05	0.00323611	ssa09	41076388	41094023	LOC106611342	sex comb on midleg-like protein 4%2C transcript variant X3
1983	gene18284:106611342	258.802	-0.393857	0.0993074	-3.96604	7.30778e-05	0.00323611	ssa09	41083421	41094023	LOC106611342	sex comb on midleg-like protein 4%2C transcript variant X1
1984	gene18284:106611342	258.802	-0.393857	0.0993074	-3.96604	7.30778e-05	0.00323611	ssa09	41076443	41094023	LOC106611342	sex comb on midleg-like protein 4%2C transcript variant X2
1985	gene18284:106611342	258.802	-0.393857	0.0993074	-3.96604	7.30778e-05	0.00323611	ssa09	41083420	41094023	LOC106611342	sex comb on midleg-like protein 4%2C transcript variant X4
1986	gene18293:106611351	111.833	-0.360846	0.118672	-3.04069	0.00236033	0.0260216	ssa09	41294898	41298501	tp53i3	tumor protein p53 inducible protein 3%2C transcript variant X4
1987	gene18293:106611351	111.833	-0.360846	0.118672	-3.04069	0.00236033	0.0260216	ssa09	41295160	41298501	tp53i3	tumor protein p53 inducible protein 3%2C transcript variant X5
1988	gene18293:106611351	111.833	-0.360846	0.118672	-3.04069	0.00236033	0.0260216	ssa09	41295165	41298501	tp53i3	tumor protein p53 inducible protein 3%2C transcript variant X1
1989	gene18293:106611351	111.833	-0.360846	0.118672	-3.04069	0.00236033	0.0260216	ssa09	41294888	41298501	tp53i3	tumor protein p53 inducible protein 3%2C transcript variant X2
1990	gene18293:106611351	111.833	-0.360846	0.118672	-3.04069	0.00236033	0.0260216	ssa09	41294898	41298501	tp53i3	tumor protein p53 inducible protein 3%2C transcript variant X3
1991	gene18296:106611354	250.6	0.430705	0.158485	2.71764	0.0065749	0.0481158	ssa09	41338125	41353151	LOC106611354	transcription factor HIVEP2-like
1992	gene18332:106611384	110.006	0.520697	0.192457	2.70552	0.00681983	0.0492162	ssa09	43662315	43733743	LOC106611384	synaptosomal-associated protein 25-B-like%2C transcript variant X4
1993	gene18332:106611384	110.006	0.520697	0.192457	2.70552	0.00681983	0.0492162	ssa09	43662315	43733743	LOC106611384	synaptosomal-associated protein 25-B-like%2C transcript variant X1
1994	gene18332:106611384	110.006	0.520697	0.192457	2.70552	0.00681983	0.0492162	ssa09	43662315	43733743	LOC106611384	synaptosomal-associated protein 25-B-like%2C transcript variant X3
1995	gene18332:106611384	110.006	0.520697	0.192457	2.70552	0.00681983	0.0492162	ssa09	43662315	43733743	LOC106611384	synaptosomal-associated protein 25-B-like%2C transcript variant X2
1996	gene18365:106611415	10.0983	0.974413	0.307986	3.16383	0.0015571	0.0200943	ssa09	44977663	44983190	LOC106611415	tetratricopeptide repeat protein 9A-like
1997	gene18380:106611429	19.5092	1.03049	0.311175	3.31161	0.000927619	0.0148119	ssa09	45605366	45645655	LOC106611429	glioma tumor suppressor candidate region gene 1 protein-like%2C transcript variant X2
1998	gene18380:106611429	19.5092	1.03049	0.311175	3.31161	0.000927619	0.0148119	ssa09	45605366	45645656	LOC106611429	glioma tumor suppressor candidate region gene 1 protein-like%2C transcript variant X1
1999	gene18400:106611448	876.481	-0.587674	0.171418	-3.42831	0.000607352	0.0116187	ssa09	46309195	46316024	LOC106611448	proline-rich protein 3-like
[truncated: 10,093 more rows]

## Sheet: 30v100
	gene_ID	baseMean	log2FoldChange	lfcSE	stat	pvalue	padj	contig_ID	start	end	gene_name	product
1	gene1:106607996	51.2314	0.647861	0.164399	3.94077	8.12191e-05	0.00170728	ssa01	160437	198815	LOC106607996	histone-lysine N-methyltransferase NSD2-like
2	gene100:106602405	891.474	-0.569785	0.155495	-3.66433	0.000247987	0.00379269	ssa01	4303236	4306903	atp5s	ATP synthase%2C H+ transporting%2C mitochondrial Fo complex%2C subunit s (factor B)%2C transcript variant X2
3	gene100:106602405	891.474	-0.569785	0.155495	-3.66433	0.000247987	0.00379269	ssa01	4303236	4306903	atp5s	ATP synthase%2C H+ transporting%2C mitochondrial Fo complex%2C subunit s (factor B)%2C transcript variant X1
4	gene10002:106603563	282.66	0.220811	0.0780553	2.8289	0.00467081	0.0298	ssa04	47728564	47756804	LOC106603563	nuclear pore complex protein Nup98-Nup96-like%2C transcript variant X2
5	gene10002:106603563	282.66	0.220811	0.0780553	2.8289	0.00467081	0.0298	ssa04	47728564	47756803	LOC106603563	nuclear pore complex protein Nup98-Nup96-like%2C transcript variant X7
6	gene10002:106603563	282.66	0.220811	0.0780553	2.8289	0.00467081	0.0298	ssa04	47728564	47756483	LOC106603563	nuclear pore complex protein Nup98-Nup96-like%2C transcript variant X4
7	gene10002:106603563	282.66	0.220811	0.0780553	2.8289	0.00467081	0.0298	ssa04	47728564	47756803	LOC106603563	nuclear pore complex protein Nup98-Nup96-like%2C transcript variant X1
8	gene10002:106603563	282.66	0.220811	0.0780553	2.8289	0.00467081	0.0298	ssa04	47728564	47756805	LOC106603563	nuclear pore complex protein Nup98-Nup96-like%2C transcript variant X5
9	gene10002:106603563	282.66	0.220811	0.0780553	2.8289	0.00467081	0.0298	ssa04	47728564	47756802	LOC106603563	nuclear pore complex protein Nup98-Nup96-like%2C transcript variant X6
10	gene10002:106603563	282.66	0.220811	0.0780553	2.8289	0.00467081	0.0298	ssa04	47728564	47756482	LOC106603563	nuclear pore complex protein Nup98-Nup96-like%2C transcript variant X3
11	gene10007:100195190	59.3787	-0.777371	0.173162	-4.48926	7.14721e-06	0.000286486	ssa04	48170048	48194119	tmps2	Transmembrane protease%2C serine 2%2C transcript variant X1
12	gene10007:100195190	59.3787	-0.777371	0.173162	-4.48926	7.14721e-06	0.000286486	ssa04	48169741	48194074	tmps2	Transmembrane protease%2C serine 2
13	gene10008:106603558	1841.52	-0.230676	0.0766972	-3.00762	0.00263306	0.0199291	ssa04	48202585	48230472	acat1	acetyl-CoA acetyltransferase 1
14	gene10015:106603552	409.771	-0.448723	0.107628	-4.16919	3.05684e-05	0.000851019	ssa04	48506405	48516582	LOC106603552	nuclear receptor-interacting protein 1-like%2C transcript variant X3
15	gene10015:106603552	409.771	-0.448723	0.107628	-4.16919	3.05684e-05	0.000851019	ssa04	48448827	48516582	LOC106603552	nuclear receptor-interacting protein 1-like%2C transcript variant X1
16	gene10015:106603552	409.771	-0.448723	0.107628	-4.16919	3.05684e-05	0.000851019	ssa04	48448827	48516582	LOC106603552	nuclear receptor-interacting protein 1-like%2C transcript variant X2
17	gene10024:106603545	823.938	-0.153009	0.0535242	-2.85869	0.00425397	0.0278879	ssa04	48880582	48887611	LOC106603545	etoposide-induced protein 2.4 homolog
18	gene10028:106603541	270.668	0.511356	0.135783	3.76597	0.000165905	0.00286088	ssa04	48937292	48954917	LOC106603541	uncharacterized LOC106603541%2C transcript variant X3
19	gene10028:106603541	270.668	0.511356	0.135783	3.76597	0.000165905	0.00286088	ssa04	48937292	48954917	LOC106603541	uncharacterized LOC106603541%2C transcript variant X1
20	gene10028:106603541	270.668	0.511356	0.135783	3.76597	0.000165905	0.00286088	ssa04	48937292	48954917	LOC106603541	uncharacterized LOC106603541%2C transcript variant X4
21	gene10028:106603541	270.668	0.511356	0.135783	3.76597	0.000165905	0.00286088	ssa04	48937292	48954917	LOC106603541	uncharacterized LOC106603541%2C transcript variant X2
22	gene10029:106603540	212.676	-0.222733	0.0846825	-2.63022	0.00853307	0.0452356	ssa04	48975189	49000932	LOC106603540	protein Wnt-11-like
23	gene10040:106603530	65.0308	0.52612	0.155204	3.38985	0.000699302	0.00790275	ssa04	49386425	49415417	c2cd2	C2 calcium-dependent domain containing 2%2C transcript variant X2
24	gene10040:106603530	65.0308	0.52612	0.155204	3.38985	0.000699302	0.00790275	ssa04	49386425	49415417	c2cd2	C2 calcium-dependent domain containing 2%2C transcript variant X1
25	gene10041:106603529	19.7183	0.563284	0.182276	3.09028	0.00199965	0.0164262	ssa04	49423015	49452563	LOC106603529	PR domain zinc finger protein 15-like%2C transcript variant X3
26	gene10041:106603529	19.7183	0.563284	0.182276	3.09028	0.00199965	0.0164262	ssa04	49423015	49452563	LOC106603529	PR domain zinc finger protein 15-like%2C transcript variant X4
27	gene10041:106603529	19.7183	0.563284	0.182276	3.09028	0.00199965	0.0164262	ssa04	49423022	49452563	LOC106603529	PR domain zinc finger protein 15-like%2C transcript variant X2
28	gene10041:106603529	19.7183	0.563284	0.182276	3.09028	0.00199965	0.0164262	ssa04	49423015	49452563	LOC106603529	PR domain zinc finger protein 15-like%2C transcript variant X1
29	gene10041:106603529	19.7183	0.563284	0.182276	3.09028	0.00199965	0.0164262	ssa04	49423032	49452563	LOC106603529	PR domain zinc finger protein 15-like%2C transcript variant X6
30	gene10041:106603529	19.7183	0.563284	0.182276	3.09028	0.00199965	0.0164262	ssa04	49427689	49452563	LOC106603529	PR domain zinc finger protein 15-like%2C transcript variant X5
31	gene10046:106603524	241.725	-0.556305	0.161436	-3.44597	0.000569011	0.00684801	ssa04	49690274	50143174	LOC106603524	autism susceptibility gene 2 protein-like%2C transcript variant X4
32	gene10046:106603524	241.725	-0.556305	0.161436	-3.44597	0.000569011	0.00684801	ssa04	49690274	50143174	LOC106603524	autism susceptibility gene 2 protein-like%2C transcript variant X5
33	gene10046:106603524	241.725	-0.556305	0.161436	-3.44597	0.000569011	0.00684801	ssa04	49690274	50143173	LOC106603524	autism susceptibility gene 2 protein-like%2C transcript variant X2
34	gene10046:106603524	241.725	-0.556305	0.161436	-3.44597	0.000569011	0.00684801	ssa04	49690274	50005857	LOC106603524	autism susceptibility gene 2 protein-like%2C transcript variant X6
35	gene10046:106603524	241.725	-0.556305	0.161436	-3.44597	0.000569011	0.00684801	ssa04	49690274	49848965	LOC106603524	autism susceptibility gene 2 protein-like%2C transcript variant X7
36	gene10046:106603524	241.725	-0.556305	0.161436	-3.44597	0.000569011	0.00684801	ssa04	49690274	50143174	LOC106603524	autism susceptibility gene 2 protein-like%2C transcript variant X3
37	gene10046:106603524	241.725	-0.556305	0.161436	-3.44597	0.000569011	0.00684801	ssa04	49690274	50143174	LOC106603524	autism susceptibility gene 2 protein-like%2C transcript variant X1
38	gene10046:106603524	241.725	-0.556305	0.161436	-3.44597	0.000569011	0.00684801	ssa04	49690274	49714259	LOC106603524	autism susceptibility gene 2 protein-like%2C transcript variant X8
39	gene10052:106603521	121.867	0.253804	0.0951487	2.66744	0.00764314	0.0418567	ssa04	50743860	50765252	LOC106603521	ribosomal protein S6 kinase beta-1-like%2C transcript variant X2
40	gene10052:106603521	121.867	0.253804	0.0951487	2.66744	0.00764314	0.0418567	ssa04	50743860	50762391	LOC106603521	ribosomal protein S6 kinase beta-1-like%2C transcript variant X3
41	gene10052:106603521	121.867	0.253804	0.0951487	2.66744	0.00764314	0.0418567	ssa04	50743860	50763807	LOC106603521	ribosomal protein S6 kinase beta-1-like%2C transcript variant X1
42	gene10061:106603514	677.796	-0.320701	0.10525	-3.04705	0.00231102	0.0182427	ssa04	51185454	51191205	aspa	aspartoacylase%2C transcript variant X3
43	gene10061:106603514	677.796	-0.320701	0.10525	-3.04705	0.00231102	0.0182427	ssa04	51185742	51201071	aspa	aspartoacylase%2C transcript variant X8
44	gene10061:106603514	677.796	-0.320701	0.10525	-3.04705	0.00231102	0.0182427	ssa04	51185454	51191205	aspa	aspartoacylase%2C transcript variant X1
45	gene10061:106603514	677.796	-0.320701	0.10525	-3.04705	0.00231102	0.0182427	ssa04	51185454	51191205	aspa	aspartoacylase%2C transcript variant X4
46	gene10061:106603514	677.796	-0.320701	0.10525	-3.04705	0.00231102	0.0182427	ssa04	51185454	51191205	aspa	aspartoacylase%2C transcript variant X2
47	gene10061:106603514	677.796	-0.320701	0.10525	-3.04705	0.00231102	0.0182427	ssa04	51185454	51191205	aspa	aspartoacylase%2C transcript variant X6
48	gene10061:106603514	677.796	-0.320701	0.10525	-3.04705	0.00231102	0.0182427	ssa04	51185454	51191205	aspa	aspartoacylase%2C transcript variant X5
49	gene10061:106603514	677.796	-0.320701	0.10525	-3.04705	0.00231102	0.0182427	ssa04	51185454	51191205	aspa	aspartoacylase%2C transcript variant X7
50	gene10065:106603510	100.854	0.335482	0.111543	3.00764	0.00263286	0.0199291	ssa04	51442400	51625930	LOC106603510	cytospin-B-like%2C transcript variant X3
51	gene10065:106603510	100.854	0.335482	0.111543	3.00764	0.00263286	0.0199291	ssa04	51442404	51625930	LOC106603510	cytospin-B-like%2C transcript variant X2
52	gene10065:106603510	100.854	0.335482	0.111543	3.00764	0.00263286	0.0199291	ssa04	51485017	51611137	LOC106603510	cytospin-B-like%2C transcript variant X4
53	gene10065:106603510	100.854	0.335482	0.111543	3.00764	0.00263286	0.0199291	ssa04	51524720	51625930	LOC106603510	cytospin-B-like%2C transcript variant X5
54	gene10065:106603510	100.854	0.335482	0.111543	3.00764	0.00263286	0.0199291	ssa04	51485017	51625930	LOC106603510	cytospin-B-like%2C transcript variant X1
55	gene10077:106603497	50.4583	0.395084	0.136061	2.90372	0.00368757	0.0252934	ssa04	51961446	52012626	LOC106603497	protein FAM222B-like%2C transcript variant X1
56	gene10077:106603497	50.4583	0.395084	0.136061	2.90372	0.00368757	0.0252934	ssa04	51961446	52020880	LOC106603497	protein FAM222B-like%2C transcript variant X2
57	gene10093:106603486	2049.62	-0.493962	0.120205	-4.10934	3.96791e-05	0.00103087	ssa04	53334431	53340627	LOC106603486	ADP-ribosylation factor-like protein 9%2C transcript variant X1
58	gene10093:106603486	2049.62	-0.493962	0.120205	-4.10934	3.96791e-05	0.00103087	ssa04	53334768	53340627	LOC106603486	ADP-ribosylation factor-like protein 9%2C transcript variant X2
59	gene10095:106603485	216.536	0.293007	0.0860321	3.40578	0.000659747	0.00757119	ssa04	53352043	53394579	LOC106603485	G protein-coupled receptor kinase 6-like
60	gene10099:106603421	127.565	0.244102	0.0906502	2.69279	0.00708568	0.0397848	ssa04	53576148	53583425	LOC106603421	BRCA1-A complex subunit RAP80-like
61	gene101:106602521	80.5139	0.334222	0.126867	2.63442	0.00842799	0.0447959	ssa01	4306949	4333320	l2hgdh	L-2-hydroxyglutarate dehydrogenase
62	gene10102:106603477	95.0764	0.348045	0.120258	2.89416	0.00380173	0.0257971	ssa04	53787738	53835825	LOC106603477	histone-lysine N-methyltransferase%2C H3 lysine-36 and H4 lysine-20 specific-like%2C transcript variant X1
63	gene10102:106603477	95.0764	0.348045	0.120258	2.89416	0.00380173	0.0257971	ssa04	53786197	53835825	LOC106603477	histone-lysine N-methyltransferase%2C H3 lysine-36 and H4 lysine-20 specific-like%2C transcript variant X5
64	gene10102:106603477	95.0764	0.348045	0.120258	2.89416	0.00380173	0.0257971	ssa04	53784693	53835825	LOC106603477	histone-lysine N-methyltransferase%2C H3 lysine-36 and H4 lysine-20 specific-like%2C transcript variant X6
65	gene10102:106603477	95.0764	0.348045	0.120258	2.89416	0.00380173	0.0257971	ssa04	53787133	53835825	LOC106603477	histone-lysine N-methyltransferase%2C H3 lysine-36 and H4 lysine-20 specific-like%2C transcript variant X2
66	gene10102:106603477	95.0764	0.348045	0.120258	2.89416	0.00380173	0.0257971	ssa04	53786294	53835825	LOC106603477	histone-lysine N-methyltransferase%2C H3 lysine-36 and H4 lysine-20 specific-like%2C transcript variant X3
67	gene10102:106603477	95.0764	0.348045	0.120258	2.89416	0.00380173	0.0257971	ssa04	53791501	53835825	LOC106603477	histone-lysine N-methyltransferase%2C H3 lysine-36 and H4 lysine-20 specific-like%2C transcript variant X9
68	gene10102:106603477	95.0764	0.348045	0.120258	2.89416	0.00380173	0.0257971	ssa04	53787738	53835825	LOC106603477	histone-lysine N-methyltransferase%2C H3 lysine-36 and H4 lysine-20 specific-like%2C transcript variant X7
69	gene10102:106603477	95.0764	0.348045	0.120258	2.89416	0.00380173	0.0257971	ssa04	53786812	53835825	LOC106603477	histone-lysine N-methyltransferase%2C H3 lysine-36 and H4 lysine-20 specific-like%2C transcript variant X4
70	gene10102:106603477	95.0764	0.348045	0.120258	2.89416	0.00380173	0.0257971	ssa04	53789006	53835825	LOC106603477	histone-lysine N-methyltransferase%2C H3 lysine-36 and H4 lysine-20 specific-like%2C transcript variant X8
71	gene10105:106603475	1759.88	-0.501052	0.0965452	-5.18981	2.10505e-07	1.9411e-05	ssa04	53874892	53876552	LOC106603475	cytochrome c oxidase subunit 7B2%2C mitochondrial-like
72	gene10106:100194765	637.439	0.224226	0.0747488	2.99973	0.00270219	0.0202905	ssa04	53893545	53915039	pgk	Phosphoglycerate kinase
73	gene10108:106603473	67.2225	0.640899	0.161671	3.96421	7.36408e-05	0.00159293	ssa04	53960418	53987994	LOC106603473	angiomotin-like%2C transcript variant X7
74	gene10108:106603473	67.2225	0.640899	0.161671	3.96421	7.36408e-05	0.00159293	ssa04	53941962	53987993	LOC106603473	angiomotin-like%2C transcript variant X5
75	gene10108:106603473	67.2225	0.640899	0.161671	3.96421	7.36408e-05	0.00159293	ssa04	53957147	53987993	LOC106603473	angiomotin-like%2C transcript variant X3
76	gene10108:106603473	67.2225	0.640899	0.161671	3.96421	7.36408e-05	0.00159293	ssa04	53939190	53987993	LOC106603473	angiomotin-like%2C transcript variant X4
77	gene10108:106603473	67.2225	0.640899	0.161671	3.96421	7.36408e-05	0.00159293	ssa04	53941962	53987993	LOC106603473	angiomotin-like%2C transcript variant X1
78	gene10108:106603473	67.2225	0.640899	0.161671	3.96421	7.36408e-05	0.00159293	ssa04	53941962	53987993	LOC106603473	angiomotin-like%2C transcript variant X6
79	gene10108:106603473	67.2225	0.640899	0.161671	3.96421	7.36408e-05	0.00159293	ssa04	53941962	53987993	LOC106603473	angiomotin-like%2C transcript variant X2
80	gene10113:100196805	2524.33	-0.540152	0.199093	-2.71306	0.00666645	0.0381625	ssa04	54116754	54126917	mlrb	Myosin regulatory light chain 2B%2C cardiac muscle isoform
81	gene10118:106603466	310.189	-0.175641	0.0668171	-2.62868	0.00857163	0.0453849	ssa04	54498054	54531466	trim37	tripartite motif containing 37%2C transcript variant X2
82	gene10118:106603466	310.189	-0.175641	0.0668171	-2.62868	0.00857163	0.0453849	ssa04	54498054	54531466	trim37	tripartite motif containing 37%2C transcript variant X1
83	gene10119:106603465	80.1407	0.474472	0.147818	3.20984	0.00132808	0.0123537	ssa04	54534357	54628077	ppm1e	protein phosphatase%2C Mg2+/Mn2+ dependent%2C 1E
84	gene10120:106603463	121.02	-0.362222	0.114379	-3.16686	0.00154093	0.0137477	ssa04	54641553	54672933	rad51c	RAD51 paralog C
85	gene10122:106603464	638.232	-0.656268	0.1165	-5.63321	1.76889e-08	2.91957e-06	ssa04	54694852	54700933	ska2	spindle and kinetochore associated complex subunit 2
86	gene10123:100196673	6327.77	-0.24476	0.0755707	-3.23883	0.00120021	0.0115273	ssa04	54714783	54720889	LOC100196673	malate dehydrogenase 2-1%2C NAD (mitochondrial)
87	gene10129:106603457	31.5075	0.474746	0.16842	2.81882	0.00482012	0.0304417	ssa04	54838087	54841480	orai2	ORAI calcium release-activated calcium modulator 2%2C transcript variant X1
88	gene10129:106603457	31.5075	0.474746	0.16842	2.81882	0.00482012	0.0304417	ssa04	54838087	54843414	orai2	ORAI calcium release-activated calcium modulator 2%2C transcript variant X4
89	gene10129:106603457	31.5075	0.474746	0.16842	2.81882	0.00482012	0.0304417	ssa04	54838087	54843414	orai2	ORAI calcium release-activated calcium modulator 2%2C transcript variant X2
90	gene10129:106603457	31.5075	0.474746	0.16842	2.81882	0.00482012	0.0304417	ssa04	54838087	54843414	orai2	ORAI calcium release-activated calcium modulator 2%2C transcript variant X3
91	gene10134:106603416	114.954	0.299543	0.0885137	3.38415	0.000714001	0.00801583	ssa04	54934923	54958244	LOC106603416	E3 ubiquitin-protein ligase CBL-like
92	gene10136:106603453	283.219	-0.459004	0.102789	-4.4655	7.98823e-06	0.000310379	ssa04	55109914	55125738	LOC106603453	derlin-2-like
93	gene10143:100195386	1161.38	-0.338591	0.0984993	-3.43749	0.000587125	0.00699903	ssa04	55296440	55303587	psmg1	proteasome (prosome%2C macropain) assembly chaperone 1
94	gene10144:100195060	942.644	-0.334247	0.107858	-3.09896	0.00194203	0.0160706	ssa04	55352535	55361939	ets2	v-ets erythroblastosis virus E26 oncogene homolog 2 (avian)
95	gene10150:100196862	336.633	-0.289521	0.078413	-3.69225	0.000222277	0.00350521	ssa04	55722327	55724283	pigp	phosphatidylinositol glycan anchor biosynthesis%2C class P
96	gene10150:100196862	336.633	-0.289521	0.078413	-3.69225	0.000222277	0.00350521	ssa04	55719920	55724287	pigp	phosphatidylinositol glycan anchor biosynthesis%2C class P%2C transcript variant X1
97	gene10150:100196862	336.633	-0.289521	0.078413	-3.69225	0.000222277	0.00350521	ssa04	55721397	55724287	pigp	phosphatidylinositol glycan anchor biosynthesis%2C class P%2C transcript variant X3
98	gene10150:100196862	336.633	-0.289521	0.078413	-3.69225	0.000222277	0.00350521	ssa04	55722340	55724287	pigp	phosphatidylinositol glycan anchor biosynthesis%2C class P%2C transcript variant X2
99	gene10153:106603442	209.009	0.209094	0.075747	2.76043	0.00577257	0.0344879	ssa04	55853412	55939898	LOC106603442	uncharacterized LOC106603442%2C transcript variant X1
100	gene10153:106603442	209.009	0.209094	0.075747	2.76043	0.00577257	0.0344879	ssa04	55853412	55939898	LOC106603442	uncharacterized LOC106603442%2C transcript variant X2
101	gene10153:106603442	209.009	0.209094	0.075747	2.76043	0.00577257	0.0344879	ssa04	55870902	55939898	LOC106603442	uncharacterized LOC106603442%2C transcript variant X3
102	gene10161:100196226	640.495	-0.272339	0.0923134	-2.95015	0.00317616	0.0227074	ssa04	56038546	56059466	t120a	Transmembrane protein 120A%2C transcript variant X3
103	gene10161:100196226	640.495	-0.272339	0.0923134	-2.95015	0.00317616	0.0227074	ssa04	56052752	56059466	t120a	Transmembrane protein 120A%2C transcript variant X5
104	gene10161:100196226	640.495	-0.272339	0.0923134	-2.95015	0.00317616	0.0227074	ssa04	56038546	56059466	t120a	Transmembrane protein 120A%2C transcript variant X4
105	gene10161:100196226	640.495	-0.272339	0.0923134	-2.95015	0.00317616	0.0227074	ssa04	56038546	56059466	t120a	Transmembrane protein 120A%2C transcript variant X1
106	gene10161:100196226	640.495	-0.272339	0.0923134	-2.95015	0.00317616	0.0227074	ssa04	56038546	56059466	t120a	Transmembrane protein 120A%2C transcript variant X2
107	gene10161:100196226	640.495	-0.272339	0.0923134	-2.95015	0.00317616	0.0227074	ssa04	56052601	56059465	t120a	Transmembrane protein 120A
108	gene10173:106603626	85.8887	-0.474806	0.115312	-4.11759	3.82852e-05	0.00100545	ssa04	56224598	56228831	LOC106603626	frizzled-9-like
109	gene10179:106603631	197.469	0.550332	0.115045	4.78361	1.72174e-06	0.000100377	ssa04	56316531	56336486	LOC106603631	myb-binding protein 1A-like protein
110	gene10199:106603674	555.624	-0.203966	0.0633281	-3.22078	0.00127843	0.0120373	ssa04	58937557	58980641	LOC106603674	junctional adhesion molecule C-like
111	gene102:106601599	54.7451	0.597069	0.167276	3.56937	0.000357844	0.00489444	ssa01	4338543	4434915	sos2	son of sevenless homolog 2 (Drosophila)
112	gene10201:106603672	210.63	-0.445011	0.0877127	-5.0735	3.90563e-07	3.09317e-05	ssa04	59015259	59021751	vps26b	VPS26 retromer complex component B
113	gene10219:106603658	26.0833	-0.617806	0.156527	-3.94697	7.91457e-05	0.00167681	ssa04	60913292	60923546	LOC106603658	zona pellucida-like domain-containing protein 1
114	gene10220:100380749	231.87	0.366803	0.1287	2.85006	0.00437112	0.0284188	ssa04	60922094	60951107	LOC100380749	hypoxia up-regulated protein 1%2C transcript variant X2
115	gene10220:100380749	231.87	0.366803	0.1287	2.85006	0.00437112	0.0284188	ssa04	60922094	60945410	LOC100380749	hypoxia up-regulated protein 1%2C transcript variant X1
116	gene10223:106603655	226.804	0.231344	0.0778462	2.97181	0.00296054	0.0215952	ssa04	61016262	61058789	LOC106603655	HMG box transcription factor BBX-like%2C transcript variant X9
117	gene10223:106603655	226.804	0.231344	0.0778462	2.97181	0.00296054	0.0215952	ssa04	61016262	61058789	LOC106603655	HMG box transcription factor BBX-like%2C transcript variant X8
118	gene10223:106603655	226.804	0.231344	0.0778462	2.97181	0.00296054	0.0215952	ssa04	61016262	61058453	LOC106603655	HMG box transcription factor BBX-like%2C transcript variant X2
119	gene10223:106603655	226.804	0.231344	0.0778462	2.97181	0.00296054	0.0215952	ssa04	61016262	61058453	LOC106603655	HMG box transcription factor BBX-like%2C transcript variant X5
120	gene10223:106603655	226.804	0.231344	0.0778462	2.97181	0.00296054	0.0215952	ssa04	61016262	61057719	LOC106603655	HMG box transcription factor BBX-like%2C transcript variant X3
121	gene10223:106603655	226.804	0.231344	0.0778462	2.97181	0.00296054	0.0215952	ssa04	61016262	61058789	LOC106603655	HMG box transcription factor BBX-like%2C transcript variant X10
122	gene10223:106603655	226.804	0.231344	0.0778462	2.97181	0.00296054	0.0215952	ssa04	61016262	61058789	LOC106603655	HMG box transcription factor BBX-like%2C transcript variant X1
123	gene10223:106603655	226.804	0.231344	0.0778462	2.97181	0.00296054	0.0215952	ssa04	61016262	61057919	LOC106603655	HMG box transcription factor BBX-like%2C transcript variant X4
124	gene10223:106603655	226.804	0.231344	0.0778462	2.97181	0.00296054	0.0215952	ssa04	61016262	61058454	LOC106603655	HMG box transcription factor BBX-like%2C transcript variant X6
125	gene10223:106603655	226.804	0.231344	0.0778462	2.97181	0.00296054	0.0215952	ssa04	61016262	61058789	LOC106603655	HMG box transcription factor BBX-like%2C transcript variant X7
126	gene10228:100380315	112.771	0.436247	0.0840049	5.19311	2.06813e-07	1.92032e-05	ssa04	61277597	61280666	i2bp1	Interferon regulatory factor 2-binding protein 1%2C transcript variant X1
127	gene10228:100380315	112.771	0.436247	0.0840049	5.19311	2.06813e-07	1.92032e-05	ssa04	61277597	61280638	i2bp1	Interferon regulatory factor 2-binding protein 1
128	gene10229:106603651	6.12475	0.97971	0.28746	3.40816	0.000654034	0.00752721	ssa04	61283544	61305534	LOC106603651	cation channel sperm-associated protein subunit gamma-like
129	gene10230:106603686	106.984	0.315616	0.121849	2.59023	0.00959114	0.0490572	ssa04	61335754	61344025	hic2	hypermethylated in cancer 2
130	gene10246:106603697	37.0506	-0.709857	0.146571	-4.84311	1.27823e-06	8.00821e-05	ssa04	61882545	61885741	LOC106603697	uncharacterized LOC106603697%2C transcript variant X1
131	gene10246:106603697	37.0506	-0.709857	0.146571	-4.84311	1.27823e-06	8.00821e-05	ssa04	61882185	61885741	LOC106603697	uncharacterized LOC106603697%2C transcript variant X2
132	gene10247:106603699	127.191	-0.369074	0.103865	-3.5534	0.00038029	0.00509968	ssa04	61894427	61900628	LOC106603699	delta-like protein B
133	gene10250:106603701	378.597	-0.39599	0.110864	-3.57185	0.00035447	0.00486184	ssa04	61932615	61942116	LOC106603701	myb-related transcription factor%2C partner of profilin-like%2C transcript variant X1
134	gene10250:106603701	378.597	-0.39599	0.110864	-3.57185	0.00035447	0.00486184	ssa04	61932615	61942125	LOC106603701	myb-related transcription factor%2C partner of profilin-like%2C transcript variant X3
135	gene10250:106603701	378.597	-0.39599	0.110864	-3.57185	0.00035447	0.00486184	ssa04	61932615	61942126	LOC106603701	myb-related transcription factor%2C partner of profilin-like%2C transcript variant X2
136	gene10255:106603705	5382.74	-0.304099	0.0797081	-3.81516	0.000136097	0.00248197	ssa04	62028054	62032540	LOC106603705	histone H3.3
137	gene10260:106603708	22620	-0.925944	0.175122	-5.28742	1.24055e-07	1.32783e-05	ssa04	62151102	62158978	LOC106603708	40S ribosomal protein S3
138	gene10266:106603714	22.5583	0.734682	0.202545	3.62725	0.000286451	0.00421911	ssa04	62338408	62419685	LOC106603714	calpain-5-like%2C transcript variant X1
139	gene10266:106603714	22.5583	0.734682	0.202545	3.62725	0.000286451	0.00421911	ssa04	62338408	62419596	LOC106603714	calpain-5-like%2C transcript variant X2
140	gene10268:106603716	100.597	0.231586	0.0800845	2.89177	0.00383081	0.0259407	ssa04	62420654	62449896	LOC106603716	cullin-5-like%2C transcript variant X2
141	gene10268:106603716	100.597	0.231586	0.0800845	2.89177	0.00383081	0.0259407	ssa04	62420654	62449904	LOC106603716	cullin-5-like%2C transcript variant X1
142	gene10268:106603716	100.597	0.231586	0.0800845	2.89177	0.00383081	0.0259407	ssa04	62420654	62449904	LOC106603716	cullin-5-like%2C transcript variant X3
143	gene1027:106604361	46.7255	0.639634	0.158462	4.03651	5.42513e-05	0.00127917	ssa01	47481131	47515642	pprc1	peroxisome proliferator-activated receptor gamma%2C coactivator-related 1
144	gene10270:106603718	1548.57	-0.528099	0.166204	-3.17741	0.00148597	0.0134163	ssa04	62472312	62498172	LOC106603718	ELMO domain-containing protein 1-like%2C transcript variant X1
145	gene10270:106603718	1548.57	-0.528099	0.166204	-3.17741	0.00148597	0.0134163	ssa04	62472325	62498172	LOC106603718	ELMO domain-containing protein 1-like%2C transcript variant X2
146	gene10281:106603728	30.5946	0.725533	0.183464	3.95464	7.66509e-05	0.0016373	ssa04	63128149	63167498	LOC106603728	alpha-tectorin-like%2C transcript variant X4
147	gene10281:106603728	30.5946	0.725533	0.183464	3.95464	7.66509e-05	0.0016373	ssa04	63128149	63161275	LOC106603728	alpha-tectorin-like%2C transcript variant X1
148	gene10281:106603728	30.5946	0.725533	0.183464	3.95464	7.66509e-05	0.0016373	ssa04	63136140	63161281	LOC106603728	alpha-tectorin-like%2C transcript variant X5
149	gene10281:106603728	30.5946	0.725533	0.183464	3.95464	7.66509e-05	0.0016373	ssa04	63128149	63167729	LOC106603728	alpha-tectorin-like%2C transcript variant X3
150	gene10281:106603728	30.5946	0.725533	0.183464	3.95464	7.66509e-05	0.0016373	ssa04	63126098	63161276	LOC106603728	alpha-tectorin-like%2C transcript variant X2
151	gene1029:106604370	451.704	0.190819	0.0528287	3.61203	0.000303808	0.0043731	ssa01	47552759	47594549	ldb1	LIM domain binding 1%2C transcript variant X7
152	gene1029:106604370	451.704	0.190819	0.0528287	3.61203	0.000303808	0.0043731	ssa01	47552756	47594549	ldb1	LIM domain binding 1%2C transcript variant X3
153	gene1029:106604370	451.704	0.190819	0.0528287	3.61203	0.000303808	0.0043731	ssa01	47552752	47594549	ldb1	LIM domain binding 1%2C transcript variant X5
154	gene1029:106604370	451.704	0.190819	0.0528287	3.61203	0.000303808	0.0043731	ssa01	47570475	47594549	ldb1	LIM domain binding 1%2C transcript variant X4
155	gene1029:106604370	451.704	0.190819	0.0528287	3.61203	0.000303808	0.0043731	ssa01	47552755	47594549	ldb1	LIM domain binding 1%2C transcript variant X1
156	gene1029:106604370	451.704	0.190819	0.0528287	3.61203	0.000303808	0.0043731	ssa01	47552757	47594549	ldb1	LIM domain binding 1%2C transcript variant X6
157	gene1029:106604370	451.704	0.190819	0.0528287	3.61203	0.000303808	0.0043731	ssa01	47552756	47594549	ldb1	LIM domain binding 1%2C transcript variant X2
158	gene103:106602591	16.9086	1.24461	0.449159	2.77099	0.00558866	0.033716	ssa01	4442615	4470320	LOC106602591	uncharacterized LOC106602591%2C transcript variant X2
159	gene103:106602591	16.9086	1.24461	0.449159	2.77099	0.00558866	0.033716	ssa01	4442615	4470320	LOC106602591	uncharacterized LOC106602591%2C transcript variant X1
160	gene103:106602591	16.9086	1.24461	0.449159	2.77099	0.00558866	0.033716	ssa01	4442615	4470320	LOC106602591	uncharacterized LOC106602591%2C transcript variant X3
161	gene10300:106603745	127.905	-0.399258	0.105352	-3.78977	0.000150787	0.0026553	ssa04	63764458	63776308	ccdc84	coiled-coil domain containing 84%2C transcript variant X2
162	gene10300:106603745	127.905	-0.399258	0.105352	-3.78977	0.000150787	0.0026553	ssa04	63764458	63776308	ccdc84	coiled-coil domain containing 84%2C transcript variant X1
163	gene10318:106603783	112.399	0.340272	0.131187	2.59379	0.00949233	0.0487231	ssa04	64609093	64620086	tmem248	transmembrane protein 248%2C transcript variant X3
164	gene10318:106603783	112.399	0.340272	0.131187	2.59379	0.00949233	0.0487231	ssa04	64609094	64619874	tmem248	transmembrane protein 248%2C transcript variant X2
165	gene10318:106603783	112.399	0.340272	0.131187	2.59379	0.00949233	0.0487231	ssa04	64609094	64619883	tmem248	transmembrane protein 248%2C transcript variant X1
166	gene10319:106603782	159.745	-0.529575	0.132548	-3.99535	6.45984e-05	0.00145836	ssa04	64619970	64628865	rad51d	RAD51 paralog D
167	gene10320:100194680	421.867	0.208892	0.0676323	3.08864	0.00201075	0.0164933	ssa04	64628789	64654102	lig3	ligase III%2C DNA%2C ATP-dependent%2C transcript variant X1
168	gene10320:100194680	421.867	0.208892	0.0676323	3.08864	0.00201075	0.0164933	ssa04	64628789	64654102	lig3	ligase III%2C DNA%2C ATP-dependent%2C transcript variant X2
169	gene10328:106603773	237.827	-0.348781	0.109565	-3.18334	0.00145587	0.0131803	ssa04	65918311	65927604	LOC106603773	leucine-rich repeat-containing protein 32-like%2C transcript variant X7
170	gene10328:106603773	237.827	-0.348781	0.109565	-3.18334	0.00145587	0.0131803	ssa04	65918538	65927604	LOC106603773	leucine-rich repeat-containing protein 32-like%2C transcript variant X5
171	gene10328:106603773	237.827	-0.348781	0.109565	-3.18334	0.00145587	0.0131803	ssa04	65918311	65927604	LOC106603773	leucine-rich repeat-containing protein 32-like%2C transcript variant X6
172	gene10328:106603773	237.827	-0.348781	0.109565	-3.18334	0.00145587	0.0131803	ssa04	65918538	65927604	LOC106603773	leucine-rich repeat-containing protein 32-like%2C transcript variant X4
173	gene10328:106603773	237.827	-0.348781	0.109565	-3.18334	0.00145587	0.0131803	ssa04	65918538	65927604	LOC106603773	leucine-rich repeat-containing protein 32-like%2C transcript variant X2
174	gene10328:106603773	237.827	-0.348781	0.109565	-3.18334	0.00145587	0.0131803	ssa04	65918538	65927604	LOC106603773	leucine-rich repeat-containing protein 32-like%2C transcript variant X1
175	gene10328:106603773	237.827	-0.348781	0.109565	-3.18334	0.00145587	0.0131803	ssa04	65917676	65927604	LOC106603773	leucine-rich repeat-containing protein 32-like%2C transcript variant X3
176	gene10330:106603770	854.094	-0.403813	0.0739277	-5.46227	4.70086e-08	6.41177e-06	ssa04	65982647	65994899	nhlrc3	NHL repeat containing 3
177	gene10355:106603806	741.287	-0.535361	0.149137	-3.58972	0.000331031	0.00463255	ssa04	67944910	67947990	LOC106603806	CREB/ATF bZIP transcription factor-like
178	gene10368:106603818	2437.38	-0.365585	0.0885317	-4.12943	3.6367e-05	0.000972477	ssa04	68631639	68648048	LOC106603818	trans-Golgi network integral membrane protein 1-like
179	gene10384:100196889	450.385	-0.257156	0.0806802	-3.18735	0.00143582	0.0130439	ssa04	69818529	69856992	pdli4	PDZ and LIM domain protein 4
180	gene10386:106603838	252.891	-0.396737	0.11158	-3.55563	0.000377074	0.00507442	ssa04	69905063	69937521	LOC106603838	prolyl 4-hydroxylase subunit alpha-2-like%2C transcript variant X1
181	gene10386:106603838	252.891	-0.396737	0.11158	-3.55563	0.000377074	0.00507442	ssa04	69897772	69937521	LOC106603838	prolyl 4-hydroxylase subunit alpha-2-like%2C transcript variant X2
182	gene10387:106603839	28.3329	0.766946	0.254535	3.01312	0.00258574	0.0196847	ssa04	69946204	69987996	LOC106603839	janus kinase and microtubule-interacting protein 2-like%2C transcript variant X5
183	gene10387:106603839	28.3329	0.766946	0.254535	3.01312	0.00258574	0.0196847	ssa04	69946203	69988881	LOC106603839	janus kinase and microtubule-interacting protein 2-like%2C transcript variant X3
184	gene10387:106603839	28.3329	0.766946	0.254535	3.01312	0.00258574	0.0196847	ssa04	69946204	69987996	LOC106603839	janus kinase and microtubule-interacting protein 2-like%2C transcript variant X4
185	gene10387:106603839	28.3329	0.766946	0.254535	3.01312	0.00258574	0.0196847	ssa04	69946204	69988880	LOC106603839	janus kinase and microtubule-interacting protein 2-like%2C transcript variant X2
186	gene10387:106603839	28.3329	0.766946	0.254535	3.01312	0.00258574	0.0196847	ssa04	69946204	69988879	LOC106603839	janus kinase and microtubule-interacting protein 2-like%2C transcript variant X1
187	gene10393:106603845	798.263	-0.29474	0.100067	-2.94543	0.00322509	0.0229466	ssa04	70213709	70273812	LOC106603845	SH3 and PX domain-containing protein 2B-like%2C transcript variant X2
188	gene10393:106603845	798.263	-0.29474	0.100067	-2.94543	0.00322509	0.0229466	ssa04	70213709	70273812	LOC106603845	SH3 and PX domain-containing protein 2B-like%2C transcript variant X3
189	gene10393:106603845	798.263	-0.29474	0.100067	-2.94543	0.00322509	0.0229466	ssa04	70213709	70273812	LOC106603845	SH3 and PX domain-containing protein 2B-like%2C transcript variant X1
190	gene104:100196112	189.986	-0.509834	0.15245	-3.34428	0.000824966	0.00887601	ssa01	4470451	4472637	cdkn3	cyclin-dependent kinase inhibitor 3%2C transcript variant X1
191	gene104:100196112	189.986	-0.509834	0.15245	-3.34428	0.000824966	0.00887601	ssa01	4470478	4472682	cdkn3	cyclin-dependent kinase inhibitor 3
192	gene104:100196112	189.986	-0.509834	0.15245	-3.34428	0.000824966	0.00887601	ssa01	4471006	4472637	cdkn3	cyclin-dependent kinase inhibitor 3%2C transcript variant X2
193	gene1040:106604487	172.078	0.395428	0.118247	3.34408	0.000825566	0.0088776	ssa01	48321504	48353733	LOC106604487	protein FAM83H-like%2C transcript variant X2
194	gene1040:106604487	172.078	0.395428	0.118247	3.34408	0.000825566	0.0088776	ssa01	48321503	48353689	LOC106604487	protein FAM83H-like%2C transcript variant X3
195	gene1040:106604487	172.078	0.395428	0.118247	3.34408	0.000825566	0.0088776	ssa01	48321504	48353689	LOC106604487	protein FAM83H-like%2C transcript variant X1
196	gene10408:106603858	145.583	-0.62461	0.161039	-3.87864	0.000105043	0.00206109	ssa04	71630006	71634386	LOC106603858	putative fibroblast growth factor 1
197	gene10414:106603861	4.52119	1.57117	0.394253	3.98518	6.74295e-05	0.0014987	ssa04	72172771	72261178	LOC106603861	BTB/POZ domain-containing protein KCTD16-like
198	gene10424:106603870	712.529	-0.31682	0.103517	-3.06056	0.00220924	0.0176892	ssa04	72880572	72915342	LOC106603870	cytoplasmic polyadenylation element-binding protein 4-like%2C transcript variant X1
199	gene10424:106603870	712.529	-0.31682	0.103517	-3.06056	0.00220924	0.0176892	ssa04	72880572	72915340	LOC106603870	cytoplasmic polyadenylation element-binding protein 4-like%2C transcript variant X2
200	gene10425:106603873	407.163	-0.251045	0.0939395	-2.67241	0.00753086	0.0414672	ssa04	72970455	72972216	LOC106603873	biorientation of chromosomes in cell division protein 1-like
201	gene10427:106603874	383.594	-0.513283	0.140968	-3.64114	0.000271431	0.00405412	ssa04	73013547	73016376	LOC106603874	vesicle transport protein SEC20-like
202	gene10432:106603877	324.177	0.2388	0.0650786	3.6694	0.000243119	0.00374811	ssa04	73256677	73271049	LOC106603877	transcription elongation regulator 1-like
203	gene10441:106603884	43.7438	0.665332	0.184774	3.60079	0.000317251	0.00450063	ssa04	73883875	73886251	LOC106603884	octapeptide-repeat protein T2-like
204	gene10457:106603906	310.041	0.323469	0.121813	2.65545	0.00792026	0.0429224	ssa04	74251992	74255377	LOC106603906	early growth response protein 1-like
205	gene10463:106603911	150.289	0.237867	0.0836334	2.84416	0.00445288	0.0287836	ssa04	74454576	74473773	LOC106603911	PWWP domain-containing protein 2A-like%2C transcript variant X3
206	gene10463:106603911	150.289	0.237867	0.0836334	2.84416	0.00445288	0.0287836	ssa04	74457965	74473772	LOC106603911	PWWP domain-containing protein 2A-like%2C transcript variant X1
207	gene10468:106603916	99.8529	-0.673945	0.130379	-5.16914	2.35176e-07	2.09959e-05	ssa04	74565287	74567962	LOC106603916	proheparin-binding EGF-like growth factor
208	gene10469:106603917	318.027	0.240231	0.0803789	2.98873	0.00280139	0.0207667	ssa04	74569120	74576039	LOC106603917	heterogeneous nuclear ribonucleoprotein H-like%2C transcript variant X2
209	gene10469:106603917	318.027	0.240231	0.0803789	2.98873	0.00280139	0.0207667	ssa04	74569120	74576039	LOC106603917	heterogeneous nuclear ribonucleoprotein H-like%2C transcript variant X1
210	gene10469:106603917	318.027	0.240231	0.0803789	2.98873	0.00280139	0.0207667	ssa04	74569120	74576005	LOC106603917	heterogeneous nuclear ribonucleoprotein H-like%2C transcript variant X4
211	gene10469:106603917	318.027	0.240231	0.0803789	2.98873	0.00280139	0.0207667	ssa04	74569120	74575994	LOC106603917	heterogeneous nuclear ribonucleoprotein H-like%2C transcript variant X5
212	gene10469:106603917	318.027	0.240231	0.0803789	2.98873	0.00280139	0.0207667	ssa04	74569120	74576039	LOC106603917	heterogeneous nuclear ribonucleoprotein H-like%2C transcript variant X3
213	gene10474:106603921	544.596	-0.197911	0.0711046	-2.78338	0.00537957	0.0328341	ssa04	74645982	74650724	mat2b	methionine adenosyltransferase II%2C beta%2C transcript variant X2
214	gene10474:106603921	544.596	-0.197911	0.0711046	-2.78338	0.00537957	0.0328341	ssa04	74646691	74650991	mat2b	methionine adenosyltransferase II%2C beta%2C transcript variant X1
215	gene10475:106603922	139.949	-0.44505	0.126661	-3.51372	0.000441885	0.00568205	ssa04	74658575	75017771	tenm2	teneurin transmembrane protein 2%2C transcript variant X3
216	gene10475:106603922	139.949	-0.44505	0.126661	-3.51372	0.000441885	0.00568205	ssa04	74658575	75017771	tenm2	teneurin transmembrane protein 2%2C transcript variant X4
217	gene10475:106603922	139.949	-0.44505	0.126661	-3.51372	0.000441885	0.00568205	ssa04	74658575	75017771	tenm2	teneurin transmembrane protein 2%2C transcript variant X1
218	gene10475:106603922	139.949	-0.44505	0.126661	-3.51372	0.000441885	0.00568205	ssa04	74658575	74777998	tenm2	teneurin transmembrane protein 2%2C transcript variant X5
219	gene10475:106603922	139.949	-0.44505	0.126661	-3.51372	0.000441885	0.00568205	ssa04	74658575	75017771	tenm2	teneurin transmembrane protein 2%2C transcript variant X2
220	gene10475:106603922	139.949	-0.44505	0.126661	-3.51372	0.000441885	0.00568205	ssa04	74658575	74777998	tenm2	teneurin transmembrane protein 2%2C transcript variant X7
221	gene10475:106603922	139.949	-0.44505	0.126661	-3.51372	0.000441885	0.00568205	ssa04	74658575	74777998	tenm2	teneurin transmembrane protein 2%2C transcript variant X6
222	gene10476:106603941	355.779	-1.31931	0.303755	-4.34335	1.40327e-05	0.000476432	ssa04	75136892	75138176	LOC106603941	insulin-like
223	gene10484:106603930	399.526	-0.184522	0.0678652	-2.71895	0.00654895	0.0377097	ssa04	75493893	75532891	LOC106603930	rabankyrin-5-like%2C transcript variant X2
224	gene10484:106603930	399.526	-0.184522	0.0678652	-2.71895	0.00654895	0.0377097	ssa04	75494008	75532891	LOC106603930	rabankyrin-5-like%2C transcript variant X1
225	gene10488:106603934	31.7754	0.49662	0.183391	2.70798	0.00676942	0.0385889	ssa04	75747060	75887709	LOC106603934	calcium/calmodulin-dependent protein kinase kinase 1-like%2C transcript variant X1
226	gene10488:106603934	31.7754	0.49662	0.183391	2.70798	0.00676942	0.0385889	ssa04	75747060	75887709	LOC106603934	calcium/calmodulin-dependent protein kinase kinase 1-like%2C transcript variant X2
227	gene10495:106603942	167.643	0.353951	0.0798622	4.43202	9.33543e-06	0.000353622	ssa04	76180355	76198100	dhx33	DEAH (Asp-Glu-Ala-His) box polypeptide 33
228	gene10496:106603944	871.969	-0.394171	0.122126	-3.22756	0.00124849	0.0118376	ssa04	76198396	76205386	LOC106603944	complement component 1 Q subcomponent-binding protein%2C mitochondrial-like
229	gene10497:100195600	675.889	-0.346908	0.117234	-2.9591	0.00308536	0.0222462	ssa04	76205575	76207989	rpain	RPA interacting protein
230	gene105:100286498	1013.75	-0.172498	0.0595264	-2.89783	0.0037575	0.025602	ssa01	4473244	4489316	cnih1	cornichon family AMPA receptor auxiliary protein 1
231	gene105:100286498	1013.75	-0.172498	0.0595264	-2.89783	0.0037575	0.025602	ssa01	4473242	4489437	cnih1	cornichon family AMPA receptor auxiliary protein 1%2C transcript variant X1
232	gene10511:100196849	843.184	-0.29364	0.0821088	-3.57623	0.000348587	0.0048062	ssa04	77101386	77103221	supt4h1	suppressor of Ty 4 homolog 1 (S. cerevisiae)
233	gene10518:100195592	642.26	-0.359021	0.0697973	-5.14376	2.69287e-07	2.33704e-05	ssa04	77269962	77271802	znhit3	zinc finger%2C HIT-type containing 3
234	gene10519:106603971	192.469	0.21334	0.0788947	2.7041	0.0068489	0.038884	ssa04	77271799	77293000	myo19	myosin XIX%2C transcript variant X1
235	gene10519:106603971	192.469	0.21334	0.0788947	2.7041	0.0068489	0.038884	ssa04	77279927	77293001	myo19	myosin XIX%2C transcript variant X2
236	gene1052:106604566	200.195	-0.426072	0.140636	-3.0296	0.00244878	0.018973	ssa01	48647172	48675410	LOC106604566	proto-oncogene tyrosine-protein kinase receptor Ret-like%2C transcript variant X2
237	gene1052:106604566	200.195	-0.426072	0.140636	-3.0296	0.00244878	0.018973	ssa01	48647172	48675003	LOC106604566	proto-oncogene tyrosine-protein kinase receptor Ret-like%2C transcript variant X1
238	gene10522:106603970	1141.82	-0.349739	0.0747842	-4.67664	2.91611e-06	0.000149155	ssa04	77319021	77327371	LOC106603970	histone deacetylase complex subunit SAP30L
239	gene10530:100196830	681.591	-0.883239	0.149547	-5.90608	3.50343e-09	8.19176e-07	ssa04	77724489	77739228	pcbd2	pterin-4 alpha-carbinolamine dehydratase/dimerization cofactor of hepatocyte nuclear factor 1 alpha (TCF1) 2
240	gene10530:100196830	681.591	-0.883239	0.149547	-5.90608	3.50343e-09	8.19176e-07	ssa04	77724487	77739316	pcbd2	pterin-4 alpha-carbinolamine dehydratase/dimerization cofactor of hepatocyte nuclear factor 1 alpha (TCF1) 2%2C transcript variant X1
241	gene10549:106603990	57.5171	0.593099	0.16527	3.58865	0.000332389	0.00464498	ssa04	78234975	78267326	LOC106603990	serine/threonine-protein kinase TAO1-like
242	gene10552:106603992	35.4588	0.596716	0.185548	3.21596	0.00130008	0.0121719	ssa04	78383439	78408401	smg6	SMG6 nonsense mediated mRNA decay factor
243	gene10556:106603996	46.2939	0.434684	0.150727	2.88391	0.00392767	0.0264009	ssa04	78667077	78681819	smyd4	SET and MYND domain containing 4%2C transcript variant X1
244	gene10556:106603996	46.2939	0.434684	0.150727	2.88391	0.00392767	0.0264009	ssa04	78667077	78681819	smyd4	SET and MYND domain containing 4%2C transcript variant X2
245	gene10577:106604011	83.0937	0.669358	0.179356	3.732	0.000189967	0.00313805	ssa04	79524484	79547563	LOC106604011	SUMO-specific isopeptidase USPL1-like
246	gene10581:106604018	114.479	0.347826	0.124655	2.79032	0.00526565	0.0323196	ssa04	79732732	79734990	rfc3	replication factor C (activator 1) 3%2C 38kDa%2C transcript variant X2
247	gene10581:106604018	114.479	0.347826	0.124655	2.79032	0.00526565	0.0323196	ssa04	79732527	79734990	rfc3	replication factor C (activator 1) 3%2C 38kDa%2C transcript variant X1
248	gene1059:106604619	36.2178	0.489305	0.168326	2.90688	0.00365048	0.0250966	ssa01	48925722	48956074	LOC106604619	phosphoinositide 3-kinase adapter protein 1-like%2C transcript variant X2
249	gene1059:106604619	36.2178	0.489305	0.168326	2.90688	0.00365048	0.0250966	ssa01	48925722	48956074	LOC106604619	phosphoinositide 3-kinase adapter protein 1-like%2C transcript variant X1
250	gene10592:106604029	606.352	0.423765	0.151892	2.78992	0.00527213	0.0323391	ssa04	80179928	80215738	LOC106604029	integrin beta-like protein A%2C transcript variant X1
251	gene10599:106604036	160.32	0.517722	0.183568	2.82033	0.00479743	0.0303483	ssa04	80504350	80523318	LOC106604036	B-cell receptor CD22-like%2C transcript variant X6
252	gene10599:106604036	160.32	0.517722	0.183568	2.82033	0.00479743	0.0303483	ssa04	80504037	80523320	LOC106604036	B-cell receptor CD22-like%2C transcript variant X4
253	gene10599:106604036	160.32	0.517722	0.183568	2.82033	0.00479743	0.0303483	ssa04	80504351	80523318	LOC106604036	B-cell receptor CD22-like%2C transcript variant X5
254	gene10599:106604036	160.32	0.517722	0.183568	2.82033	0.00479743	0.0303483	ssa04	80504037	80524462	LOC106604036	B-cell receptor CD22-like%2C transcript variant X3
255	gene10599:106604036	160.32	0.517722	0.183568	2.82033	0.00479743	0.0303483	ssa04	80504037	80524461	LOC106604036	B-cell receptor CD22-like%2C transcript variant X2
256	gene10599:106604036	160.32	0.517722	0.183568	2.82033	0.00479743	0.0303483	ssa04	80504037	80523320	LOC106604036	B-cell receptor CD22-like%2C transcript variant X1
257	gene1060:106604631	124.582	-0.452359	0.168201	-2.6894	0.00715804	0.0400545	ssa01	48994719	49011491	fam204a	family with sequence similarity 204%2C member A%2C transcript variant X5
258	gene1060:106604631	124.582	-0.452359	0.168201	-2.6894	0.00715804	0.0400545	ssa01	48994719	49011493	fam204a	family with sequence similarity 204%2C member A%2C transcript variant X7
259	gene1060:106604631	124.582	-0.452359	0.168201	-2.6894	0.00715804	0.0400545	ssa01	48994719	49011492	fam204a	family with sequence similarity 204%2C member A%2C transcript variant X4
260	gene1060:106604631	124.582	-0.452359	0.168201	-2.6894	0.00715804	0.0400545	ssa01	48994719	49011905	fam204a	family with sequence similarity 204%2C member A%2C transcript variant X9
261	gene1060:106604631	124.582	-0.452359	0.168201	-2.6894	0.00715804	0.0400545	ssa01	48994719	49011493	fam204a	family with sequence similarity 204%2C member A%2C transcript variant X1
262	gene1060:106604631	124.582	-0.452359	0.168201	-2.6894	0.00715804	0.0400545	ssa01	48994719	49008507	fam204a	family with sequence similarity 204%2C member A%2C transcript variant X12
263	gene1060:106604631	124.582	-0.452359	0.168201	-2.6894	0.00715804	0.0400545	ssa01	48994719	49011495	fam204a	family with sequence similarity 204%2C member A%2C transcript variant X10
264	gene1060:106604631	124.582	-0.452359	0.168201	-2.6894	0.00715804	0.0400545	ssa01	48994719	49011494	fam204a	family with sequence similarity 204%2C member A%2C transcript variant X3
265	gene1060:106604631	124.582	-0.452359	0.168201	-2.6894	0.00715804	0.0400545	ssa01	48994719	49003832	fam204a	family with sequence similarity 204%2C member A%2C transcript variant X11
266	gene1060:106604631	124.582	-0.452359	0.168201	-2.6894	0.00715804	0.0400545	ssa01	48994719	49011492	fam204a	family with sequence similarity 204%2C member A%2C transcript variant X2
267	gene1060:106604631	124.582	-0.452359	0.168201	-2.6894	0.00715804	0.0400545	ssa01	48994719	49011905	fam204a	family with sequence similarity 204%2C member A%2C transcript variant X8
268	gene1060:106604631	124.582	-0.452359	0.168201	-2.6894	0.00715804	0.0400545	ssa01	48994719	49011905	fam204a	family with sequence similarity 204%2C member A%2C transcript variant X6
269	gene10610:106604044	51.1516	-0.745637	0.187071	-3.98586	6.72372e-05	0.00149729	ssa04	80919681	80932490	LOC106604044	protein Mis18-alpha-like
270	gene1062:100196704	77.0753	-0.561918	0.122579	-4.58413	4.55889e-06	0.000209944	ssa01	49323745	49328924	emx2	empty spiracles homeobox 2%2C transcript variant X1
271	gene1062:100196704	77.0753	-0.561918	0.122579	-4.58413	4.55889e-06	0.000209944	ssa01	49323745	49328759	emx2	empty spiracles homeobox 2
272	gene10630:106604062	1349.35	0.332871	0.0810526	4.10685	4.01094e-05	0.00103757	ssa04	82109193	82145221	LOC106604062	inhibitor of apoptosis protein-like%2C transcript variant X7
273	gene10630:106604062	1349.35	0.332871	0.0810526	4.10685	4.01094e-05	0.00103757	ssa04	82109169	82145221	LOC106604062	inhibitor of apoptosis protein-like%2C transcript variant X6
274	gene10630:106604062	1349.35	0.332871	0.0810526	4.10685	4.01094e-05	0.00103757	ssa04	82104846	82139870	LOC106604062	inhibitor of apoptosis protein-like%2C transcript variant X5
275	gene10630:106604062	1349.35	0.332871	0.0810526	4.10685	4.01094e-05	0.00103757	ssa04	82104846	82145220	LOC106604062	inhibitor of apoptosis protein-like%2C transcript variant X1
276	gene10631:106604063	39.2352	0.555853	0.143071	3.88516	0.000102264	0.00201764	ssa04	82167352	82175304	LOC106604063	transcriptional coactivator YAP1-like
277	gene10632:100286716	221.541	-0.754618	0.152453	-4.94984	7.42754e-07	5.1732e-05	ssa04	82212543	82212713	mia	melanoma inhibitory activity
278	gene10635:106604067	124.292	0.52749	0.126057	4.18454	2.85741e-05	0.000808681	ssa04	82301906	82320259	dlat	dihydrolipoamide S-acetyltransferase
279	gene10641:106604072	27.0848	0.527372	0.203154	2.59592	0.00943384	0.0484989	ssa05	81603	109387	LOC106604072	probable G-protein coupled receptor 174
280	gene10642:106604073	16.9737	0.680281	0.261314	2.60331	0.00923296	0.0478355	ssa05	147247	176008	LOC106604073	putative P2Y purinoceptor 10%2C transcript variant X5
281	gene10642:106604073	16.9737	0.680281	0.261314	2.60331	0.00923296	0.0478355	ssa05	147247	176008	LOC106604073	putative P2Y purinoceptor 10%2C transcript variant X2
282	gene10642:106604073	16.9737	0.680281	0.261314	2.60331	0.00923296	0.0478355	ssa05	147247	176008	LOC106604073	putative P2Y purinoceptor 10%2C transcript variant X4
283	gene10642:106604073	16.9737	0.680281	0.261314	2.60331	0.00923296	0.0478355	ssa05	147247	176008	LOC106604073	putative P2Y purinoceptor 10%2C transcript variant X1
284	gene10642:106604073	16.9737	0.680281	0.261314	2.60331	0.00923296	0.0478355	ssa05	147247	176008	LOC106604073	putative P2Y purinoceptor 10%2C transcript variant X3
285	gene10643:106604074	265.283	0.371502	0.102454	3.62605	0.000287792	0.00422973	ssa05	162100	171513	LOC106604074	E3 ubiquitin-protein ligase RING2-like%2C transcript variant X4
286	gene10643:106604074	265.283	0.371502	0.102454	3.62605	0.000287792	0.00422973	ssa05	162100	171512	LOC106604074	E3 ubiquitin-protein ligase RING2-like%2C transcript variant X2
287	gene10643:106604074	265.283	0.371502	0.102454	3.62605	0.000287792	0.00422973	ssa05	162100	171511	LOC106604074	E3 ubiquitin-protein ligase RING2-like%2C transcript variant X1
288	gene10643:106604074	265.283	0.371502	0.102454	3.62605	0.000287792	0.00422973	ssa05	162100	171512	LOC106604074	E3 ubiquitin-protein ligase RING2-like%2C transcript variant X3
289	gene10645:106604075	17.2803	0.723029	0.18547	3.89836	9.68474e-05	0.00194199	ssa05	220862	224215	LOC106604075	lysophosphatidic acid receptor 4-like
[truncated: 16,534 more rows]

## Sheet: 30v60
	gene_ID	baseMean	log2FoldChange	lfcSE	stat	pvalue	padj	contig_ID	start	end	gene_name	product
[truncated: 282 more rows]
